# Supplementary material for: A rapid systematic review and evidence synthesis of effective coverage measures and cascades for childbirth, newborn and child health in low- and middle-income countries
Source: PubMed Central journal article supplement (PMC8801924; doi:10.7189/jogh.12.04001), 2022-01-15
Supplement: jogh-12-04001-s001.pdf [file jogh-12-04001-s001.pdf]

## APPENDIX S1 – SEARCH TERMS

Table S1 Summary of search terms

| Term     | Concept                   | Search terms                                                                                                                                                                                                                                                                                                                                                                                                                                                                                                                                                                                                                                                                                                                                                                                                                                                                                                                                                                   |
|----------|---------------------------|--------------------------------------------------------------------------------------------------------------------------------------------------------------------------------------------------------------------------------------------------------------------------------------------------------------------------------------------------------------------------------------------------------------------------------------------------------------------------------------------------------------------------------------------------------------------------------------------------------------------------------------------------------------------------------------------------------------------------------------------------------------------------------------------------------------------------------------------------------------------------------------------------------------------------------------------------------------------------------|
| 1        | Coverage                  | Clinical competence.mp.; OR Contact.mp.; Content coverage.mp.; OR Coverage.mp.; effective coverage.mp.; OR Health Facilities.mp.; OR Health Services Accessibility.mp.; OR Health Services Needs and Demand.mp.; OR high quality contact.mp.; OR input adjusted coverage.mp.; OR intervention coverage.mp.; OR Medical Audit.mp.; OR outcome adjusted coverage.mp.; OR Patient Acceptance of Health Care.mp.; OR Population level coverage.mp.; quality adjusted contact.mp.; OR quality adjusted coverage.mp.; OR quality adjusted measurement.mp.; OR quality along the continuum.mp.; OR Quality Assurance.mp.; OR quality cascade.mp.; OR quality contact.mp.; OR Quality improvement.mp.; OR Quality indicators.mp.; OR OR Quality of care.mp.; OR Quality of Health Care.mp.;                                                                                                                                                                                            |
| 2        | Bottleneck                | adequate care.mp.; OR bottleneck.mp.; OR bottleneck analysis.mp.; OR bottleneck of implementation.mp.; OR gaps in coverage.mp.; OR implementation bottleneck.mp.; OR Tanahashi.mp.                                                                                                                                                                                                                                                                                                                                                                                                                                                                                                                                                                                                                                                                                                                                                                                             |
| 3        | Linking                   | linking household.mp.; OR linking household. OR linking household survey and health facility.mp.; OR linking service.mp.                                                                                                                                                                                                                                                                                                                                                                                                                                                                                                                                                                                                                                                                                                                                                                                                                                                       |
| <b>4</b> | <b>Effective coverage</b> | <b>Term 1 OR Term 2 OR Term 3</b>                                                                                                                                                                                                                                                                                                                                                                                                                                                                                                                                                                                                                                                                                                                                                                                                                                                                                                                                              |
| 5        | Child health intervention | care seeking.mp. ; OR childhood illness.mp. ; OR pneumonia.mp. ; OR diarrh*.mp. ; OR newborn illness.mp. ; OR health worker.mp. ; OR facility readiness.mp. ; OR intervention.mp. ; OR utilization.mp. ; OR access to care.mp. ; OR availability coverage.mp. ; OR health facilities.mp. ; OR accessibility coverage.mp. ; OR health facility.mp. ; OR HIV.mp. ; OR perinatal care.mp. ; OR postnatal care.mp. ; OR immunization.mp. ; OR immunisation.mp. ; OR treatment of sick children.mp. ; OR nutrition coverage.mp. ; OR newborn care.mp. ; OR breastfeeding.mp. ; OR infant feeding.mp. ; OR (maternal and child health intervention).mp. ; OR MCH intervention.mp. ; OR content intervention.mp. ; OR childhood immunization.mp. ; OR childhood vaccination.mp. ; OR missed opportunities.mp. ; OR malaria prevention.mp. ; OR malaria treatment.mp. ; OR health service delivery.mp. ; OR health service provision.mp. ; OR community health worker.mp. ; OR CHW.mp. |
| 6        | Newborn/child             | Adolescent.mp.; OR baby.mp.; OR boy.mp.; OR child mortality.mp.; OR child*.mp.; OR child, preschool.mp.; OR exp adolescent/ or exp child/ or exp infant/; OR girl.mp.; OR infant.mp.; OR infant.mp., low birth weight.mp.; OR infant, newborn.mp.; OR infant, small for gestational age.mp.; OR neonatal.mp.; OR neonate.mp.; OR newborn.mp.; OR young infant.mp.                                                                                                                                                                                                                                                                                                                                                                                                                                                                                                                                                                                                              |
| 7        | Childbirth                | obstetric care.mp. ; OR obstetric services.mp. ; OR (maternal and newborn).mp.; OR (maternal and child).mp. ; OR RMNCH.mp. ; OR mnch.mp. ; OR mnh.mp. ; OR intrapartum.mp. ; OR peripartum.mp. ; OR labour.mp. ; OR labor.mp. ; OR facility delivery.mp. ; OR facility birth.mp. ; OR facility based birth.mp. ; OR institutional birth.mp. ; OR childbirth.mp. ; OR birth.mp. ; OR immediate newborn.mp.                                                                                                                                                                                                                                                                                                                                                                                                                                                                                                                                                                      |
| 8        | Postnatal care            | postpartum care.mp. ; OR Postpartum Period/; OR PPC.mp.                                                                                                                                                                                                                                                                                                                                                                                                                                                                                                                                                                                                                                                                                                                                                                                                                                                                                                                        |
| 9        | Child health              | Breastfeeding.mp.; OR childhood illness.mp.; OR childhood immunizations.mp.; OR childhood vaccinations.mp.; OR diarrhea.mp.; OR HIV.mp.; OR Immunization/ immunisation.mp.; OR infant feeding.mp.; OR malaria prevention.mp.; OR malaria treatment.mp.; OR maternal and child health interventions.mp.; OR MCH Interventions.mp.; OR newborn                                                                                                                                                                                                                                                                                                                                                                                                                                                                                                                                                                                                                                   |

|    |                                    |                                                                                                                                                                                                                                                                                                                                                                                                                                                                                                                                                                                                                                                                                                                                                                                                                                                                                                                                                                                                                                                                                                                                                                                                                                                                                                                                                                                                                                                                                                                                                                                                                                                                                                                                                                                                                                                                                                                                                                                                                                                                                                                                                                                                                                                                                                                                                                                                                                                                                                                                                                                                                                                                                                                                                                                                                                                                                                                                                                                                                                                                                                                                                                                                                                                                                                                                                                                                                                                                                                                                                                                                                                                                                                                                                                                                                                           |
|----|------------------------------------|-------------------------------------------------------------------------------------------------------------------------------------------------------------------------------------------------------------------------------------------------------------------------------------------------------------------------------------------------------------------------------------------------------------------------------------------------------------------------------------------------------------------------------------------------------------------------------------------------------------------------------------------------------------------------------------------------------------------------------------------------------------------------------------------------------------------------------------------------------------------------------------------------------------------------------------------------------------------------------------------------------------------------------------------------------------------------------------------------------------------------------------------------------------------------------------------------------------------------------------------------------------------------------------------------------------------------------------------------------------------------------------------------------------------------------------------------------------------------------------------------------------------------------------------------------------------------------------------------------------------------------------------------------------------------------------------------------------------------------------------------------------------------------------------------------------------------------------------------------------------------------------------------------------------------------------------------------------------------------------------------------------------------------------------------------------------------------------------------------------------------------------------------------------------------------------------------------------------------------------------------------------------------------------------------------------------------------------------------------------------------------------------------------------------------------------------------------------------------------------------------------------------------------------------------------------------------------------------------------------------------------------------------------------------------------------------------------------------------------------------------------------------------------------------------------------------------------------------------------------------------------------------------------------------------------------------------------------------------------------------------------------------------------------------------------------------------------------------------------------------------------------------------------------------------------------------------------------------------------------------------------------------------------------------------------------------------------------------------------------------------------------------------------------------------------------------------------------------------------------------------------------------------------------------------------------------------------------------------------------------------------------------------------------------------------------------------------------------------------------------------------------------------------------------------------------------------------------------|
|    |                                    | care.mp.; OR newborn illness.mp.; OR nutrition.mp.; OR pneumonia.mp.; OR treatment of sick children.mp.;                                                                                                                                                                                                                                                                                                                                                                                                                                                                                                                                                                                                                                                                                                                                                                                                                                                                                                                                                                                                                                                                                                                                                                                                                                                                                                                                                                                                                                                                                                                                                                                                                                                                                                                                                                                                                                                                                                                                                                                                                                                                                                                                                                                                                                                                                                                                                                                                                                                                                                                                                                                                                                                                                                                                                                                                                                                                                                                                                                                                                                                                                                                                                                                                                                                                                                                                                                                                                                                                                                                                                                                                                                                                                                                                  |
| 10 | Target population/<br>intervention | Term 5 OR Term 6 OR Term 7 OR Term 8 OR Term 9                                                                                                                                                                                                                                                                                                                                                                                                                                                                                                                                                                                                                                                                                                                                                                                                                                                                                                                                                                                                                                                                                                                                                                                                                                                                                                                                                                                                                                                                                                                                                                                                                                                                                                                                                                                                                                                                                                                                                                                                                                                                                                                                                                                                                                                                                                                                                                                                                                                                                                                                                                                                                                                                                                                                                                                                                                                                                                                                                                                                                                                                                                                                                                                                                                                                                                                                                                                                                                                                                                                                                                                                                                                                                                                                                                                            |
| 11 | Setting; LMIC                      | Developing Countries/; OR ((developing or less* developed or under developed or underdeveloped or middle income or low* income) adj (economy or economies)) .ti,ab. ; OR ((developing or less* developed or under developed or underdeveloped or middle income or low* income or underserved or under served or deprived or poor*) adj (countr* or nation? or population? or world.ti,ab.; OR (low* adj (gdp or gnp or gross domestic or gross national)) .ti,ab. ; OR (low adj3 middle adj3 countr*).ti,ab.; OR (lmic or lmic3 or third world or lami countr.ti,ab.; OR transitional countr.ti,ab.; OR global south.ti,ab.; OR Democratic People's Republic of Korea/; OR (North Korea or (Democratic People* Republic adj2 Korea)) .ti,ab.; OR Cambodia/; OR Cambodia.ti,ab. ; OR Indonesia/; OR (Indonesia or Dutch East Indies) .ti,ab. ; OR (Kiribati or Gilbert Islands or Phoenix Islands or Line Islands) .ti,ab.; OR Laos/; OR (Laos or (Lao adj1 Democratic Republic)) .ti,ab. ; OR Micronesia/; OR Micronesia.ti,ab.; OR Mongolia/; OR Mongolia.ti,ab. ; OR Myanmar/; OR (Myanmar or Burma).ti,ab.; OR Papua New Guinea/; OR (Papua New Guinea or German New Guinea or British New Guinea or Territory of Papua) .ti,ab. ; OR Philippines/; OR (Philippines or Philippine Islands) .ti,ab. ; OR Solomon Islands.ti,ab.; OR Timor-Leste/; OR (Timor-Leste or East Timor or Portuguese Timor) .ti,ab. ; OR Vanuatu/; OR (Vanuatu or New Hebrides) .ti,ab. ; OR Vietnam/; OR (Viet Nam or Vietnam or French Indochina) .ti,ab.; OR American Samoa/; OR American Samoa.ti,ab.; OR exp China/; OR China.ti,ab.; OR Fiji/; OR Fiji.ti,ab. ; OR Malaysia/; OR (Malaysia or Malayan Union or Malaya) .ti,ab. ; OR Marshall Islands.ti,ab.; OR Nauru.ti,ab.; OR Independent State of Samoa"/; OR ((Samoa not American Samoa) or Western Samoa or Navigator Islands or Samoan Islands) .ti,ab. ; OR Thailand/; OR (Thailand or Siam) .ti,ab. ; OR Tonga/; OR Tonga.ti,ab.; OR (Tuvalu or Ellice Islands) .ti,ab. ; OR Melanesia/; OR Melanesia.ti,ab.; OR Polynesia/; OR Polynesia.ti,ab.; OR Kyrgyzstan/; OR (Kyrgyzstan or Kyrgyz Republic or Kirghizia or Kirghiz) .ti,ab. ; OR Moldova/; OR Moldova.ti,ab.; OR Ukraine/; OR Ukraine.ti,ab; OR Uzbekistan/; OR Uzbekistan.ti,ab.; OR Albania/; OR Albania.ti,ab.; OR Armenia/ ; OR Armenia.ti,ab.; OR Azerbaijan/; OR Azerbaijan.ti,ab.; OR "Republic of Belarus"/; OR (Belarus or Byelarus or Byelorussia or Belorussia) .ti,ab.; OR Bosnia-Herzegovina/; OR (Bosnia or Herzegovina) .ti,ab. ; OR Bulgaria/ ; OR Bulgaria.ti,ab.; OR Georgia (Republic)" .ti,ab. ; OR Georgia.ti,ab. not Georgia/ ; OR Kazakhstan/; OR (Kazakhstan or Kazakh) .ti,ab. ; OR Kosovo/; OR Kosovo.ti,ab.; OR Montenegro/; OR Montenegro.ti,ab.; OR Republic of North Macedonia"/; OR North Macedonia.ti,ab.; OR Romania/; OR Romania.ti,ab.; OR exp Russia/; OR Russia (Pre-1917)"/ ; OR USSR/; OR (Russia or Russian Federation or USSR or Union of Soviet Socialist Republics or Soviet Union) .ti,ab. ; OR Serbia/; OR Serbia/; OR Turkey/; OR (Turkey.ti,ab. not animal/) or (Anatolia or Asia Minor) .ti,ab. ; OR Turkmenistan/; OR Turkmenistan.ti,ab.; OR Tajikistan/; OR Tajikistan.ti,ab.; OR Asia, Central/; OR Asia, Northern/; OR Central Asia.ti,ab.; OR Haiti/; OR (Haiti or Hayti) .ti,ab. ; OR Bolivia/; OR Bolivia.ti,ab.; OR El Salvador/; OR El Salvador.ti,ab.; OR Honduras/; OR Honduras.ti,ab.; OR Nicaragua/; OR Nicaragua.ti,ab.; OR Argentina/; OR (Argentina or Argentine Republic) .ti,ab. ; OR Belize/; OR (Belize or British Honduras) ; OR Brazil/; OR Brazil/; OR Colombia/; OR Colombia.ti,ab.; OR Costa Rica/; OR Costa Rica.ti,ab.; OR Cuba/; OR Cuba.ti,ab.; OR Dominica/; OR Dominica.ti,ab.; OR Dominican Republic/ ; OR Dominican Republic.ti,ab.; OR Ecuador/; OR |

|  |  |                                                                                                                                                                                                                                                                                                                                                                                                                                                                                                                                                                                                                                                                                                                                                                                                                                                                                                                                                                                                                                                                                                                                                                                                                                                                                                                                                                                                                                                                                                                                                                                                                                                                                                                                                                                                                                                                                                                                                                                                                                                                                                                                                                                                                                                                                                                                                                                                                                                                                                                                                                                                                                                                                                                                                                                                                                                                                                                                                                                                                                                                                                                                                                                                                                                                                                                                                                                                                                                                                                                                                                                                                                                                                                                                                                                                                                                                                                                                                                                                                                                                                                                                                                                                |
|--|--|------------------------------------------------------------------------------------------------------------------------------------------------------------------------------------------------------------------------------------------------------------------------------------------------------------------------------------------------------------------------------------------------------------------------------------------------------------------------------------------------------------------------------------------------------------------------------------------------------------------------------------------------------------------------------------------------------------------------------------------------------------------------------------------------------------------------------------------------------------------------------------------------------------------------------------------------------------------------------------------------------------------------------------------------------------------------------------------------------------------------------------------------------------------------------------------------------------------------------------------------------------------------------------------------------------------------------------------------------------------------------------------------------------------------------------------------------------------------------------------------------------------------------------------------------------------------------------------------------------------------------------------------------------------------------------------------------------------------------------------------------------------------------------------------------------------------------------------------------------------------------------------------------------------------------------------------------------------------------------------------------------------------------------------------------------------------------------------------------------------------------------------------------------------------------------------------------------------------------------------------------------------------------------------------------------------------------------------------------------------------------------------------------------------------------------------------------------------------------------------------------------------------------------------------------------------------------------------------------------------------------------------------------------------------------------------------------------------------------------------------------------------------------------------------------------------------------------------------------------------------------------------------------------------------------------------------------------------------------------------------------------------------------------------------------------------------------------------------------------------------------------------------------------------------------------------------------------------------------------------------------------------------------------------------------------------------------------------------------------------------------------------------------------------------------------------------------------------------------------------------------------------------------------------------------------------------------------------------------------------------------------------------------------------------------------------------------------------------------------------------------------------------------------------------------------------------------------------------------------------------------------------------------------------------------------------------------------------------------------------------------------------------------------------------------------------------------------------------------------------------------------------------------------------------------------------------|
|  |  | <p>Ecuador.ti,ab.; OR Grenada/; OR Grenada.ti,ab.; OR Guatemala/; OR Guatemala.ti,ab.; OR Guyana/; OR (Guyana or British Guiana) .ti,ab. ; OR Jamaica/; OR Jamaica.ti,ab.; OR Mexico/; OR (Mexico or United Mexican States) .ti,ab. ; OR Paraguay/; OR Paraguay.ti,ab.; OR Peru/; OR Peru.ti,ab.; OR Saint Lucia/; OR (St Lucia or Saint Lucia or Lyonala or Hewanorra) .ti,ab. ; OR "Saint Vincent and the Grenadines"/; OR (Saint Vincent or St Vincent or Grenadines) .ti,ab. ; OR Suriname/; OR (Suriname or Dutch Guiana) .ti,ab. ; OR Venezuela/; OR Venezuela.ti,ab.; OR Djibouti/; OR (Djibouti or French Somaliland) .ti,ab. ; OR Egypt/; OR Egypt.ti,ab.; OR Morocco/; OR Morocco.ti,ab.; OR Tunisia/; OR Tunisia.ti,ab.; OR (Gaza or West Bank or Palestine) .ti,ab. ; OR Algeria/; OR Algeria.ti,ab.; OR Iran/; OR (Iran or Persia) .ti,ab. ; OR Iraq/; OR (Iraq or Mesopotamia) .ti,ab. ; OR Jordan/; OR Jordan.ti,ab.; OR Lebanon/; OR (Lebanon or Lebanese Republic) .ti,ab. ; OR Libya/; OR Libya.ti,ab.; OR Syria/; OR (Syria or Syrian Arab Republic) .ti,ab. ; OR Yemen/; OR Yemen.ti,ab.; OR Afghanistan/; OR Afghanistan.ti,ab.; OR Nepal/; OR Nepal.ti,ab.; OR Bangladesh/; OR Bangladesh.ti,ab.; OR Bhutan/; OR Bhutan.ti,ab.; OR exp India/; OR India.ti,ab.; OR Pakistan/; OR Pakistan.ti,ab.; OR Maldives.ti,ab.; OR Sri Lanka/; OR (Sri Lanka or Ceylon) ; OR Angola/; OR Angola.ti,ab.; OR Cameroon/; OR (Cameroon or Kamerun or Cameroun) .ti,ab. ; OR Cape Verde/; OR (Cape Verde or Cabo Verde) .ti,ab. ; OR Comoros/; OR (Comoros or Glorioso Islands or Mayotte) .ti,ab. ; OR Congo/; OR (Congo not ((Democratic Republic adj3 Congo) or congo red or crimean-congo)) .ti,ab. ; OR Cote d'Ivoire/; OR (Cote d'Ivoire or Cote d'Ivoire or Ivory Coast) .ti,ab. ; OR Eswatini/; OR (eSwatini or Swaziland) .ti,ab. ; OR Ghana/; OR (Ghana or Gold Coast) ; OR Kenya/; OR (Kenya or East Africa Protectorate) .ti,ab. ; OR Lesotho/; OR (Lesotho or Basutoland) .ti,ab. ; OR Mauritania/; OR Mauritania.ti,ab.; OR Nigeria/; OR Nigeria.ti,ab.; OR (Sao Tome adj2 Principe) ; OR Senegal/; OR Senegal.ti,ab.; OR Sudan/; OR (Sudan not South Sudan) .ti,ab. ; OR Zambia/; OR (Zambia or Northern Rhodesia) .ti,ab.; OR Zimbabwe/; OR (Zimbabwe or Southern Rhodesia) .ti,ab. ; OR Botswana/; OR (Botswana or Bechuanaland or Kalahari) .ti,ab. ; OR Equatorial Guinea/; OR (Equatorial Guinea or Spanish Guinea) .ti,ab. ; OR Gabon/; OR (Gabon or Gabonese Republic) .ti,ab. ; OR Mauritius/; OR (Mauritius or Agalega Islands) .ti,ab. ; OR Namibia/; OR (Namibia or German South West Africa) .ti,ab. ; OR South Africa/; OR (South Africa or Cape Colony or British Bechuanaland or Boer Republics or Zululand or Transvaal or Natalia Republic or Orange Free State) .ti,ab. ; OR Benin/; OR (Benin or Dahomey) Burkina Faso/ (Burkina Faso or Burkina Fasso or Upper Volta) .ti,ab. ; OR Burundi/; OR (Burundi or Ruanda-Urundi) .ti,ab. ; OR Central African Republic/; OR (Central African Republic or Ubangi-Shari) .ti,ab. ; OR Chad/; OR Chad.ti,ab.; OR Democratic Republic of the Congo.ti,ab.; OR (((Democratic Republic or DR) adj2 Congo) or Congo-Kinshasa or Belgian Congo or Zaire or Congo Free State) .ti,ab. ; OR Eritrea/; OR Eritrea.ti,ab.; OR Ethiopia/; OR (Ethiopia or Abyssinia) .ti,ab. ; OR Gambia/; OR Gambia; OR Guinea/; OR (Guinea not (New Guinea or Guinea Pig* or Guinea Fowl or Guinea-Bissau or Portuguese Guinea or Equatorial Guinea)) .ti,ab. ; OR Guinea-Bissau/; OR (Guinea-Bissau or Portuguese Guinea) .ti,ab. ; OR Liberia/; OR Liberia.ti,ab.; OR Madagascar/; OR (Madagascar or Malagasy Republic) .ti,ab.; OR Malawi/; OR (Malawi or Nyasaland) .ti,ab. ; OR Mali/; OR Mali.ti,ab.; OR Mozambique/; OR (Mozambique or Mocambique or Portuguese East Africa) .ti,ab. ; OR Niger/; OR (Niger not (Aspergillus or Peptococcus or Schizothorax or Cruciferae or Gobius or Lasius or Agelastes or Melanosuchus or radish or Parastromateus or Orius or Apergillus or Parastromateus or Stomoxys)) .ti,ab. ; OR Rwanda/; OR (Rwanda or Ruanda) .ti,ab. ; OR Sierra Leone/; OR (Sierra Leone or Salone) .ti,ab.;</p> |
|--|--|------------------------------------------------------------------------------------------------------------------------------------------------------------------------------------------------------------------------------------------------------------------------------------------------------------------------------------------------------------------------------------------------------------------------------------------------------------------------------------------------------------------------------------------------------------------------------------------------------------------------------------------------------------------------------------------------------------------------------------------------------------------------------------------------------------------------------------------------------------------------------------------------------------------------------------------------------------------------------------------------------------------------------------------------------------------------------------------------------------------------------------------------------------------------------------------------------------------------------------------------------------------------------------------------------------------------------------------------------------------------------------------------------------------------------------------------------------------------------------------------------------------------------------------------------------------------------------------------------------------------------------------------------------------------------------------------------------------------------------------------------------------------------------------------------------------------------------------------------------------------------------------------------------------------------------------------------------------------------------------------------------------------------------------------------------------------------------------------------------------------------------------------------------------------------------------------------------------------------------------------------------------------------------------------------------------------------------------------------------------------------------------------------------------------------------------------------------------------------------------------------------------------------------------------------------------------------------------------------------------------------------------------------------------------------------------------------------------------------------------------------------------------------------------------------------------------------------------------------------------------------------------------------------------------------------------------------------------------------------------------------------------------------------------------------------------------------------------------------------------------------------------------------------------------------------------------------------------------------------------------------------------------------------------------------------------------------------------------------------------------------------------------------------------------------------------------------------------------------------------------------------------------------------------------------------------------------------------------------------------------------------------------------------------------------------------------------------------------------------------------------------------------------------------------------------------------------------------------------------------------------------------------------------------------------------------------------------------------------------------------------------------------------------------------------------------------------------------------------------------------------------------------------------------------------------------------|

|           |                     |                                                                                                                                                                                                                                                                                                                                                                                                                                                                                                                                                                            |
|-----------|---------------------|----------------------------------------------------------------------------------------------------------------------------------------------------------------------------------------------------------------------------------------------------------------------------------------------------------------------------------------------------------------------------------------------------------------------------------------------------------------------------------------------------------------------------------------------------------------------------|
|           |                     | OR Somalia/; OR (Somalia or Somaliland) .ti,ab.; OR South Sudan/; OR South Sudan.ti,ab.; OR Tanzania/; OR (Tanzania or Tanganyika or Zanzibar) .ti,ab. ; OR Togo/; OR (Togo or Togolese Republic or Togoland) .ti,ab.; OR Uganda/; OR Uganda.ti,ab.; OR "africa south of the sahara"/; OR africa, central/; OR africa, eastern/; OR africa, southern/; OR africa, western/; OR ("Africa South of the Sahara" or sub-Saharan Africa or subSaharan Africa) .ti,ab. ; OR Central Africa.ti,ab.; OR Eastern Africa.ti,ab.; OR Southern Africa.ti,ab.; OR Western Africa.ti,ab. |
| <b>11</b> | <b>Final search</b> | <b>Term 4 AND Term 10 AND Term 11</b>                                                                                                                                                                                                                                                                                                                                                                                                                                                                                                                                      |

## APPENDIX S2 – STUDIES EXCLUDED AT FULL-TEXT REVIEW STAGE

Table S2 Studies excluded at full-text review stage and reasons for exclusion

| Reference                                                                                                                                                                                                                                                                        | Reason for exclusion                                                       |
|----------------------------------------------------------------------------------------------------------------------------------------------------------------------------------------------------------------------------------------------------------------------------------|----------------------------------------------------------------------------|
| Aaron G. et al. (2016) "Household coverage of fortified staple food commodities in Rajasthan, India." Plos One 2016;11:e0163176.                                                                                                                                                 | Population in need not relevant                                            |
| Aaron, G et al. (2017). "Coverage of large-scale food fortification of edible oil, wheat flour, and maize flour varies greatly by vehicle and country but is consistently lower among the most vulnerable: results from coverage surveys in 8 countries J Nutr 2017;147:984S–94. | Population in need not relevant                                            |
| Abd El Razik, M. S. and Salem, M.R. (2019). "From public health and demographic research to decision making: An intervention study in Giza Governorate-Egypt." Evaluation and Program Planning 77: 101704.                                                                       | Outcome not a population level measure: denominator not population in need |
| Afolabi, R.F., et al. (2021) "Ethnicity as a cultural factor influencing complete vaccination among children aged 12-23 months in Nigeria." Human Vaccines & Immunotherapeutics 17(7): 2008.                                                                                     | No adjustment for quality of care                                          |
| Aina, M., et al. (2017). "Preliminary results from direct-to-facility vaccine deliveries in Kano, Nigeria." Vaccine 35(17): 2175-2182.                                                                                                                                           | Outcome not a population level measure: denominator not population in need |
| Akech, S., et al. (2019). "Magnitude and pattern of improvement in processes of care for hospitalised children with diarrhoea and dehydration in Kenyan hospitals participating in a clinical network." Tropical Medicine & International Health 24(1): 73-80.                   | Outcome not a population level measure: denominator not population in need |
| Alfiah, E., et al. (2019). "Coverage and adherence of weekly iron folic acid supplementation among school going adolescent girls in Indonesia." Annals of Nutrition and Metabolism 75 (3): 324.                                                                                  | Population in need not relevant                                            |
| Allan, S., et al. (2021) "Inequities in childhood immunisation coverage associated with socioeconomic, geographic, maternal, child, and place of birth characteristics in Kenya." BMC Infectious Diseases 21:553.                                                                | No adjustment for quality of care                                          |
| Allen, S. M., et al. (2017). "Measuring facility capability to provide routine and emergency childbirth care to mothers and newborns: An appeal to adjust for delivery caseload of facilities." PLoS ONE [Electronic Resource] 12(10): e0186515.                                 | Outcome not a population level measure: denominator not population in need |
| Ampadu, H. H., et al. (2019). "Prescribing patterns and compliance with World Health Organization recommendations for the management of severe malaria: a modified cohort event monitoring study in public health facilities in Ghana and Uganda." Malaria Journal 18(1): 36.    | Outcome not a population level measure: denominator not population in need |
| Ansari, N., et al. (2020). "Quality of care in prevention, detection and management of postpartum hemorrhage in hospitals in Afghanistan: an observational assessment." BMC Health Services Research 20(1): 484.                                                                 | Relevance                                                                  |
| Arsenault, C., et al. (2021) "Patient volume and quality of primary care in Ethiopia: findings from the routine health information system and the 2014 Service Provision Assessment survey." BMC Health Services Research 21:485.                                                | Outcome not a population level measure: denominator not population in need |
| Ayieko, P., et al. (2019). "Effect of enhancing audit and feedback on uptake of childhood pneumonia treatment policy in hospitals that are part of a clinical network: a cluster randomized trial." Implementation Science 14(1): 20.                                            | Outcome not a population level measure: denominator not population in need |
| Benzaken, C. L., et al. (2020). "Development of a cumulative metric of vaccination adherence behavior and its application among a cohort of 12-month-olds in western Kenya." Vaccine 38(18): 3429-3435.                                                                          | No adjustment for quality of care                                          |
| Bhattacharya, A. A., et al. (2019). "Monitoring childbirth care in primary health facilities: a validity study in Gombe State, northeastern Nigeria." Journal of Global Health 9(2): 020411.                                                                                     | Study type                                                                 |
| Bhura, M., et al. (2020). "Evaluating implementation of "management of Possible Serious Bacterial Infection (PSBI) when referral is not feasible" in primary health care facilities in Sindh province, Pakistan." PLoS ONE [Electronic Resource] 15(10): e0240688.               | Outcome not a population level measure: denominator not population in need |

| Reference                                                                                                                                                                                                                                                                   | Reason for exclusion                                                       |
|-----------------------------------------------------------------------------------------------------------------------------------------------------------------------------------------------------------------------------------------------------------------------------|----------------------------------------------------------------------------|
| Biset, G., et al. (2021) "Full immunization coverage and associated factors among children age 12-23 months in Ethiopia: systematic review and meta-analysis of observational studies." <i>Human Vaccines &amp; Immunotherapeutics</i> 17 (7): 2326.                        | Study type                                                                 |
| Brenner, S., et al. (2017). "Implementation research to improve quality of maternal and newborn health care, Malawi." <i>Bulletin of the World Health Organization</i> 95(7): 491-502.                                                                                      | Outcome not a population level measure: denominator not population in need |
| Buchmann, E. J. (2020). "Quality and readiness for facility-based childbirth in sub-Saharan Africa." <i>BJOG: An International Journal of Obstetrics &amp; Gynaecology</i> 127(12): 1547.                                                                                   | Study type                                                                 |
| Budu, E. et al. (2021). "Maternal healthcare utilization and full immunization coverage among 12–23 months children in Benin: a cross sectional study using population-based data." <i>Archives of Public Health</i> 79:34.                                                 | No adjustment for quality of care                                          |
| Burke, D. (2018). "Advanced distribution of misoprostol for prevention of postpartum hemorrhage at home births in Haiti." <i>International Journal of Gynecology and Obstetrics</i> 143 (Supplement 3): 461.                                                                | Relevance                                                                  |
| Carter, E. D., et al. (2018). "An agent-based model of effective coverage of appropriate management of child illness." <i>American Journal of Tropical Medicine and Hygiene</i> 99 (4 Supplement): 254.                                                                     | Outcome not a population level measure: denominator not population in need |
| Carvajal-Aguirre, L., et al. (2017). "Does health facility service environment matter for the receipt of essential newborn care? Linking health facility and household survey data in Malawi." <i>Journal of Global Health</i> 7(2): 020508.                                | Outcome not a population level measure: denominator not population in need |
| Choi, S., et al. (2020). "Improved care and survival in severe malnutrition through eLearning." <i>Archives of Disease in Childhood</i> 105(1): 32-39.                                                                                                                      | Relevance                                                                  |
| Cohen, J. L., et al. (2020). "Quality of clinical management of children diagnosed with malaria: A cross-sectional assessment in 9 sub-Saharan African countries between 2007-2018." <i>PLoS Medicine / Public Library of Science</i> 17(9): e1003254.                      | Outcome not a population level measure: denominator not population in need |
| Colson, K., et al. (2013). "Comparative estimates of immunisation coverage from three different sources: results from the SM2015 evaluation. <i>Lancet</i> . 2013;381:S32.                                                                                                  | Results presented in another article                                       |
| Colson, K., et al. (2015). "Comparative Estimates of Crude and Effective Coverage of Measles Immunization in Low-Resource Settings-Findings from Salud Mesoamérica 2015." <i>PLoS ONE</i> 10(7): e0130697                                                                   | Outcome not a population level measure: denominator not population in need |
| Daka, D. W., et al. (2020). "Quality of clinical assessment and management of sick children by Health Extension Workers in four regions of Ethiopia: A cross-sectional survey." <i>PLoS ONE [Electronic Resource]</i> 15(9): e0239361.                                      | Outcome not a population level measure: denominator not population in need |
| Das, M. K., et al. (2019). "Impact of Neonatal Resuscitation Capacity Building of Birth Attendants on Stillbirth Rate at Public Health Facilities in Uttar Pradesh, India." <i>Indian pediatrics</i> 56(5): 369-373.                                                        | Outcome not a population level measure: denominator not population in need |
| Day, L. et al. (2021). "Assessment of the validity of the measurement of newborn and maternal health-care coverage in hospitals (EN-BIRTH): an observational study." <i>Lancet Global Health</i> 9: e267.                                                                   | Outcome not a population level measure: denominator not population in need |
| Deming, M.S., et al. (2002) "Tetanus toxoid coverage as an indicator of serological protection against neonatal tetanus". <i>Bull World Health Organ</i> 2002;80:696–703.                                                                                                   | Population in need not relevant                                            |
| Eboreime, E. A., et al. (2019). "Effectiveness of the Diagnose-Intervene- Verify-Adjust (DIVA) model for integrated primary healthcare planning and performance improvement: an embedded mixed methods evaluation in Kaduna state, Nigeria." <i>BMJ Open</i> 9(3): e026016. | Outcome not a population level measure: denominator not population in need |
| Eboreime, E. A., et al. (2019). "Primary healthcare planning, bottleneck analysis and performance improvement: An evaluation                                                                                                                                                | Outcome not a population level measure: denominator not population in need |

| Reference                                                                                                                                                                                                                                                                                                 | Reason for exclusion                                                       |
|-----------------------------------------------------------------------------------------------------------------------------------------------------------------------------------------------------------------------------------------------------------------------------------------------------------|----------------------------------------------------------------------------|
| of processes and outcomes in a Nigerian context." <i>Evaluation &amp; Program Planning</i> 77: 101712.                                                                                                                                                                                                    |                                                                            |
| Engle-Stone, R. et al. (2015). "Estimating the effective coverage of programs to control vitamin a deficiency and its consequences among women and young children in Cameroon. <i>Food Nutr Bull.</i> 2015;36(3 Suppl):S149–71.                                                                           | Study type                                                                 |
| Ezran, C., et al. (2019). "Assessing trends in the content of maternal and child care following a health system strengthening initiative in rural Madagascar: A longitudinal cohort study." <i>PLoS Medicine</i> 16 (8): (no pagination)(e1002869).                                                       | Relevance                                                                  |
| Fink, G., et al. (2020). "Antibiotic exposure among children younger than 5 years in low-income and middle-income countries: a cross-sectional study of nationally representative facility-based and household-based surveys." <i>The Lancet Infectious Diseases</i> 20(2): 179-187.                      | Intervention type                                                          |
| Fisseha, G., et al. (2019). "Quality of intrapartum and newborn care in Tigray, Northern Ethiopia." <i>BMC Pregnancy &amp; Childbirth</i> 19(1): 37.                                                                                                                                                      | Outcome not a population level measure: denominator not population in need |
| Francetic, I., et al. (2019). "Going operational with health systems governance: supervision and incentives to health workers for increased quality of care in Tanzania." <i>Health Policy &amp; Planning</i> 34(Supplement_2): ii77-ii92.                                                                | Outcome not a population level measure: denominator not population in need |
| Fullman, N., et al. (2017). "Measuring progress and projecting attainment on the basis of past trends of the health-related Sustainable Development Goals in 188 countries: an analysis from the Global Burden of Disease Study 2016." <i>The Lancet</i> 390(10100): 1423-1459.                           | No adjustment for quality of care                                          |
| Gage, A. D., et al. (2018). "Does quality influence utilization of primary health care? Evidence from Haiti." <i>Global Health</i> 14(1): 59.                                                                                                                                                             | Relevance                                                                  |
| Gakidou, E., et al. (2006). "Assessing the effect of the 2001–06 Mexican health reform: an interim report card. <i>Lancet</i> (London, England). 2006; 368(9550):1920–35.                                                                                                                                 | No adjustment for quality of care                                          |
| Galstyan, S. H., et al. (2019). "Cross-sectional study of the quality of neonatal care services in Armenia." <i>International journal of health care quality assurance</i> 32(8): 1145-1161.                                                                                                              | Outcome not a population level measure: denominator not population in need |
| Getachew, T., et al. (2020). "Assessing the quality of care in sick child services at health facilities in Ethiopia." <i>BMC Health Services Research</i> 20(1): 574.                                                                                                                                     | Outcome not a population level measure: denominator not population in need |
| Goleman, M. J., et al. (2018). "Quality Improvement Initiative to Improve Human Papillomavirus Vaccine Initiation at 9 Years of Age." <i>Academic Pediatrics</i> 18(7): 769-775.                                                                                                                          | Setting: Columbus, Ohio (USA)                                              |
| Guzha, B. T., et al. (2018). "Assessment of quality of obstetric care in Zimbabwe using the standard primipara." <i>BMC Pregnancy &amp; Childbirth</i> 18(1): 205.                                                                                                                                        | Outcome not a population level measure: denominator not population in need |
| Habte, A. et al. (2021). "Determinants of practice of preconception care among women of reproductive age group in southern Ethiopia, 2020: content analysis." <i>Reproductive Health</i> 18:100.                                                                                                          | Intervention type                                                          |
| Hayford (2013) Measles vaccination coverage estimates from surveys, clinic records, and immune markers in oral fluid and blood: a population-based cross-sectional study                                                                                                                                  | Outcome not a population level measure: denominator not population in need |
| Horwood, C., et al. (2017). "A continuous quality improvement intervention to improve the effectiveness of community health workers providing care to mothers and children: a cluster randomised controlled trial in South Africa." <i>Human Resources for Health [Electronic Resource]</i> 15(1): 39.    | No adjustment for quality of care                                          |
| Huybregts, L., et al. (2019). "Impact on child acute malnutrition of integrating small-quantity lipid-based nutrient supplements into community-level screening for acute malnutrition: A cluster-randomized controlled trial in Mali." <i>PLoS Medicine / Public Library of Science</i> 16(8): e1002892. | No adjustment for quality of care                                          |
| Idzerda, L. (2011). Access to primary healthcare services for the Roma population in Serbia: a secondary data analysis. <i>BMC Int Health Human Rights.</i> 2011;11:10.                                                                                                                                   | No adjustment for quality of care                                          |
| Kamath, A. M., et al. (2020). "Assessing multidimensional care coverage for pre-eclampsia in the era of universal health coverage:                                                                                                                                                                        | Intervention type                                                          |

| Reference                                                                                                                                                                                                                                                                                         | Reason for exclusion                                                       |
|---------------------------------------------------------------------------------------------------------------------------------------------------------------------------------------------------------------------------------------------------------------------------------------------------|----------------------------------------------------------------------------|
| A pre-post evaluation of the Salud Mesoamerica Initiative." International Journal of Gynaecology & Obstetrics 149(3): 318-325.                                                                                                                                                                    |                                                                            |
| Kanyangarara, M. and V. B. Chou (2017). "Linking household surveys and health facility assessments to estimate intervention coverage for the Lives Saved Tool (LiST)." BMC Public Health 17(Suppl 4): 780.                                                                                        | Intervention type                                                          |
| Karim, A., et al. (2020). "A systems approach to assessing complexity in health interventions: an effectiveness decay model for integrated community case management." Global health action 13(1).                                                                                                | Study type                                                                 |
| Kc, A., et al. (2020). "Quality of Care for Maternal and Newborn Health in Health Facilities in Nepal." Maternal & Child Health Journal 24(Suppl 1): 31-38.                                                                                                                                       | Outcome not a population level measure: denominator not population in need |
| Khan, Z., et al. (2000) Coverage and Efficacy of Measles Immunization in Rural Areas of Aligarh                                                                                                                                                                                                   | Outcome not a population level measure: denominator not population in need |
| Khumalo, P. N., et al. (2020). "The Cascade of Care From Routine Point-of-Care HIV Testing at Birth: Results From an 18-Months Pilot Program in Eswatini." Journal of Acquired Immune Deficiency Syndromes (1999) 84(Supplement 1): S22-S27.                                                      | Outcome not a population level measure: denominator not population in need |
| Kim, S. S., et al. (2019). "Behavior Change Interventions Delivered through Interpersonal Communication, Agricultural Activities, Community Mobilization, and Mass Media Increase Complementary Feeding Practices and Reduce Child Stunting in Ethiopia." Journal of Nutrition 149(8): 1470-1481. | No adjustment for quality of care                                          |
| Klootwijk, L., et al. (2019). "Challenges affecting prompt access to adequate uncomplicated malaria case management in children in rural primary health facilities in Chikhwawa Malawi." BMC Health Services Research 19(1): 735.                                                                 | No adjustment for quality of care                                          |
| Koulidiati, J. L., et al. (2018). "Factors associated with effective coverage of child health services in Burkina Faso." Tropical Medicine & International Health 23(11): 1188-1199.                                                                                                              | Duplicate                                                                  |
| Koulidiati, J. L., et al. (2018). "Measuring effective coverage of curative child health services in rural Burkina Faso: a cross-sectional study." BMJ Open 8(5): e020423.                                                                                                                        | Duplicate                                                                  |
| Koulidiati, J-L. et al. (2021). "Impact of Performance-Based Financing on effective coverage for curative child health services in Burkina Faso: Evidence from a quasi-experimental design" Tropical Medicine and International Health 8:1002.                                                    | Results presented in another article                                       |
| Kruk, M. E., et al. (2017). "Variation in quality of primary-care services in Kenya, Malawi, Namibia, Rwanda, Senegal, Uganda and the United Republic of Tanzania." Bulletin of the World Health Organization 95(6): 408-418.                                                                     | Outcome not a population level measure: denominator not population in need |
| Kruk, M. E., et al. (2018). "Content of Care in 15,000 Sick Child Consultations in Nine Lower-Income Countries." Health Services Research 53(4): 2084-2098.                                                                                                                                       | Outcome not a population level measure: denominator not population in need |
| Lama, T. P., et al. (2020). "Assessment of facility and health worker readiness to provide quality antenatal, intrapartum and postpartum care in rural Southern Nepal." BMC Health Services Research 20(1): 16.                                                                                   | Outcome not a population level measure: denominator not population in need |
| Langston, A., et al. (2019). "Testing a simplified tool and training package to improve integrated Community Case Management in Tanganyika Province, Democratic Republic of Congo: a quasi-experimental study." Journal of Global Health 9(1): 010810.                                            | Outcome not a population level measure: denominator not population in need |
| Lansky, S., et al. (2018). "Monitoring care during childbirth to reduce maternal and infant mortality in Belo Horizonte, Brazil." International Journal of Gynecology and Obstetrics 143 (Supplement 3): 494-495.                                                                                 | Not retrieved                                                              |
| Larson, E., et al. (2019). "Effect of a maternal and newborn health system quality improvement project on the use of facilities for childbirth: a cluster-randomised study in rural Tanzania." Tropical Medicine & International Health 24(5): 636-646.                                           | No adjustment for quality of care                                          |
| Lauria, M. E., et al. (2019). "Assessing the Integrated Community-Based Health Systems Strengthening initiative in northern Togo: a                                                                                                                                                               | Study type                                                                 |



| Reference                                                                                                                                                                                                                                                                                                                                                                                        | Reason for exclusion                                                       |
|--------------------------------------------------------------------------------------------------------------------------------------------------------------------------------------------------------------------------------------------------------------------------------------------------------------------------------------------------------------------------------------------------|----------------------------------------------------------------------------|
| pragmatic effectiveness-implementation study protocol." <i>Implementation Science</i> 14(1): 92.                                                                                                                                                                                                                                                                                                 |                                                                            |
| Lazzerini, M., et al. (2017). "Improving the quality of hospital care for children by supportive supervision: a cluster randomized trial, Kyrgyzstan." <i>Bulletin of the World Health Organization</i> 95(6): 397-407.                                                                                                                                                                          | Relevance                                                                  |
| Lazzerini, M., et al. (2019). "Nutritional services for children in Beira, Mozambique: a study reporting on participatory use of data to generate quality improvement recommendations." <i>BMJ open quality</i> 8(4): e000758.                                                                                                                                                                   | Outcome not a population level measure: denominator not population in need |
| Lee, J., et al. (2017). "Strategy for integrated linkages between service delivery and household utilization across programs." <i>Annals of Nutrition and Metabolism</i> 71 (Supplement 2): 115.                                                                                                                                                                                                 | Study type                                                                 |
| Leslie, H. H., et al. (2017). "Association between infrastructure and observed quality of care in 4 healthcare services: A cross-sectional study of 4,300 facilities in 8 countries." <i>PLoS Medicine / Public Library of Science</i> 14(12): e1002464.                                                                                                                                         | Outcome not a population level measure: denominator not population in need |
| Leyvraz, M., et al. (2017). "Coverage of nutrition interventions intended for infants and young children varies greatly across programs: Results from coverage surveys in 5 countries." <i>Journal of Nutrition</i> 147(5): 995S-1003S.                                                                                                                                                          | Results presented in another article                                       |
| Lozano, R., et al. (2006). "Benchmarking of performance of Mexican states with effective coverage. <i>Lancet</i> 2006;368:1729–41.                                                                                                                                                                                                                                                               | Population in need not relevant                                            |
| Lozano, R., et al. (2020). "Measuring universal health coverage based on an index of effective coverage of health services in 204 countries and territories, 1990–2019: a systematic analysis for the Global Burden of Disease Study 2019." <i>The Lancet</i> 396(10258): 1250-1284.                                                                                                             | Study type                                                                 |
| Luo, H., et al. (2016). Predicted effects of current and potential micronutrient intervention programs on adequacy of folate and vitamin B-12 intake in a national sample of women and young children in Cameroon. <i>FASEB J.</i> 2016;30((Luo H.; Stewart C.P.; Brown K.H.; Engle-Stone R.) Program in International and Community Nutrition, University of California, Davis, United States). | Population in need not relevant                                            |
| Manyazewal, T., et al. (2018). "Improving immunization capacity in Ethiopia through continuous quality improvement interventions: a prospective quasi-experimental study." <i>Infectious Diseases of Poverty</i> 7(1): 119.                                                                                                                                                                      | Relevance                                                                  |
| Martinez, S. et al., (2011). "Effective coverage of health interventions in Latin America and the Caribbean: metrics for the assessment of health systems performance. <i>Salud Publica Mex.</i> 2011;53(SUPPL. 2):S78–84                                                                                                                                                                        | Not in English                                                             |
| Maves, K., et al. (2020). "Rapid baseline assessment of peripartum care delivery by skilled birth attendants in rural India." <i>Journal of Investigative Medicine</i> 68 (1): A39.                                                                                                                                                                                                              | Outcome not a population level measure: denominator not population in need |
| McGuire, F., et al. (2021). "The effect of distance on maternal institutional delivery choice: Evidence from Malawi." <i>Health Economics</i> 1:24.                                                                                                                                                                                                                                              | Outcome not a population level measure: denominator not population in need |
| Minta, A. A., et al. (2020). "Seroprevalence of Measles, Rubella, Tetanus, and Diphtheria Antibodies among Children in Haiti, 2017." <i>American Journal of Tropical Medicine &amp; Hygiene</i> 103(4): 1717-1725.                                                                                                                                                                               | Outcome not a population level measure: denominator not population in need |
| Minta, A. et al. (2021). "Hepatitis B surface antigen seroprevalence among children in the Philippines, 2018." <i>Vaccine</i> 39: 1982.                                                                                                                                                                                                                                                          | No adjustment for quality of care                                          |
| Morof, D., et al. (2019). "Addressing the Third Delay in Saving Mothers, Giving Life Districts in Uganda and Zambia: Ensuring Adequate and Appropriate Facility-Based Maternal and Perinatal Health Care." <i>Global Health Science &amp; Practice</i> 7(Suppl 1): S85-S103.                                                                                                                     | Outcome not a population level measure: denominator not population in need |
| Mothupi, M. C., et al. (2018). "Measurement approaches in continuum of care for maternal health: a critical interpretive synthesis of evidence from LMICs and its implications for the South African context." <i>BMC Health Services Research</i> 18(1): 539.                                                                                                                                   | Study type                                                                 |

| Reference                                                                                                                                                                                                                                                                                                                | Reason for exclusion                                                       |
|--------------------------------------------------------------------------------------------------------------------------------------------------------------------------------------------------------------------------------------------------------------------------------------------------------------------------|----------------------------------------------------------------------------|
| Mukamurigo, J., et al. (2019). "Quality of intrapartum care for healthy women with spontaneous onset of labour in Rwanda: A health facility-based, cross-sectional study." <i>Sexual &amp; reproductive healthcare : official journal of the Swedish Association of Midwives</i> 19: 78-83.                              | Outcome not a population level measure: denominator not population in need |
| Munabi-Babigumira, S., et al. (2019). "Implementing the skilled birth attendance strategy in Uganda: a policy analysis." <i>BMC Health Services Research</i> 19(1): 655.                                                                                                                                                 | Study type                                                                 |
| Munos, M. K., et al. (2017). "Improving coverage measurement for reproductive, maternal, neonatal and child health: gaps and opportunities." <i>Journal of Global Health</i> 7(1): 010801.                                                                                                                               | Study type                                                                 |
| Mutua, M., et al. (2021). "Inequities in On-Time Childhood Vaccination: Evidence From Sub-Saharan Africa." <i>Americal Journal of Preventive Medicine</i> 60(1S1):S11.                                                                                                                                                   | No adjustment for quality of care                                          |
| Mwapasa, V., et al. (2017). "Impact of Mother-Infant Pair Clinics and Short-Text Messaging Service (SMS) Reminders on Retention of HIV-Infected Women and HIV-Exposed Infants in eMTCT Care in Malawi: A Cluster Randomized Trial." <i>Journal of Acquired Immune Deficiency Syndromes: JAIDS</i> 75 Suppl 2: S123-S131. | Outcome not a population level measure: denominator not population in need |
| Mwita, S. K., et al. (2019). "Engagement of National Stakeholders and Communities on Health-Care Quality Improvement: Experience from the Implementation of the Partnership for HIV-Free Survival in Tanzania." <i>Journal of the International Association of Providers of AIDS Care</i> 18: 2325958219847454.          | Outcome not a population level measure: denominator not population in need |
| Nagar, R., et al. (2018). "A cluster randomized trial to determine the effectiveness of a novel, digital pendant and voice reminder platform on increasing infant immunization adherence in rural Udaipur, India." <i>Vaccine</i> 36(44): 6567-6577.                                                                     | Outcome not a population level measure: denominator not population in need |
| Nanthavong (2015) Diphtheria in Lao PDR: Insufficient Coverage or Ineffective Vaccine?                                                                                                                                                                                                                                   | Outcome not a population level measure: denominator not population in need |
| Ngoma, T., et al. (2019). "Addressing the Second Delay in Saving Mothers, Giving Life Districts in Uganda and Zambia: Reaching Appropriate Maternal Care in a Timely Manner." <i>Global Health Science &amp; Practice</i> 7(Suppl 1): S68-S84.                                                                           | Outcome not a population level measure: denominator not population in need |
| Nguyen, P. H., et al. (2018). "Importance of coverage and quality for impact of nutrition interventions delivered through an existing health programme in Bangladesh." <i>Maternal &amp; Child Nutrition</i> 14(4): e12613.                                                                                              | Relevance                                                                  |
| Nguyen, P., et al. (2020). "Quality-Adjusted Coverage of Nutrition Interventions Across the Continuum of Care: Insights from Household and Health Facility Data in Bangladesh." <i>Current Developments in Nutrition</i> 4(Suppl 2): 254-254.                                                                            | Abstract, insufficient data                                                |
| Nikiema (2017) Effectiveness of facility-based personalized maternal nutrition counseling in improving child growth and morbidity up to 18 months: A cluster-randomized controlled trial in                                                                                                                              | Relevance                                                                  |
| Odjidja, E. N., et al. (2019). "Delivery of integrated infectious disease control services under the new antenatal care guidelines: a service availability and readiness assessment of health facilities in Tanzania." <i>BMC Health Services Research</i> 19(1): 153.                                                   | Outcome not a population level measure: denominator not population in need |
| Ojha, C. R., et al. (2017). "Impact of mass drug administration for elimination of lymphatic filariasis in Nepal." <i>PLoS Neglected Tropical Diseases [electronic resource]</i> 11(7): e0005788.                                                                                                                        | Relevance                                                                  |
| Okawa, S., et al. (2019). "Effect of continuum-of-care intervention package on improving contacts and quality of maternal and newborn healthcare in Ghana: A cluster randomised controlled trial." <i>BMJ Open</i> 9 (9) (no pagination)(e025347).                                                                       | Outcome not a population level measure: denominator not population in need |
| Oresanya, O., et al. (2019). "Effect of community-based intervention on improving access to treatment for sick under-five children in hard-to-reach communities in Niger State, Nigeria." <i>Journal of Global Health</i> 9(1): 010803.                                                                                  | No adjustment for quality of care                                          |
| Owili, P. O., et al. (2017). "Quality of maternity care and its determinants along the continuum in Kenya: A structural equation modeling analysis." <i>PLoS ONE [Electronic Resource]</i> 12(5): e0177756                                                                                                               | Outcome not a population level measure: denominator not population in need |

| Reference                                                                                                                                                                                                                                                                     | Reason for exclusion                                                       |
|-------------------------------------------------------------------------------------------------------------------------------------------------------------------------------------------------------------------------------------------------------------------------------|----------------------------------------------------------------------------|
| Page-Shipp, L., et al. (2018). "Household point of care CD4 testing and isoniazid preventive therapy initiation in a household TB contact tracing programme in two districts of South Africa." PLoS ONE [Electronic Resource] 13(3): e0192089.                                | Intervention type                                                          |
| Pallangyo, E., et al. (2017). "Improved postpartum care after a participatory facilitation intervention in Dar es Salaam, Tanzania: a mixed method evaluation." Glob Health Action 10(1): 1295697.                                                                            | Outcome not a population level measure: denominator not population in need |
| Pugliese-Garcia, M., et al. (2020). "Childbirth care in Egypt: a repeat cross-sectional analysis using Demographic and Health Surveys between 1995 and 2014 examining use of care, provider mix and immediate postpartum care content." BMC Pregnancy & Childbirth 20(1): 46. | Outcome not a population level measure: denominator not population in need |
| Qazi, U., et al. (2019). "Compliance to timely vaccination in an Expanded Program on Immunization center of Pakistan." Vaccine 37(32): 4618-4622.                                                                                                                             | Outcome not a population level measure: denominator not population in need |
| Rajbhandari, S. P., et al. (2017). "Postpartum hemorrhage prevention in Nepal: a program assessment." BMC Pregnancy & Childbirth 17(1): 169.                                                                                                                                  | Relevance                                                                  |
| Ram, P. K., et al. (2017). "Coverage gaps in early initiation of breastfeeding among newborns, sub-saharan Africa, 2010-2015." American Journal of Tropical Medicine and Hygiene 97 (5 Supplement 1): 285.                                                                    | Abstract, insufficient data                                                |
| Randive, B.B., (2013). Effective coverage of institutional deliveries under the Janani Suraksha Yojana programme in high maternal mortality provinces of India: analysis of data from an annual health survey. Lancet. 2013;381:S32.                                          | Abstract, insufficient data                                                |
| Razavi-Shearer, D., et al. (2018). "Global prevalence, treatment, and prevention of hepatitis B virus infection in 2016: a modelling study." The Lancet Gastroenterology & Hepatology 3(6): 383-403                                                                           | Relevance                                                                  |
| Rivera, D., et al. (2017). "Integrated community case management (iCCM) of childhood infection saves lives in hard-to-reach communities in Nicaragua." Pan American Journal of Public Health 41: e66                                                                          | Outcome not a population level measure: denominator not population in need |
| Rogers, E., et al. (2018). "Quality of care of treatment for uncomplicated severe acute malnutrition provided by lady health workers in Pakistan." Public Health Nutrition 21(2): 385-390.                                                                                    | Outcome not a population level measure: denominator not population in need |
| Saaka, M., et al. (2018). "Prevalence and determinants of essential newborn care practices in the Lawra District of Ghana." BMC Pediatrics 18(1): 173.                                                                                                                        | No adjustment for quality of care                                          |
| Sally, E. T. and E. Kenu (2017). "Evaluation of access and utilization of EPI services amongst children 12-23 months in Kwahu Afram Plains, Eastern region, Ghana." The Pan African medical journal 28: 238.                                                                  | No adjustment for quality of care                                          |
| Sami, S., et al. (2018). "Understanding health systems to improve community and facility level newborn care among displaced populations in South Sudan: a mixed methods case study." BMC Pregnancy & Childbirth 18(1): 325                                                    | Outcome not a population level measure: denominator not population in need |
| Sanjel, K., et al. (2019). "Patterns and determinants of essential neonatal care utilization among underprivileged ethnic groups in Midwest Nepal: a mixed method study." BMC Pregnancy & Childbirth 19(1): 310.                                                              | Relevance                                                                  |
| Semrau, K. E. A., et al. (2017). "Outcomes of a Coaching-Based WHO Safe Childbirth Checklist Program in India." New England Journal of Medicine 377(24): 2313-2324.                                                                                                           | Outcome not a population level measure: denominator not population in need |
| Serván-Mori, E., et al. (2019). "Improving the effective maternal-child health care coverage through synergies between supply and demand-side interventions: Evidence from Mexico." Journal of Global Health 9(2).                                                            | Intervention type                                                          |
| Sharma, J., et al. (2018). "Can India's primary care facilities deliver? A cross-sectional assessment of the Indian public health system's capacity for basic delivery and newborn services." BMJ Open 8(6): e020532.                                                         | Outcome not a population level measure: denominator not population in need |
| Sheffel, A., et al. (2019). "Methods for analysis of complex survey data: an application using the Tanzanian 2015 Demographic and                                                                                                                                             | Intervention type                                                          |

| Reference                                                                                                                                                                                                                                                                                      | Reason for exclusion                                                       |
|------------------------------------------------------------------------------------------------------------------------------------------------------------------------------------------------------------------------------------------------------------------------------------------------|----------------------------------------------------------------------------|
| Health Survey and Service Provision Assessment." <i>Journal of Global Health</i> 9(2): 020902.                                                                                                                                                                                                 |                                                                            |
| Sindelar, K., et al. (2020). "Beyond the facility: An evaluation of seven community-based pediatric HIV testing strategies and linkage to care outcomes in a high prevalence, resource-limited setting." <i>PLoS ONE [Electronic Resource]</i> 15(9): e0236985.                                | Outcome not a population level measure: denominator not population in need |
| Sitrin, D., et al. (2017). "Evidence from household surveys for measuring coverage of newborn care practices." <i>Journal of Global Health</i> 7(2): 020503.                                                                                                                                   | Outcome not a population level measure: denominator not population in need |
| Soremekun, S., et al. (2018). "Variation in the quality and out-of-pocket cost of treatment for childhood malaria, diarrhoea, and pneumonia: Community and facility based care in rural Uganda." <i>PLoS ONE [Electronic Resource]</i> 13(11): e0200543.                                       | Relevance                                                                  |
| Tang, X., et al. (2017). "Timeliness and completeness of measles vaccination among children in rural areas of Guangxi, China: A stratified three-stage cluster survey." <i>Journal of Epidemiology</i> 27: 317e324.                                                                            | No adjustment for quality of care                                          |
| Tariku, A., et al. (2020). "Prevention and treatment of suspected pneumonia in Ethiopian children less than five years from household to primary care." <i>Acta Paediatrica, International Journal of Paediatrics</i> .                                                                        | Relevance                                                                  |
| Taylor, C., et al. (2019). "Examination of malaria service utilization and service provision: an analysis of DHS and SPA data from Malawi, Senegal, and Tanzania." <i>Malaria Journal</i> 18(1): 258.                                                                                          | Relevance                                                                  |
| Teasdale, C. A., et al. (2017). "High risk of loss to follow-up among South African children on ART during transfer, a retrospective cohort analysis with community tracing." <i>Journal of the International AIDS Society</i> 20(1): 21748.                                                   | Outcome not a population level measure: denominator not population in need |
| Thapa Pachya, A., et al. (2020). "Newborn Service Readiness of Primary Level Health Facilities of Eastern Mountain Region of Nepal." <i>Journal of Nepal Health Research Council</i> 17(4): 431-436.                                                                                           | Outcome not a population level measure: denominator not population in need |
| Thiam, S., et al. (2019). "Knowledge and practices of mothers and caregivers on diarrhoeal management among under 5-year-old children in a medium-size town of Senegal." <i>Acta Tropica</i> 194: 155-164.                                                                                     | No adjustment for quality of care                                          |
| Tippins, A., et al. (2017). "Timeliness of childhood vaccination in the Federated States of Micronesia." <i>Vaccine</i> 35: 6404.                                                                                                                                                              | No adjustment for quality of care                                          |
| Tomlin, K., et al. (2020). "Assessing capacity of health facilities to provide routine maternal and newborn care in low-income settings: what proportions are ready to provide good-quality care, and what proportions of women receive it?" <i>BMC Pregnancy &amp; Childbirth</i> 20(1): 289. | Outcome not a population level measure: denominator not population in need |
| Travassos (2016) Immunization Coverage Surveys and Linked Biomarker Serosurveys in Three Regions in Ethiopia                                                                                                                                                                                   | Outcome not a population level measure: denominator not population in need |
| Tripura, R., et al. (2018). "A Controlled Trial of Mass Drug Administration to Interrupt Transmission of Multidrug-Resistant Falciparum Malaria in Cambodian Villages." <i>Clinical Infectious Diseases</i> 67(6): 817-826.                                                                    | Relevance                                                                  |
| Tumilowicz, A., et al. (2019). "Bottlenecks and predictors of coverage and adherence outcomes for a micronutrient powder program in Ethiopia." <i>Maternal &amp; Child Nutrition</i> 15(S5): e12807.                                                                                           | No adjustment for quality of care                                          |
| Tumilowicz, A., et al. (2019). "Mixed methods evaluation explains bypassing of vouchers in micronutrient powder trial in Mozambique." <i>Maternal &amp; Child Nutrition</i> 15(S5): e12718.                                                                                                    | No adjustment for quality of care                                          |
| Ugwa, E., et al. (2018). "Use of maternal and newborn data for decision making by health workers in Ebonyi and Kogi, Nigeria." <i>International Journal of Gynecology and Obstetrics</i> 143 (Supplement 3): 508-509.                                                                          | Intervention type                                                          |
| van den Ent, M. M. V. X., et al. (2017). "Equity and immunization supply chain in Madagascar." <i>Vaccine</i> 35(17): 2148-2154.                                                                                                                                                               | Study type                                                                 |
| Wang, W., et al. (2017). "Limited Service Availability, Readiness, and Use of Facility-Based Delivery Care in Haiti: A Study Linking Health Facility Data and Population Data." <i>Global health, science and practice</i> 5(2): 244-260.                                                      | Results presented in later article                                         |

| Reference                                                                                                                                                                                                                                                                                | Reason for exclusion                                                       |
|------------------------------------------------------------------------------------------------------------------------------------------------------------------------------------------------------------------------------------------------------------------------------------------|----------------------------------------------------------------------------|
| Wangdi, K., et al. (2014). "Prevalence of asymptomatic malaria and bed net ownership and use in Bhutan, 2013: a country earmarked for malaria elimination." <i>Malar J</i> 2014;13.                                                                                                      | No adjustment for quality of care                                          |
| Wanzira, H., et al. (2018). "Quality of care for children with acute malnutrition at health center level in Uganda: a cross sectional study in West Nile region during the refugee crisis." <i>BMC Health Services Research</i> 18(1): 561.                                              | Relevance                                                                  |
| Wehrmeister, F. C., et al. (2020). "Wealth-related inequalities in the coverage of reproductive, maternal, newborn and child health interventions in 36 countries in the African Region." <i>Bulletin of the World Health Organization</i> 98(6): 394-405.                               | No adjustment for quality of care                                          |
| Wiens, K. E., et al. (2019). "Geographic variation in oral rehydration therapy coverage in low-and middle-income countries, 2000-2017." <i>American Journal of Tropical Medicine and Hygiene</i> 101 (5 Supplement): 399.                                                                | No adjustment for quality of care                                          |
| Wilson, N. (2019). "At-scale evidence from 26 national household surveys on the prevention of mother-to-child transmission of HIV cascade." <i>Health Policy &amp; Planning</i> 34(7): 514-519.                                                                                          | No adjustment for quality of care                                          |
| Wiradnyani, L. A. A., et al. (2019). "Behind the low and high coverage of vitamin a supplementation program among children 6-59 months in six provinces of Indonesia." <i>Annals of Nutrition and Metabolism</i> 75 (3): 392.                                                            | Abstract, insufficient data                                                |
| Woldeamanuel, B. T. (2020). "Trends and factors associated to early initiation of breastfeeding, exclusive breastfeeding and duration of breastfeeding in Ethiopia: evidence from the Ethiopia Demographic and Health Survey 2016." <i>International Breastfeeding Journal</i> 15(1): 3. | No adjustment for quality of care                                          |
| Xu, W.-b., et al. (2020). "Investigation and analysis of antibody levels of hepatitis A among children before and after implementing the Expanded National Immunization Program in China." <i>Vaccine</i> 38(4): 878-881.                                                                | Outcome not a population level measure: denominator not population in need |
| Yan, L. D., et al. (2018). "Equity dimensions of the availability and quality of reproductive, maternal and neonatal health services in Zambia." <i>Tropical Medicine &amp; International Health</i> 23(4): 433-445.                                                                     | Outcome not a population level measure: denominator not population in need |
| Yawson, A. E., et al. (2017). "Regional disparities in immunization services in Ghana through a bottleneck analysis approach: Implications for sustaining national gains in immunization." <i>Archives of Public Health</i> 75(1).                                                       | Relevance                                                                  |
| Yawson, A. E., et al. (2017). "The lancet series nutritional interventions in Ghana: a determinants analysis approach to inform nutrition strategic planning." <i>BMC Nutr.</i> 3:27.(doi): 10.1186/s40795-40017-40147-40791. eCollection 42017.                                         | Relevance                                                                  |
| Yugbare Belemsaga, D., et al. (2018). "Integration of postpartum care into child health and immunization services in Burkina Faso: findings from a cross-sectional study." <i>Reproductive Health</i> 15(1): 171.                                                                        | Relevance                                                                  |
| Zhang, L., et al. (2018). "Analysis of sero-epidemiological characteristics of varicella in healthy children in Jiangsu Province, China." <i>BMC Infectious Diseases</i> 18(1): 563.                                                                                                     | Study type                                                                 |

## APPENDIX S3 – OVERVIEW OF INCLUDED STUDIES

Table S3 Overview of included studies

| Reference                               | Intervention/service                                                                                                                                                                                   | Setting                                                                        | Study aim(s)                                                                                                                                                                      | Indicator                                                                                                                                                                                                                                                                                                                                                                                                                                                                                                                                                  | Numerator                                                                                                    | Denominator                                                                                                                                                                                                            | Data source(s)                                                                                  |                                                                                                                                                                    | Quality measure(s)<br>(see Appendix D for individual items)                                                                                                                                                                                                                                                                                                                                                                                                                                                                                                                      | How quality measures derived                                                | Results presented                                                                                                                                                                                                                                                                          | Limitations of EC measure reported by author                                                                                                                                                                                                                       |
|-----------------------------------------|--------------------------------------------------------------------------------------------------------------------------------------------------------------------------------------------------------|--------------------------------------------------------------------------------|-----------------------------------------------------------------------------------------------------------------------------------------------------------------------------------|------------------------------------------------------------------------------------------------------------------------------------------------------------------------------------------------------------------------------------------------------------------------------------------------------------------------------------------------------------------------------------------------------------------------------------------------------------------------------------------------------------------------------------------------------------|--------------------------------------------------------------------------------------------------------------|------------------------------------------------------------------------------------------------------------------------------------------------------------------------------------------------------------------------|-------------------------------------------------------------------------------------------------|--------------------------------------------------------------------------------------------------------------------------------------------------------------------|----------------------------------------------------------------------------------------------------------------------------------------------------------------------------------------------------------------------------------------------------------------------------------------------------------------------------------------------------------------------------------------------------------------------------------------------------------------------------------------------------------------------------------------------------------------------------------|-----------------------------------------------------------------------------|--------------------------------------------------------------------------------------------------------------------------------------------------------------------------------------------------------------------------------------------------------------------------------------------|--------------------------------------------------------------------------------------------------------------------------------------------------------------------------------------------------------------------------------------------------------------------|
|                                         |                                                                                                                                                                                                        |                                                                                |                                                                                                                                                                                   |                                                                                                                                                                                                                                                                                                                                                                                                                                                                                                                                                            |                                                                                                              |                                                                                                                                                                                                                        | Household                                                                                       | Facility/provider                                                                                                                                                  |                                                                                                                                                                                                                                                                                                                                                                                                                                                                                                                                                                                  |                                                                             |                                                                                                                                                                                                                                                                                            |                                                                                                                                                                                                                                                                    |
| Aaron et al. 2016 (63)                  | Nutrition: Complementary Feeding Supplement                                                                                                                                                            | 1 district in the Northern Region & 3 districts in the Eastern Region of Ghana | To assess the effectiveness of the two sales-based approaches to distributing a complementary food supplement to infants and young children.                                      | Effective Coverage: the proportion of children aged 6 to 24 months whose caregiver fed the child the product at least once in the previous 7 days.                                                                                                                                                                                                                                                                                                                                                                                                         | Number of children who consumed the product in the last 7 days.                                              | Children aged between 6 and 24 months.<br><br>(1) all children used as a measure of overall programme performance<br>(2) all children defined as at risk used as a measure of how well delivery model addressed needs. | <ul style="list-style-type: none"> <li>Household survey</li> <li>date n/r</li> </ul>            | n/a                                                                                                                                                                | Receipt and timing of supplement based on caregiver's self-report<br><br><i>Binary: taken as prescribed vs. not</i>                                                                                                                                                                                                                                                                                                                                                                                                                                                              | None given, adapted Tanahashi's model.                                      | <ul style="list-style-type: none"> <li>Coverage measures, 3 steps: message coverage, contact coverage, &amp; effective coverage</li> </ul>                                                                                                                                                 | None given                                                                                                                                                                                                                                                         |
| Baker et al. 2015 (55)<br>* EQUIP study | (1) Childbirth: use of partograph to monitor labour<br><br>(2) Childbirth: active management of third stage of labour (AMTSL)<br><br>(3) Postpartum care in a health facility within 48hrs of delivery | 2 rural districts in Tanzania                                                  | To estimate effective coverage of maternal and newborn health interventions & identify bottlenecks in their implementation in rural districts of the United Republic of Tanzania. | Effective coverage: the proportion of mothers who used a health facility that was ready to deliver the intervention and who actually received the intervention.<br><br>(1) Proportion who satisfy the definition for availability coverage and who used a facility in which a health worker reported using a partograph during the last delivery attended.<br><br>(2) Proportion who satisfy the definition for availability coverage and who used a facility in which a health worker reported giving an oxytocic agent during the last delivery attended | Number of women who gave birth in HF that was able to deliver the intervention and received the intervention | All women aged 13-49 yrs with live birth in previous 12mths                                                                                                                                                            | <ul style="list-style-type: none"> <li>Household survey</li> <li>Nov 2011 – Dec 2012</li> </ul> | <ul style="list-style-type: none"> <li>Facility survey</li> <li>incl. interview with HCW on actions taken during last delivery</li> <li>April-July 2012</li> </ul> | Availability of human resources, drugs & equipment needed to deliver intervention & receipt of interventions based on HCW reports.<br><br>(1) partograph available & HCW reported using a partograph during the last delivery attended<br><br>(2) sterile syringes & needles and oxytocin or ergometrine available & HCW reported giving an oxytocic agent during the last delivery attended<br><br>(3) offering postpartum care with iron supplements available & women reported being checked within 48 hours of delivery<br><br><i>Binary: all components present vs. not</i> | None given, adapted Tanahashi's model to develop an implementation pathway. | <ul style="list-style-type: none"> <li>Implementation pathway, 4 steps: target population, accessibility coverage (timely utilisation of a health facility), availability coverage (health facility readiness) and effective coverage (receives the interventions as intended).</li> </ul> | Indicators chosen affect the coverage estimates. Used indicators that reflected only the minimum conditions required for judging completeness of implementation. HCW reports of actions taken subject to social desirability bias, could result in over reporting. |

| Reference                         | Intervention/service                                                  | Setting                                                                   | Study aim(s)                                                                                                                                                                                                                                                                                                                                                                                                    | Indicator                                                                                                                                                               | Numerator                                                                                | Denominator                                                                                             | Data source(s)                                                                                      |                                                                                                                                                                                | Quality measure(s)<br>(see Appendix D for individual items)                                                                                                                                                                                                               | How quality measures derived                                    | Results presented                                                                                                                                                                               | Limitations of EC measure reported by author                                                                                                                                                                                                                                                                                                 |
|-----------------------------------|-----------------------------------------------------------------------|---------------------------------------------------------------------------|-----------------------------------------------------------------------------------------------------------------------------------------------------------------------------------------------------------------------------------------------------------------------------------------------------------------------------------------------------------------------------------------------------------------|-------------------------------------------------------------------------------------------------------------------------------------------------------------------------|------------------------------------------------------------------------------------------|---------------------------------------------------------------------------------------------------------|-----------------------------------------------------------------------------------------------------|--------------------------------------------------------------------------------------------------------------------------------------------------------------------------------|---------------------------------------------------------------------------------------------------------------------------------------------------------------------------------------------------------------------------------------------------------------------------|-----------------------------------------------------------------|-------------------------------------------------------------------------------------------------------------------------------------------------------------------------------------------------|----------------------------------------------------------------------------------------------------------------------------------------------------------------------------------------------------------------------------------------------------------------------------------------------------------------------------------------------|
|                                   |                                                                       |                                                                           |                                                                                                                                                                                                                                                                                                                                                                                                                 |                                                                                                                                                                         |                                                                                          |                                                                                                         | Household                                                                                           | Facility/provider                                                                                                                                                              |                                                                                                                                                                                                                                                                           |                                                                 |                                                                                                                                                                                                 |                                                                                                                                                                                                                                                                                                                                              |
|                                   |                                                                       |                                                                           |                                                                                                                                                                                                                                                                                                                                                                                                                 | (3) Proportion who satisfy the definition for availability coverage and who report being checked within 48 hours of delivery                                            |                                                                                          |                                                                                                         |                                                                                                     |                                                                                                                                                                                |                                                                                                                                                                                                                                                                           |                                                                 |                                                                                                                                                                                                 |                                                                                                                                                                                                                                                                                                                                              |
| Carter et al. 2018 (45)           | Sick child care: treatment for diarrhoea, fever, ARI or a combination | 1 province in Zambia; two urban and three rural health facility catchment | To assess the feasibility of collecting geographically and temporally concurrent household and health care provider data at a small scale in both an urban and rural setting to perform exact-match linking. To quantify the degree of bias introduced by using less rigorous linking methods, including multiple ecological linking methods and utilization of facility-only health care provider assessments. | Input based effective coverage: average structural quality experienced by all sick children (based on their reported care-seeking behaviour and linked source of care). | Structural quality score of either specific reported source of care or nearest provider. | All children under 5 reported to have at least one DHS illness (diarrhoea, fever, ARI or a combination) | <ul style="list-style-type: none"> <li>Household survey based on DHS</li> <li>March 2016</li> </ul> | <ul style="list-style-type: none"> <li>Provider assessment based on SARA.</li> <li>HCW knowledge assessed using clinical case scenarios.</li> <li>Jan – March 2016.</li> </ul> | Structural quality, 6 domains: (i) diagnostics, (ii) basic medicines, (iii) severe/complicated illness medicines, (iv) human resources, (v) availability of services, commodities, and (vi) HCW knowledge.<br><br><i>Average score: equal weight given to each domain</i> | None given, authors state selected the minimum inputs required. | <ul style="list-style-type: none"> <li>Composite measure</li> <li>EC estimates presented by different linking approaches</li> </ul>                                                             | Measure based on facility capacity to provide care; no measure of process quality or quantitative health gain. Indicators were considered the minimum inputs for appropriate care: the basic commodities required to diagnosis and treat common child illness, along with the human resources and clinical knowledge to apply them correctly |
| Carvajal-Aguirre et al. 2017 (31) | Postnatal care within 48 hours                                        | 17 countries in sub-Saharan Africa                                        | To analyse the co-coverage of content interventions used as proxy for quality of care received by women during antenatal care and by the newborn during postnatal period using data from                                                                                                                                                                                                                        | Content coverage: Percentage of women with a live birth in last 2 years who were attended by a skilled birth attendant and received all 7 content interventions         | Attended by a skilled birth attendant and received all 7 content interventions           | Women with a surviving infant under 2 yrs                                                               | <ul style="list-style-type: none"> <li>DHS</li> <li>2010 - 2015</li> </ul>                          | n/a                                                                                                                                                                            | Receipt of 7 interventions based on women's self-reports<br><br><i>Binary: all components present vs. not</i>                                                                                                                                                             | None given                                                      | <ul style="list-style-type: none"> <li>Composite score</li> <li>Compares gap between contact and content coverage for each intervention separately and all 7 interventions combined.</li> </ul> | Only able to include interventions available in HH survey across countries included. Measures based on mother's recall of care, may be subject to recall bias.                                                                                                                                                                               |

| Reference                 | Intervention/service                                                                                                                                                                                    | Setting | Study aim(s)                                                                                                                                                                                        | Indicator                                                                                                                    | Numerator                                                                                                                                                                                                                                                                                                                                                        | Denominator                                                                                                                                                                                                                                                                                                                                 | Data source(s)                                                                 |                                                                     | Quality measure(s)<br>(see Appendix D for individual items)                                                                                                                                                                                                                                                                                                                                                                                 | How quality measures derived                                                                                                                                                                                                                                                                                               | Results presented                                                                                                                                                       | Limitations of EC measure reported by author                                                                                                                                                                                                                                                                                                                                                                                                                                                             |
|---------------------------|---------------------------------------------------------------------------------------------------------------------------------------------------------------------------------------------------------|---------|-----------------------------------------------------------------------------------------------------------------------------------------------------------------------------------------------------|------------------------------------------------------------------------------------------------------------------------------|------------------------------------------------------------------------------------------------------------------------------------------------------------------------------------------------------------------------------------------------------------------------------------------------------------------------------------------------------------------|---------------------------------------------------------------------------------------------------------------------------------------------------------------------------------------------------------------------------------------------------------------------------------------------------------------------------------------------|--------------------------------------------------------------------------------|---------------------------------------------------------------------|---------------------------------------------------------------------------------------------------------------------------------------------------------------------------------------------------------------------------------------------------------------------------------------------------------------------------------------------------------------------------------------------------------------------------------------------|----------------------------------------------------------------------------------------------------------------------------------------------------------------------------------------------------------------------------------------------------------------------------------------------------------------------------|-------------------------------------------------------------------------------------------------------------------------------------------------------------------------|----------------------------------------------------------------------------------------------------------------------------------------------------------------------------------------------------------------------------------------------------------------------------------------------------------------------------------------------------------------------------------------------------------------------------------------------------------------------------------------------------------|
|                           |                                                                                                                                                                                                         |         |                                                                                                                                                                                                     |                                                                                                                              |                                                                                                                                                                                                                                                                                                                                                                  |                                                                                                                                                                                                                                                                                                                                             | Household                                                                      | Facility/provider                                                   |                                                                                                                                                                                                                                                                                                                                                                                                                                             |                                                                                                                                                                                                                                                                                                                            |                                                                                                                                                                         |                                                                                                                                                                                                                                                                                                                                                                                                                                                                                                          |
|                           |                                                                                                                                                                                                         |         | nationally representative surveys. To compare this co-coverage estimate with the global coverage indicators assessing contacts with health system to highlight the gap between contact and content. |                                                                                                                              |                                                                                                                                                                                                                                                                                                                                                                  |                                                                                                                                                                                                                                                                                                                                             |                                                                                |                                                                     |                                                                                                                                                                                                                                                                                                                                                                                                                                             |                                                                                                                                                                                                                                                                                                                            |                                                                                                                                                                         |                                                                                                                                                                                                                                                                                                                                                                                                                                                                                                          |
| Hategeka et al. 2020 (52) | (1) Postpartum check-up before discharge<br><br>(2) Sick child care: treatment of suspected pneumonia<br><br>(3) Sick child care: treatment of diarrhoea<br><br>(4) Sick child care: treatment of fever | Rwanda  | To assess effective coverage of MCH services in Rwanda, equity in effective coverage and its subnational distribution over the MDG era.                                                             | Effective coverage: Proportion of individuals in need of MCH services who used the service and received quality MCH services | (1) Number women who delivered in a facility & were examined or asked about their health within 1 hour of delivery<br><br>(2) Number children received antibiotics when seeking care at a facility for symptoms of pneumonia<br><br>(3) Number children received ORT when seeking care at a facility for diarrhoea<br><br>(4) Number children tested for malaria | (1) Women aged 15-49 yrs with 1+ births in preceding 5yrs, whose most recent pregnancy lead to a live birth<br><br>(2) All children <5 who, in the past 2 weeks, suffered from symptoms consistent with pneumonia<br><br>(3) All children <5 who had diarrhoea in past 2 wks<br><br>(4) All children <5 yrs who had fever in the past 2 wks | <ul style="list-style-type: none"> <li>DHS</li> <li>2010 &amp; 2015</li> </ul> | n/a                                                                 | Two domains of processes of care: competent care (treatment & assessment), and system competence (timely care) based on women's self-reports<br><br>(1) Assessment & timely care: examined or asked about health before discharge & checked within 1 hour after giving birth.<br><br>(2-3) Treatment: received antibiotics/ORT<br><br>(4) Assessment: had blood taken from heel or finger for testing<br><br><i>Binary: received or not</i> | <ul style="list-style-type: none"> <li>Lancet Global Health Commission on High-Quality Health Systems in the SDG era</li> <li>International guidelines: <ul style="list-style-type: none"> <li>WHO Safe Childbirth Check list</li> <li>Integrated Management of Childhood Illness (IMCI) guidelines</li> </ul> </li> </ul> | <ul style="list-style-type: none"> <li>Composite measure</li> <li>Compared national average change in crude &amp; effective coverage between 2010 &amp; 2015</li> </ul> | Likely overestimate EC because: Quality measures include only a limited no. of recommended items. Dichotomous items (yes/no response) do not measure quality comprehensively. Other relevant indicators, such as appropriate assessment and diagnostic tests, timeliness of care and other preventive and curative treatments for each condition, are not available in the RDHS. Self-reported data; evidence that women's ability to accurately recall care received suggests poor for some indicators. |
| Joseph et al. 2020 (39)   | Childbirth: post-delivery care                                                                                                                                                                          | Malawi  | To use health system and population information to define nutrition quality-adjusted coverage metrics and quantify their impact on breastfeeding and birthweight.                                   | Quality-adjusted coverage: The proportion of deliveries in HF that received nutrition intervention.                          | Likelihood of receipt of interventions based on geographic area and delivery facility type: woman assigned the district average score by facility type based on reported place of care seeking.                                                                                                                                                                  | Women with a live birth in the last 2 yrs                                                                                                                                                                                                                                                                                                   | <ul style="list-style-type: none"> <li>MICS</li> <li>2013-2014</li> </ul>      | <ul style="list-style-type: none"> <li>SPA</li> <li>2013</li> </ul> | Direct observations of 3 interventions received: breastfeeding initiation within 1 hour of delivery, skin-to-skin and rooming in.<br><br><i>Average score across facility: equal weight given to each domain</i>                                                                                                                                                                                                                            | <ul style="list-style-type: none"> <li>None given</li> </ul>                                                                                                                                                                                                                                                               | <ul style="list-style-type: none"> <li>Composite measure</li> </ul>                                                                                                     | Women linked based on reported source of care, so care might not be reflected of true quality experienced. Data sources not perfectly contemporaneous. Births captured up to 2 years before the survey period so predate SPA and quality of care might vary across this time period.                                                                                                                                                                                                                     |



| Reference                     | Intervention/service                | Setting                                                                                                                                                          | Study aim(s)                                                                                                                                                                                                                                                                                                                                     | Indicator                                                                                                                                                                                                                                                                 | Numerator                                                                                                                                                                                                | Denominator                                    | Data source(s)                                                                     |                                                                                    | Quality measure(s)<br>(see Appendix D for individual items)                                                                                                                                                                                                                                                                                                                                                                                                                                                                                                                                                                                           | How quality measures derived                                                                                                                                                                                                                                                                                                                                                                                                                                                                                                                                                                     | Results presented                                                                                                                                                                                                                                                                                                                                                             | Limitations of EC measure reported by author                                                                                                                                         |
|-------------------------------|-------------------------------------|------------------------------------------------------------------------------------------------------------------------------------------------------------------|--------------------------------------------------------------------------------------------------------------------------------------------------------------------------------------------------------------------------------------------------------------------------------------------------------------------------------------------------|---------------------------------------------------------------------------------------------------------------------------------------------------------------------------------------------------------------------------------------------------------------------------|----------------------------------------------------------------------------------------------------------------------------------------------------------------------------------------------------------|------------------------------------------------|------------------------------------------------------------------------------------|------------------------------------------------------------------------------------|-------------------------------------------------------------------------------------------------------------------------------------------------------------------------------------------------------------------------------------------------------------------------------------------------------------------------------------------------------------------------------------------------------------------------------------------------------------------------------------------------------------------------------------------------------------------------------------------------------------------------------------------------------|--------------------------------------------------------------------------------------------------------------------------------------------------------------------------------------------------------------------------------------------------------------------------------------------------------------------------------------------------------------------------------------------------------------------------------------------------------------------------------------------------------------------------------------------------------------------------------------------------|-------------------------------------------------------------------------------------------------------------------------------------------------------------------------------------------------------------------------------------------------------------------------------------------------------------------------------------------------------------------------------|--------------------------------------------------------------------------------------------------------------------------------------------------------------------------------------|
|                               |                                     |                                                                                                                                                                  |                                                                                                                                                                                                                                                                                                                                                  |                                                                                                                                                                                                                                                                           |                                                                                                                                                                                                          |                                                | Household                                                                          | Facility/provider                                                                  |                                                                                                                                                                                                                                                                                                                                                                                                                                                                                                                                                                                                                                                       |                                                                                                                                                                                                                                                                                                                                                                                                                                                                                                                                                                                                  |                                                                                                                                                                                                                                                                                                                                                                               |                                                                                                                                                                                      |
| Kanyangarara et al. 2018 (32) | Childbirth: obstetric service       | 17 LMIC: Bangladesh, Benin, Burkina Faso, DRC, Haiti, Kenya, Malawi, Mauritania, Namibia, Nepal, Rwanda, Senegal, Sierra Leone, Tanzania, Togo, Uganda, Zimbabwe | To assess obstetric service availability, readiness and coverage within and between 17 low- and middle-income countries.                                                                                                                                                                                                                         | Population-level coverage of obstetric services:<br>(1) The proportion of deliveries in HF with EmOC (basic or comprehensive) functionality (service availability)<br><br>(2) The proportion of deliveries in HF ready to provide obstetric services (facility readiness) | Number of deliveries occurring in each stratum (based on health facility type and managing authority), assigned average stratum score for:<br><br>(1) service availability<br><br>(2) facility readiness | Propn of recent live births                    | <ul style="list-style-type: none"> <li>DHS or MICS</li> <li>2007 - 2015</li> </ul> | <ul style="list-style-type: none"> <li>SARA or SPA</li> <li>2007 - 2015</li> </ul> | <p>(1) Service availability: reported performance of 7 basic &amp; 2 comprehensive signal functions</p> <p><i>Categorical: four levels of functionality based on number and type of signal functions performed</i></p> <p>(2) Facility readiness reported/observed availability of 23 items across 4-domains: (i) general requirements, (ii) staff &amp; guidelines, (iii) equipment, (iv) medicines &amp; commodities.</p> <p><i>Binary score: threshold (&gt; 20 items present)</i></p> <p>Estimated indicators of service availability and readiness for each strata of health facility (based on health facility type and managing authority)</p> | <p>Systematic review:</p> <ul style="list-style-type: none"> <li>Gabrysch et al. 2012, New Signal Functions to Measure the Ability of Health Facilities to Provide Routine and Emergency Newborn Care</li> <li>Signal functions were excluded where not collected across all health facility surveys included in the analysis.</li> </ul> <p>Classification of facility functionality based on international guidelines:</p> <ul style="list-style-type: none"> <li>WHO. Monitoring emergency obstetric care: a handbook. WHO: Geneva; 2009</li> <li>WHO's SARA theoretical framework</li> </ul> | <ul style="list-style-type: none"> <li>Composite measure</li> <li>Comparison across countries</li> <li>Service availability &amp; facility readiness adjusted coverage presented separately</li> </ul>                                                                                                                                                                        | Approach assumed that all the women who delivered in a health facility assigned to a specific stratum experienced the "average" service availability and readiness for that stratum. |
| Kemp et al. 2018 (47)         | Childbirth: facility based delivery | Haiti                                                                                                                                                            | To explore facility readiness as a predictor of facility-based delivery in Haiti, controlling for other supply- and demand-side factors. Our challenge was to characterize readiness of delivery-related services, link that readiness to nearby births, and avoid the misclassification errors and strong assumptions made by previous studies. | Facility readiness: the level of delivery-related service readiness available and accessible to women living in each sampling cluster.                                                                                                                                    | HF readiness for each health facility providing delivery services                                                                                                                                        | All births occurring in 2 yrs preceding survey | <ul style="list-style-type: none"> <li>DHS</li> <li>2012</li> </ul>                | <ul style="list-style-type: none"> <li>SPA</li> <li>2013</li> </ul>                | <p>Facility readiness, 52 binary indicators of general service readiness &amp; 18 binary indicators of delivery-specific readiness based on SARA. No further details given</p> <p><i>Average score calculated at cluster level</i></p>                                                                                                                                                                                                                                                                                                                                                                                                                | <p>Based on the WHO's SARA theoretical framework.</p> <ul style="list-style-type: none"> <li>Composite measure</li> </ul>                                                                                                                                                                                                                                                                                                                                                                                                                                                                        | DHS birth data were collected before the SPA facility data; believe SPA offered plausible estimates of the service readiness environment surrounding births given that health facility readiness tends to be stable over a two-year timeframe. Results rely on the completeness, consistency, and validity of the DHS and SPA datasets. SPA used observation of equipment and |                                                                                                                                                                                      |

| Reference                   | Intervention/service                  | Setting                                  | Study aim(s)                                                                                                                                            | Indicator                                                                                                                                                           | Numerator                                                                                  | Denominator                                                                    | Data source(s)                                                                                  |                                                                                                                                                                                                 | Quality measure(s)<br>(see Appendix D<br>for individual<br>items)                                                                                                                                                                                                                                                                                                                                                                                                                                                                                                                   | How quality<br>measures<br>derived                                                                                                               | Results presented                                                                                                                                         | Limitations of EC<br>measure reported<br>by author                                                                                                                                                                                                                                                                                                                                                       |
|-----------------------------|---------------------------------------|------------------------------------------|---------------------------------------------------------------------------------------------------------------------------------------------------------|---------------------------------------------------------------------------------------------------------------------------------------------------------------------|--------------------------------------------------------------------------------------------|--------------------------------------------------------------------------------|-------------------------------------------------------------------------------------------------|-------------------------------------------------------------------------------------------------------------------------------------------------------------------------------------------------|-------------------------------------------------------------------------------------------------------------------------------------------------------------------------------------------------------------------------------------------------------------------------------------------------------------------------------------------------------------------------------------------------------------------------------------------------------------------------------------------------------------------------------------------------------------------------------------|--------------------------------------------------------------------------------------------------------------------------------------------------|-----------------------------------------------------------------------------------------------------------------------------------------------------------|----------------------------------------------------------------------------------------------------------------------------------------------------------------------------------------------------------------------------------------------------------------------------------------------------------------------------------------------------------------------------------------------------------|
|                             |                                       |                                          |                                                                                                                                                         |                                                                                                                                                                     |                                                                                            |                                                                                | Household                                                                                       | Facility/provi<br>der                                                                                                                                                                           |                                                                                                                                                                                                                                                                                                                                                                                                                                                                                                                                                                                     |                                                                                                                                                  |                                                                                                                                                           |                                                                                                                                                                                                                                                                                                                                                                                                          |
|                             |                                       |                                          |                                                                                                                                                         |                                                                                                                                                                     |                                                                                            |                                                                                |                                                                                                 |                                                                                                                                                                                                 |                                                                                                                                                                                                                                                                                                                                                                                                                                                                                                                                                                                     |                                                                                                                                                  |                                                                                                                                                           | services rather than self-reported data, improving the validity of the readiness data. Composite score cannot discriminate between a facility adding latex gloves to its inventory from one acquiring electricity. Further work should test whether the service readiness factors measured by SPA actually align with the areas of quality that most drive demand for facility-based maternity services. |
| Koulidiati et al. 2018 (42) | Sick child care: treatment of illness | 6 low performing regions in Burkina Faso | To estimate crude coverage and effective coverage of U5YO children in Burkina Faso focused on curative care provided by primary-level health facilities | Effective coverage: the propn of all children under 5 in need who actually sought care at a facility categorised as least high or intermediate performance quality. | Children sought care at a facility categorised as high or intermediate performance quality | All children under five that had an illness episode in the previous four weeks | <ul style="list-style-type: none"> <li>Household survey</li> <li>Oct 2013 - Feb 2014</li> </ul> | <ul style="list-style-type: none"> <li>Facility survey for inventory</li> <li>Patient provider observation</li> <li>Vignette-based knowledge assessment</li> <li>Oct 2013 - Feb 2014</li> </ul> | <p>Three dimensions: (1) 9 process indicators based on observations related to performance of management of common childhood diseases and 2 related input indicators; (2) 11 process indicators based on vignettes related to theoretical management of severe childhood diseases and 7 related inputs; (3) general service readiness based on 5 structural indicators.</p> <p><i>Categorical: high/intermediate/low</i></p> <p>Based on facility or service-specific score. Facilities that met different criteria levels for each dimension, were assigned to the lower level</p> | Based on the Donabedian framework & indices developed by Gouws et al. 2005, Measuring the quality of child health care at first-level facilities | <ul style="list-style-type: none"> <li>Composite measure; disaggregated by high performing facilities and both high &amp; intermediate quality</li> </ul> | Quality of care based on content of care and does not capture aspects such as patient adherence to treatment or health outcomes. Assumes every reported illness episode actually requires a medical care visit; might overestimate true need and therefore underestimate coverage.                                                                                                                       |

| Reference               | Intervention/service                                  | Setting                                                                        | Study aim(s)                                                                                                                                                                                                                          | Indicator                                                                                                                                                                                                                                                                                                                                              | Numerator                                                                                                                                                                        | Denominator                                                                                            | Data source(s)                                                                                        |                                                                                                                                                                                                                                                   | Quality measure(s)<br>(see Appendix D for individual items)                                                                                                                                                                                                                                                                                                                                                                                                                                                                                                                                                                                                       | How quality measures derived                                                                                                                                                            | Results presented                                                                                                                                                    | Limitations of EC measure reported by author                                                                                                                                                                                                                                                                                                                                                                                                                                             |
|-------------------------|-------------------------------------------------------|--------------------------------------------------------------------------------|---------------------------------------------------------------------------------------------------------------------------------------------------------------------------------------------------------------------------------------|--------------------------------------------------------------------------------------------------------------------------------------------------------------------------------------------------------------------------------------------------------------------------------------------------------------------------------------------------------|----------------------------------------------------------------------------------------------------------------------------------------------------------------------------------|--------------------------------------------------------------------------------------------------------|-------------------------------------------------------------------------------------------------------|---------------------------------------------------------------------------------------------------------------------------------------------------------------------------------------------------------------------------------------------------|-------------------------------------------------------------------------------------------------------------------------------------------------------------------------------------------------------------------------------------------------------------------------------------------------------------------------------------------------------------------------------------------------------------------------------------------------------------------------------------------------------------------------------------------------------------------------------------------------------------------------------------------------------------------|-----------------------------------------------------------------------------------------------------------------------------------------------------------------------------------------|----------------------------------------------------------------------------------------------------------------------------------------------------------------------|------------------------------------------------------------------------------------------------------------------------------------------------------------------------------------------------------------------------------------------------------------------------------------------------------------------------------------------------------------------------------------------------------------------------------------------------------------------------------------------|
|                         |                                                       |                                                                                |                                                                                                                                                                                                                                       |                                                                                                                                                                                                                                                                                                                                                        |                                                                                                                                                                                  |                                                                                                        | Household                                                                                             | Facility/provider                                                                                                                                                                                                                                 |                                                                                                                                                                                                                                                                                                                                                                                                                                                                                                                                                                                                                                                                   |                                                                                                                                                                                         |                                                                                                                                                                      |                                                                                                                                                                                                                                                                                                                                                                                                                                                                                          |
| Larson et al. 2017 (53) | Childbirth: obstetric care                            | PHCs in 1 rural region in Tanzania                                             | Linked population and facility data to assess the effective coverage of obstetric care for women in rural Tanzania, explore the bottlenecks in effective coverage and estimate wealth-based differences in receipt of effective care. | Effective coverage: the proportion of women who delivered in facilities providing good care on successive dimensions of quality, beginning with basic infrastructure, followed by equipment and supplies, health worker knowledge and competence, provision of routine obstetric services and ending with provision of basic emergency obstetric care. | Women delivering at a facility receiving at least the minimum threshold of quality                                                                                               | All women ≥15 years who delivered a child in yr preceding interview.                                   | <ul style="list-style-type: none"> <li>Household interviews</li> <li>Jan 2016 – April 2016</li> </ul> | <ul style="list-style-type: none"> <li>Facility audits</li> <li>Jan 2016 – Feb 2016 (extracted data from facility register Jan-Dec 2015)</li> <li>Health worker interviews (incl. 2 clinical vignettes)</li> <li>Jan 2016 – April 2016</li> </ul> | <p>5 dimensions: (1) facility infrastructure; (2) availability of equipment, supplies &amp; medicines; (3) HCW knowledge &amp; competence (tested); (4) provision of routine obstetric services recorded in facility register; (5) provision of emergency obstetric and newborn services (BEmONC).</p> <p><i>Categorical: High/minimum/less than minimum</i><br/>Calculated the mean HCW knowledge score &amp; mean input score for other 4 dimensions<br/>High threshold = ≥90% of tracer indicators were complete or for the knowledge and skill dimension if the average health worker score was 80%<br/>Minimum threshold = 50% completion of indicators.</p> | Tracer indicators for equipment, supplies and medications were determined from the Tanzanian Ministry of Health required list, previously reported indices, and an expert review panel. | <ul style="list-style-type: none"> <li>Quality cascade, 5 steps: infrastructure, equipment, HCW knowledge, provision of routine care, provision BEmONC</li> </ul>    | Thresholds for minimum quality have not been empirically defined, requiring somewhat subjective judgment of what constitutes adequate care. Threshold selected for minimum quality (50% completion) was permissive and thus represents the best-case scenario. Indicators for routine services were limited to those recorded in the facility registers. Conducted from facility-level data and may not reflect the actual experiences of each individual woman on the day of her visit. |
| Leslie et al. 2017 (33) | Sick child care: treatment of diarrhoea, fever or ARI | 8 countries: Haiti, Kenya, Malawi, Namibia, Senegal, Rwanda, Tanzania & Uganda | To combine nationally representative facility and population survey data from eight countries to evaluate effective coverage of three primary care services at the subnational level.                                                 | Effective coverage: multiplied use of healthcare by average quality                                                                                                                                                                                                                                                                                    | Number of children under-5 who sought care from a formal provider. Each sick child was assigned the structural quality score for the reported category of source of care sought. | Children under 5 who had experienced diarrhoea, fever or acute respiratory illness in the prior 2 wks. | <ul style="list-style-type: none"> <li>DHS or MICS</li> <li>2014 or 2015-2016</li> </ul>              | <ul style="list-style-type: none"> <li>SPA</li> <li>Uganda, Rwanda 2007;</li> <li>Namibia 2009;</li> <li>Kenya 2010;</li> <li>Haiti, Malawi 2013;</li> <li>Senegal 2013-14;</li> <li>Tanzania 2015</li> </ul>                                     | <p>Technical quality based on observations of essential clinical actions. 4 domains: history taking, routine examination, drug administration &amp; immunization, and client education &amp; counselling</p> <p><i>Average score</i><br/>Calculated as the percent of actions completed out of items assessed per country.</p>                                                                                                                                                                                                                                                                                                                                    | International guidelines: <ul style="list-style-type: none"> <li>WHO. Integrated Management of Childhood Illness: Chart Booklet. Geneva, Switzerland: WHO, 2014</li> </ul>              | <ul style="list-style-type: none"> <li>Composite measure</li> <li>EC calculated at sub-national and national level; compare between and within countries.</li> </ul> | Data sources spanned 2007-2016, limiting contemporaneous cross-country comparisons. Facility-based estimates of healthcare quality may not fully reflect use patterns.                                                                                                                                                                                                                                                                                                                   |

| Reference                 | Intervention/service                                                                                                                                                              | Setting                | Study aim(s)                                                                                                                                                                                                                                                                                         | Indicator                                                                                                                                                                                                                | Numerator                                                                                                                                                                                       | Denominator                                                                                                                                                                                                                                                                                                                                                                                                                                                                                   | Data source(s)                                                                                                         |                                                                                                                                   | Quality measure(s)<br>(see Appendix D for individual items)                                                                                                                                                                                                                                                                                                                                                                                                                                                                                                                                                                                                                   | How quality measures derived          | Results presented                                                                                                                                         | Limitations of EC measure reported by author                                                                              |
|---------------------------|-----------------------------------------------------------------------------------------------------------------------------------------------------------------------------------|------------------------|------------------------------------------------------------------------------------------------------------------------------------------------------------------------------------------------------------------------------------------------------------------------------------------------------|--------------------------------------------------------------------------------------------------------------------------------------------------------------------------------------------------------------------------|-------------------------------------------------------------------------------------------------------------------------------------------------------------------------------------------------|-----------------------------------------------------------------------------------------------------------------------------------------------------------------------------------------------------------------------------------------------------------------------------------------------------------------------------------------------------------------------------------------------------------------------------------------------------------------------------------------------|------------------------------------------------------------------------------------------------------------------------|-----------------------------------------------------------------------------------------------------------------------------------|-------------------------------------------------------------------------------------------------------------------------------------------------------------------------------------------------------------------------------------------------------------------------------------------------------------------------------------------------------------------------------------------------------------------------------------------------------------------------------------------------------------------------------------------------------------------------------------------------------------------------------------------------------------------------------|---------------------------------------|-----------------------------------------------------------------------------------------------------------------------------------------------------------|---------------------------------------------------------------------------------------------------------------------------|
|                           |                                                                                                                                                                                   |                        |                                                                                                                                                                                                                                                                                                      |                                                                                                                                                                                                                          |                                                                                                                                                                                                 |                                                                                                                                                                                                                                                                                                                                                                                                                                                                                               | Household                                                                                                              | Facility/provider                                                                                                                 |                                                                                                                                                                                                                                                                                                                                                                                                                                                                                                                                                                                                                                                                               |                                       |                                                                                                                                                           |                                                                                                                           |
| Leslie et al. 2019 (37)   | (1) Childbirth: delivery care<br><br>(2) Childbirth: newborn care<br><br>(3) sick child care: treatment of diarrhoea<br><br>(4) sick child care: treatment of respiratory illness | Mexico                 | To estimate effective coverage and its regional inequalities within IMSS based on routine health information and to identify the challenges in generating comprehensive estimates of health system performance.                                                                                      | Effective coverage: the number of individuals experiencing high-quality outcomes divided by the number in need of the service.                                                                                           | Number of individuals receiving care from an IMSS facility and experienced a positive health outcome                                                                                            | Population in of individuals with the symptom or condition requiring health service in strata by state and age group:<br><br>(1) delivery: Women with live birth in last year<br><br>(2) newborn: born alive in last year<br><br>(3) diarrhoea: parental report of child under 5 experiencing at least 3 days of diarrhoea or diarrhoea plus fever<br><br>(4) respiratory illness: child under 5 experiencing flu, cough, bronchitis, sore throat or pain in his/her ears in the past 2 weeks | <ul style="list-style-type: none"> <li>Mexican National Health and Nutrition Survey (ENSANUT)</li> <li>2012</li> </ul> | <ul style="list-style-type: none"> <li>IMSS Performance Indicators; based on health information systems.</li> <li>2016</li> </ul> | Health outcome:<br><br>(1) delivery: without complication or death (subtracting maternal complications and mortality from total cases).<br><br>(2) newborn: live births reaching 28 days without death due to respiratory infection, nosocomial infection or sepsis<br><br>(3) diarrhoea: visits that did not result in hospitalisation due to diarrhoea<br><br>(4) respiratory illness: visits that did not result in hospitalization due to non chronic respiratory condition<br><br>As outcome not entirely amenable to health services and hence will occur even in the presence of a high-quality health system, rescaled effective coverage against a global benchmark. | None given                            | <ul style="list-style-type: none"> <li>Cascade, 3 steps: in need of services, using service, and experiencing high-quality outcomes</li> </ul>            | Assessment of quality using neonatal mortality without consideration of avoidable morbidity likely overestimated quality. |
| Leyvraz et al. 2016a (61) | Nutrition: Fortified Complementary Foods                                                                                                                                          | Abidjan, Cote d'Ivoire | To determine the coverage of the Project de Promotion de l'Alimentation de Complément Enrichie du Jeune Enfant en Côte d'Ivoire (PACE) program among children 6–23 months of age living in Abidjan, identify the major barriers to coverage of the program, and formulate recommendations for future | Effective coverage: the proportion of children aged 6-23 months whose caregiver has fed the participating child the project-specific fortified complementary food (Farinor or Nutribon) at least once in the past 7 days | The number of children whose caregiver had heard of the project-specific fortified complementary food (Farinor or Nutribon) and had fed the child the product at least once in the last 7 days. | Number of children aged 0 to 23 mnths<br><br>(1) All children<br>(2) Children from poor households and with poor feeding practices                                                                                                                                                                                                                                                                                                                                                            | <ul style="list-style-type: none"> <li>Household survey</li> <li>September-October 2014</li> </ul>                     | n/a                                                                                                                               | Receipt and timing of supplement based on caregiver's report<br><br><i>Binary: taken as prescribed vs. not</i>                                                                                                                                                                                                                                                                                                                                                                                                                                                                                                                                                                | None given, adapted Tanahashi's model | <ul style="list-style-type: none"> <li>Coverage levels, 4 steps: message coverage, contact coverage, partial coverage &amp; effective coverage</li> </ul> | None given                                                                                                                |

| Reference                 | Intervention/service                     | Setting                                   | Study aim(s)                                                                                                                                                                                                                                                                                                                                            | Indicator                                                                                                                                     | Numerator                                                                                                                                            | Denominator                                                                                                       | Data source(s)                                                                                     |                       | Quality measure(s)<br>(see Appendix D<br>for individual<br>items)                                              | How quality<br>measures<br>derived    | Results presented                                                                                                                                                         | Limitations of EC<br>measure reported<br>by author                                                                                                                                                                                           |
|---------------------------|------------------------------------------|-------------------------------------------|---------------------------------------------------------------------------------------------------------------------------------------------------------------------------------------------------------------------------------------------------------------------------------------------------------------------------------------------------------|-----------------------------------------------------------------------------------------------------------------------------------------------|------------------------------------------------------------------------------------------------------------------------------------------------------|-------------------------------------------------------------------------------------------------------------------|----------------------------------------------------------------------------------------------------|-----------------------|----------------------------------------------------------------------------------------------------------------|---------------------------------------|---------------------------------------------------------------------------------------------------------------------------------------------------------------------------|----------------------------------------------------------------------------------------------------------------------------------------------------------------------------------------------------------------------------------------------|
|                           |                                          |                                           |                                                                                                                                                                                                                                                                                                                                                         |                                                                                                                                               |                                                                                                                                                      |                                                                                                                   | Household                                                                                          | Facility/provi<br>der |                                                                                                                |                                       |                                                                                                                                                                           |                                                                                                                                                                                                                                              |
|                           |                                          |                                           | program activities.                                                                                                                                                                                                                                                                                                                                     |                                                                                                                                               |                                                                                                                                                      |                                                                                                                   |                                                                                                    |                       |                                                                                                                |                                       |                                                                                                                                                                           |                                                                                                                                                                                                                                              |
| Leyvraz et al. 2016b (62) | Nutrition: Fortified Complementary Foods | Telangana State, India                    | To determine the coverage of the fortified complementary food program managed by Andhra Pradesh Foods (AP Foods), a state government-owned food manufacturing company among children 6–35 months of age living in Telangana state, identify the major barriers to coverage of the program, and formulate recommendations for future program activities. | Effective coverage: the proportion of children that always consume the project-specific fortified complementary food (Bal Amrutham)           | The number of children whose caregiver received the project-specific fortified complementary food (Bal Amrutham) and who always consumed the ration. | Number of children aged 0 to 35 mnths<br><br>(1) All children at risk of poverty and with poor feeding practices. | <ul style="list-style-type: none"> <li>Household survey</li> <li>November-December 2014</li> </ul> | n/a                   | Receipt and timing of supplement based on caregiver's report<br><br><i>Binary: taken as prescribed vs. not</i> | None given, adapted Tanahashi's model | <ul style="list-style-type: none"> <li>Coverage and utilisation levels, 4 steps: message coverage, contact coverage, partial coverage &amp; effective coverage</li> </ul> | None given                                                                                                                                                                                                                                   |
| Leyvraz et al. 2018 (60)  | Nutrition: Micronutrient powders         | 7 neighbourhoods of Nairobi County, Kenya | To determine the baseline MNP coverage and utilization mainly from existing free distribution through the government (i.e., to determine the coverage of the existing MNP program in the area), especially among subgroups that may be more vulnerable to inadequate nutrient intake as a result of poverty or poor IYCF practices.                     | Effective coverage: The proportion of children aged 6-23 months that consumed at least 3 sachets of the micronutrient powder in the last week | The number of children whose caregivers had ever heard of MNP and consumed at least 3 sachets of the MNP in the last week                            | Number of children aged 6 to 23 mnths<br><br>(1) All children at risk of poverty or poor feeding practices        | <ul style="list-style-type: none"> <li>Household survey</li> <li>date n/r</li> </ul>               | n/a                   | Receipt and timing of supplement based on caregiver's report<br><br><i>Binary: taken as prescribed vs. not</i> | None given, adapted Tanahashi's model | <ul style="list-style-type: none"> <li>Coverage processes, 4 steps: message coverage, contact coverage, partial coverage &amp; effective coverage</li> </ul>              | The main limitation of this study was that the results were not representative of the country, or of all Nairobi. The neighbourhoods included in the survey were selected based on their inclusion in the project area of a new MNP program. |

| Reference                 | Intervention/service                                                                                                             | Setting                                                     | Study aim(s)                                                                                                                                                                                                                                                                                       | Indicator                                                                                                                                                                                                                                                                                                                                                                                                                          | Numerator                                                                           | Denominator                                                                                                       | Data source(s)                                                                                       |                                                                                                                                                                                    | Quality measure(s)<br>(see Appendix D for individual items)                                                                                                                                                                                                         | How quality measures derived                                                                                                                                                                                                                                                                                                                                                                                                                               | Results presented                                                                                                                                            | Limitations of EC measure reported by author                                                                                                                                                                                                                                                  |
|---------------------------|----------------------------------------------------------------------------------------------------------------------------------|-------------------------------------------------------------|----------------------------------------------------------------------------------------------------------------------------------------------------------------------------------------------------------------------------------------------------------------------------------------------------|------------------------------------------------------------------------------------------------------------------------------------------------------------------------------------------------------------------------------------------------------------------------------------------------------------------------------------------------------------------------------------------------------------------------------------|-------------------------------------------------------------------------------------|-------------------------------------------------------------------------------------------------------------------|------------------------------------------------------------------------------------------------------|------------------------------------------------------------------------------------------------------------------------------------------------------------------------------------|---------------------------------------------------------------------------------------------------------------------------------------------------------------------------------------------------------------------------------------------------------------------|------------------------------------------------------------------------------------------------------------------------------------------------------------------------------------------------------------------------------------------------------------------------------------------------------------------------------------------------------------------------------------------------------------------------------------------------------------|--------------------------------------------------------------------------------------------------------------------------------------------------------------|-----------------------------------------------------------------------------------------------------------------------------------------------------------------------------------------------------------------------------------------------------------------------------------------------|
|                           |                                                                                                                                  |                                                             |                                                                                                                                                                                                                                                                                                    |                                                                                                                                                                                                                                                                                                                                                                                                                                    |                                                                                     |                                                                                                                   | Household                                                                                            | Facility/provider                                                                                                                                                                  |                                                                                                                                                                                                                                                                     |                                                                                                                                                                                                                                                                                                                                                                                                                                                            |                                                                                                                                                              |                                                                                                                                                                                                                                                                                               |
| Marchant et al. 2015 (34) | (1) Childbirth: Prevention of haemorrhage<br><br>(2) Postpartum check within 48 hours<br><br>(3) Postnatal check within 48 hours | 4 regions in Ethiopia, 1 state in India, 1 state in Nigeria | To propose a measurement method for evaluating the quality of health care for mothers and newborns that links the coverage of each type of contact to the content of care that should take place during those contacts to estimate the coverage of high quality contacts at the population level.  | High quality contacts:<br>(1) The percent of women who were attended at birth by a skilled birth attendant and received AMTSL<br><br>(2) The percent of women who had a post-partum check within 48 hours of birth and for whom all five post-partum processes were met - exclude this?<br><br>(3) The percent of newborns who had a post-natal check within 48 hours of birth and for whom all five post-natal processes were met | Contacts during which recommended set of processes for routine health care were met | (1-2) women aged 13-49 with a live birth in previous 12 mnths<br><br>(3) newborns born alive in previous 12 mnths | <ul style="list-style-type: none"> <li>Household survey</li> <li>2012</li> </ul>                     | <ul style="list-style-type: none"> <li>Facility survey</li> <li>Frontline worker survey: HCW who carried out last delivery recorded in maternity register</li> <li>2012</li> </ul> | <p>Routine process of care based on HCW reports</p> <p>(1) Attended at birth by a skilled birth attendant and HCW reported received AMTSL.</p> <p>(2) Five post-partum processes</p> <p>(3) Five post-natal processes</p> <p><i>Binary: all present vs. not</i></p> | <p>International guidelines:</p> <ul style="list-style-type: none"> <li>Partnership for Maternal Newborn &amp; Child Health and the Aga Khan University. Essential Interventions, Commodities and Guidelines for Reproductive, Maternal, Newborn and Child Health. A Global Review of the Key Interventions Related to Reproductive, Maternal Newborn and Child Health (RMNCH). 2011.</li> </ul>                                                           | <ul style="list-style-type: none"> <li>Composite score</li> <li>EC measure presented at country or state level</li> </ul>                                    | SBA responses about their own behaviour at the last birth they attended. Birth attendants may be biased towards providing positive responses about their own behaviours, meaning that the method provides a 'most optimistic' estimate of coverage that can be applied in a standardised way. |
| Millar et al. 2014 (50)   | Sick child care: Malaria                                                                                                         | Bauchi and Sokoto States, Nigeria                           | To describe the current care-seeking and treatment pattern for children under five with fever in Northern Nigeria. Determine how many children with fever received treatment consistent with NNCP/WHO standards and which factors predict if a child under five with fever is taking to treatment. | Treatment pathway: Children under the age of five who sought prompt treatment at a provider and received it according to Nigeria National Malaria Control Program (NMCP)/WHO standards                                                                                                                                                                                                                                             | Number of children who received ACT                                                 | Number of children aged 0-59 months that had malaria symptoms                                                     | <ul style="list-style-type: none"> <li>Household survey</li> <li>November - December 2012</li> </ul> | n/a                                                                                                                                                                                | <p>Receipt and timeliness of treatment based on caregiver's report</p> <p><i>Binary: all components or not</i></p>                                                                                                                                                  | <p>Prompt treatment based on recommendations from the RBM Partnership:</p> <ul style="list-style-type: none"> <li>RBM: Progress &amp; Impact Series: Country Reports: Focus on Nigeria. Geneva: Roll Back Malaria Partnership; 2012.</li> </ul> <p>Standard case management pathway based on international guidelines:</p> <ul style="list-style-type: none"> <li>WHO: Guidelines for the Treatment of Malaria. 2nd edition. Geneva: WHO; 2010.</li> </ul> | <ul style="list-style-type: none"> <li>Treatment pathway, 4 steps: malaria symptoms, sought prompt treatment, received a blood test, received ACT</li> </ul> | Relies on women's self-reports; including for blood test results.                                                                                                                                                                                                                             |

| Reference                                     | Intervention/service                   | Setting                                                                                                             | Study aim(s)                                                                                                                                                                                                                                                                                                                                                              | Indicator                                                                                                                                                                                                                                                                                                                                                                                                            | Numerator                                                                                                                                                                                                                                                                                                                                                                                                                                                                                                                                                                                                                   | Denominator                                                     | Data source(s)                                                                                                                          |                                                                                          | Quality measure(s)<br>(see Appendix D for individual items)                                                                                                                                                                                                       | How quality measures derived                                                                                                       | Results presented                                                                                                                                                                                                                                                                             | Limitations of EC measure reported by author                                                                                                                                                           |
|-----------------------------------------------|----------------------------------------|---------------------------------------------------------------------------------------------------------------------|---------------------------------------------------------------------------------------------------------------------------------------------------------------------------------------------------------------------------------------------------------------------------------------------------------------------------------------------------------------------------|----------------------------------------------------------------------------------------------------------------------------------------------------------------------------------------------------------------------------------------------------------------------------------------------------------------------------------------------------------------------------------------------------------------------|-----------------------------------------------------------------------------------------------------------------------------------------------------------------------------------------------------------------------------------------------------------------------------------------------------------------------------------------------------------------------------------------------------------------------------------------------------------------------------------------------------------------------------------------------------------------------------------------------------------------------------|-----------------------------------------------------------------|-----------------------------------------------------------------------------------------------------------------------------------------|------------------------------------------------------------------------------------------|-------------------------------------------------------------------------------------------------------------------------------------------------------------------------------------------------------------------------------------------------------------------|------------------------------------------------------------------------------------------------------------------------------------|-----------------------------------------------------------------------------------------------------------------------------------------------------------------------------------------------------------------------------------------------------------------------------------------------|--------------------------------------------------------------------------------------------------------------------------------------------------------------------------------------------------------|
|                                               |                                        |                                                                                                                     |                                                                                                                                                                                                                                                                                                                                                                           |                                                                                                                                                                                                                                                                                                                                                                                                                      |                                                                                                                                                                                                                                                                                                                                                                                                                                                                                                                                                                                                                             |                                                                 | Household                                                                                                                               | Facility/provider                                                                        |                                                                                                                                                                                                                                                                   |                                                                                                                                    |                                                                                                                                                                                                                                                                                               |                                                                                                                                                                                                        |
| Mmanga et al. 2021 (59)                       | Vaccination: Full vaccination coverage | Malawi                                                                                                              | To describe the trend in immunization coverage, dropout rates and effective immunization coverages (FVC) among children aged 12–23 months in Malawi.                                                                                                                                                                                                                      | Effective Immunization Coverage: proportion of children aged 12–23 months who received the recommended EPI vaccine antigens                                                                                                                                                                                                                                                                                          | Number of children fully vaccinated by 12–23 months according to the vaccination calendar timeline                                                                                                                                                                                                                                                                                                                                                                                                                                                                                                                          | Number of children under 12 years eligible for full vaccination | <ul style="list-style-type: none"> <li>DHS</li> <li>2004, 2010, 2015-16</li> </ul>                                                      | n/a                                                                                      | Children aged 12–23 months who received BCG, OPV3, Penta3, PCV3, Rota2 and MCV1 vaccines<br><br><i>Binary: received or not</i>                                                                                                                                    | Malawi Expanded Programme on Immunization (EPI) schedule                                                                           | <ul style="list-style-type: none"> <li>Bottleneck analysis framework, 4 steps: initial utilization (received either BCG or Penta1), continuous utilization (received Penta 3), adequate coverage (received MR1), full vaccination coverage (BCG, OPV3, Penta3, PCV3, RV2 and MCV1)</li> </ul> | DHS does not have data on supply determinants of services (commodities, human resources and geographic access) so only able to focus on demand and quality determinants of services.                   |
| Mokdad et al. 2015 (35)<br>*Salud Mesoamérica | Vaccination: MMR                       | Poorest quintile of the population in 6 countries: El Salvador, Guatemala, Honduras, Mexico, Nicaragua, and Panama. | To assess the presence of missed opportunities to vaccinate using a large household survey in Mesoamerica. To estimate the potential increase in immunization coverage and reduction in days at risk if every opportunity to vaccinate a child was used, they analysed vaccination histories of children 11–59 months of age from large household surveys in Mesoamerica. | <p>Missed opportunity:</p> <p>(1) Timely MMR coverage according to card only considering timeliness</p> <p>(2) MMR coverage among children attending facilities with MMR in stock on day of survey</p> <p>(3) MMR coverage among children attending facilities with MMR stock-out in 3 months prior to the survey</p> <p>(4) MMR coverage among children attending facilities with ORS in stock on day of survey</p> | <p>(1) Children aged 13 months or older with a MMR vaccine given between 11.5 and 13.5 months</p> <p>(2) Children with required number of doses for age with proper time interval and not before eligibility window for MMR coverage attending facilities with MMR in stock on day of health facility survey</p> <p>(3) Children with required number of doses for age with proper time interval and not before eligibility window for MMR out of stock in three months prior to health facility survey;</p> <p>(4) Children with required number of doses for age with proper time interval and not before eligibility</p> | Number of children aged 11-59 months with a vaccine card        | <ul style="list-style-type: none"> <li>Household survey, incl. review of vaccination card</li> <li>March 2011 - August 2013.</li> </ul> | <ul style="list-style-type: none"> <li>SM2015 baseline health facility survey</li> </ul> | <p>(1) Timely vaccination as recorded on card: vaccine administered between 11 and 13 months</p> <p><i>Binary: timely or not</i></p> <p>(2-4) Facility readiness: Availability of MMR vaccine and oral rehydration salts</p> <p><i>Binary: present or not</i></p> | National guidelines: MMR vaccination required at 12 months in all countries in Mesoamerica<br>No details given on other components | <ul style="list-style-type: none"> <li>(1) Coverage cascade, 3 steps: owning a health card, vaccine coverage and timeliness</li> <li>(2, 3 &amp; 4) Composite score</li> </ul>                                                                                                                | Calculated missed opportunities using vaccination visits only as data on other health care visits not available. Using all visits as possibilities for vaccination would result in increased coverage. |

| Reference                 | Intervention/service                                                                                                                                                                                                                                        | Setting                            | Study aim(s)                                                                                                                                                                                                                              | Indicator                                                                                                                                                                                                                                                                                                | Numerator                                                                                                                         | Denominator                                                                                                                                                                                                                 | Data source(s)                                                                                                                                         |                                                                                                                                                                                                                                                                                                             | Quality measure(s)<br>(see Appendix D<br>for individual<br>items)                                                                                                                                                                                                                                                                                                                                                                                                                                                                                                                                                                                            | How quality<br>measures<br>derived                                                                                                                                                                                                                                                                                                                                                                                                                                                                                                                                                                                                            | Results presented                                                                                                                                                                     | Limitations of EC<br>measure reported<br>by author                                                                                                                                                                         |
|---------------------------|-------------------------------------------------------------------------------------------------------------------------------------------------------------------------------------------------------------------------------------------------------------|------------------------------------|-------------------------------------------------------------------------------------------------------------------------------------------------------------------------------------------------------------------------------------------|----------------------------------------------------------------------------------------------------------------------------------------------------------------------------------------------------------------------------------------------------------------------------------------------------------|-----------------------------------------------------------------------------------------------------------------------------------|-----------------------------------------------------------------------------------------------------------------------------------------------------------------------------------------------------------------------------|--------------------------------------------------------------------------------------------------------------------------------------------------------|-------------------------------------------------------------------------------------------------------------------------------------------------------------------------------------------------------------------------------------------------------------------------------------------------------------|--------------------------------------------------------------------------------------------------------------------------------------------------------------------------------------------------------------------------------------------------------------------------------------------------------------------------------------------------------------------------------------------------------------------------------------------------------------------------------------------------------------------------------------------------------------------------------------------------------------------------------------------------------------|-----------------------------------------------------------------------------------------------------------------------------------------------------------------------------------------------------------------------------------------------------------------------------------------------------------------------------------------------------------------------------------------------------------------------------------------------------------------------------------------------------------------------------------------------------------------------------------------------------------------------------------------------|---------------------------------------------------------------------------------------------------------------------------------------------------------------------------------------|----------------------------------------------------------------------------------------------------------------------------------------------------------------------------------------------------------------------------|
|                           |                                                                                                                                                                                                                                                             |                                    |                                                                                                                                                                                                                                           |                                                                                                                                                                                                                                                                                                          |                                                                                                                                   |                                                                                                                                                                                                                             | Household                                                                                                                                              | Facility/provi<br>der                                                                                                                                                                                                                                                                                       |                                                                                                                                                                                                                                                                                                                                                                                                                                                                                                                                                                                                                                                              |                                                                                                                                                                                                                                                                                                                                                                                                                                                                                                                                                                                                                                               |                                                                                                                                                                                       |                                                                                                                                                                                                                            |
|                           |                                                                                                                                                                                                                                                             |                                    |                                                                                                                                                                                                                                           |                                                                                                                                                                                                                                                                                                          | window for<br>MMR<br>coverage<br>attending<br>facilities with<br>ORS in stock<br>on day of<br>survey                              |                                                                                                                                                                                                                             |                                                                                                                                                        |                                                                                                                                                                                                                                                                                                             |                                                                                                                                                                                                                                                                                                                                                                                                                                                                                                                                                                                                                                                              |                                                                                                                                                                                                                                                                                                                                                                                                                                                                                                                                                                                                                                               |                                                                                                                                                                                       |                                                                                                                                                                                                                            |
| Munos et al.<br>2018 (43) | (1) Childbirth:<br>Labour & delivery<br><br>(2) Childbirth:<br>immediate newborn<br>care<br><br>(3) post-discharge<br>postnatal care for<br>mother and baby<br>within 2 days of birth<br><br>(4) sick child care:<br>treatment fever,<br>cough or diarrhoea | Savanes region<br>of Côte d'Ivoire | To better<br>understand the<br>feasibility and<br>comparability of<br>exact-match and<br>different<br>ecological<br>methods for<br>linking household<br>and health<br>provider surveys<br>to obtain<br>effective<br>coverage<br>measures. | (1) Structure-<br>adjusted<br>coverage:<br>proportion of<br>women or<br>children visiting<br>a facility that is<br>ready to<br>provide care<br><br>(2) Process-<br>adjusted<br>coverage:<br>proportion of<br>women or<br>children visiting<br>a facility that<br>provides actual<br>processes of<br>care | Average<br>structural or<br>process<br>quality scores<br>for the<br>provider<br>category<br>reported as<br>the source of<br>care. | (1-3) Women<br>reported a live<br>birth in the 2 yrs<br>preceding the<br>survey<br><br>(4) Mothers of<br>children under-5<br>years who<br>reported child<br>had fever, cough<br>or diarrhoea in 2<br>weeks before<br>survey | <ul style="list-style-type: none"> <li>MICS; 6 Qs<br/>added to<br/>identify<br/>exact<br/>sources of<br/>care.</li> <li>May – July<br/>2016</li> </ul> | <ul style="list-style-type: none"> <li>Facility<br/>inventory<br/>adapted<br/>from SPA &amp;<br/>SARA.</li> <li>Caseload<br/>from facility<br/>registers.</li> <li>HCW<br/>survey</li> <li>Observatio<br/>ns of<br/>postnatal<br/>and sick<br/>child<br/>consultation</li> <li>May-June<br/>2016</li> </ul> | <p>Three domains of<br/>structural quality: (1)<br/>service availability;<br/>(2) availability of<br/>drugs, diagnostics &amp;<br/>commodities; (3)<br/>training, supervision<br/>&amp; availability of<br/>guidelines.</p> <p>Process quality<br/>based on observed<br/>processes of care,<br/>including the<br/>patient's activities,<br/>the provider's<br/>activities, and the<br/>interactions between<br/>the two.</p> <p><i>Average score</i><br/>Number of items<br/>present divided by<br/>total number of<br/>items. Score ranged<br/>from 0 to 1.<br/>Training variable:<br/>proportion of HCW<br/>at facility who had<br/>received training.</p> | <p>Used Donabedian<br/>definitions of<br/>structural quality<br/>and process<br/>quality.<br/>SARA analysis<br/>guide for<br/>structural quality.<br/>Process quality<br/>used international<br/>guidelines:</p> <ul style="list-style-type: none"> <li>WHO Safe<br/>Childbirth<br/>Checklist.</li> <li>WHO<br/>Recommendati<br/>ons on<br/>Postnatal Care<br/>of the Mother<br/>and Newborn.<br/>WHO<br/>Guidelines<br/>Approved by<br/>the Guidelines<br/>Review<br/>Committee.<br/>Geneva: WHO;<br/>2013</li> <li>WHO.<br/>Integrated<br/>Management<br/>of Childhood<br/>Illness. Chart<br/>Booklet.<br/>Geneva: WHO;<br/>2014</li> </ul> | <ul style="list-style-type: none"> <li>Composite measure<br/>adjusted coverage<br/>presented separately</li> <li>EC estimates presented by<br/>different linking approach.</li> </ul> | Relies on women<br>reporting the source<br>of care visited;<br>although errors<br>likely to be rare.<br>Assumes no error in<br>our measurement of<br>facility quality<br>because collected<br>data from all<br>facilities. |



| Reference                                          | Intervention/service                               | Setting                           | Study aim(s)                                                                                                                                                                                | Indicator                                                                                                | Numerator                                                                      | Denominator                                                                                                                                                                                                                  | Data source(s)                                                                                                                                                                                                                                                                                                                 |                                                                                       | Quality measure(s)<br>(see Appendix D for individual items)                                                                                                                                                                                                                                                                                                                                                                                                                                                                                                                                                                                                                                                                                                                        | How quality measures derived                                                                                                                                                           | Results presented                                                                                                                                                                                                  | Limitations of EC measure reported by author                                                                                                                                                                                                                                                                                                         |
|----------------------------------------------------|----------------------------------------------------|-----------------------------------|---------------------------------------------------------------------------------------------------------------------------------------------------------------------------------------------|----------------------------------------------------------------------------------------------------------|--------------------------------------------------------------------------------|------------------------------------------------------------------------------------------------------------------------------------------------------------------------------------------------------------------------------|--------------------------------------------------------------------------------------------------------------------------------------------------------------------------------------------------------------------------------------------------------------------------------------------------------------------------------|---------------------------------------------------------------------------------------|------------------------------------------------------------------------------------------------------------------------------------------------------------------------------------------------------------------------------------------------------------------------------------------------------------------------------------------------------------------------------------------------------------------------------------------------------------------------------------------------------------------------------------------------------------------------------------------------------------------------------------------------------------------------------------------------------------------------------------------------------------------------------------|----------------------------------------------------------------------------------------------------------------------------------------------------------------------------------------|--------------------------------------------------------------------------------------------------------------------------------------------------------------------------------------------------------------------|------------------------------------------------------------------------------------------------------------------------------------------------------------------------------------------------------------------------------------------------------------------------------------------------------------------------------------------------------|
|                                                    |                                                    |                                   |                                                                                                                                                                                             |                                                                                                          |                                                                                |                                                                                                                                                                                                                              | Household                                                                                                                                                                                                                                                                                                                      | Facility/provider                                                                     |                                                                                                                                                                                                                                                                                                                                                                                                                                                                                                                                                                                                                                                                                                                                                                                    |                                                                                                                                                                                        |                                                                                                                                                                                                                    |                                                                                                                                                                                                                                                                                                                                                      |
| Murphy et al. 2018 (38)<br>* Nairobi Newborn Study | Inpatient neonatal care                            | Nairobi City County, Kenya        | To report on the quality of the process of care delivered to small and sick inpatient newborns across diverse facility settings in Nairobi with a view to understanding effective coverage. | Effective coverage: Proportion of newborns needing care attending a facility providing high-quality care | Number of neonates attending a facility providing high quality care            | Number of newborns requiring care; estimated by applying the rate of live births requiring inpatient services (183 per 1000 live births) to the total number of live births in the study region between mid-2014 to mid-2015 | None:<br>• Estimated number of live births in Nairobi City County in 2017 by applying the Nairobi City County crude birth rate obtained from the Kenyan 2014 demographic and health survey to population estimates for the County, derived from the 2009 national census and adjusted for population growth from 2009 to 2017. | • Facility assessment<br>• Neonatal medical records review<br>• July 2014 - June 2015 | Process quality based on medical records across 6 domains: (i) documentation of newborn characteristics, (ii) documentation of signs and symptoms, (iii) evidence of monitoring, (iv) correct antibiotic dose, (v) correct oxygen treatment and (vi) correct fluids and feeds prescribed.<br><br>Structural quality across 8 domains: (i) infrastructure, (ii) laboratory services, (iii) hygiene equipment, (iv) safe delivery equipment and drugs for mothers, (v) resuscitation equipment for newborns on the delivery ward, (vi) essential equipment in the newborn unit (NBU), (vii) intravenous fluids and feeds in the NBU and (viii) NBU drugs.<br><br><i>Categorical: high/medium/low</i><br>Average process quality >60% & structure score >=80% considered high quality | Dosage of antibiotics or fluids and feeds based on national guidelines. No details given on other components                                                                           | • Composite measure; disaggregated by low, medium & high quality                                                                                                                                                   | Use of medical records limits assessment to indicators that are routinely documented. Medical records are not standardised across facilities, may have contributed to lower performance in non-public-sector facilities. Quality of care defined based on national standards of care; may not apply to private sector. Not able to assess mortality. |
| Nesbitt et al. 2013 (54)<br>*Newhints trial        | Childbirth: Intrapartum and immediate newborn care | 7 districts in Brong Ahafo, Ghana | To evaluate quality of routine and emergency intrapartum and postnatal care using a health facility assessment, and to estimate "effective coverage" of skilled attendance.                 | Effective coverage: proportion of births in facilities of high quality                                   | Delivery in a facility with "high" or "highest" quality in all four dimensions | Live births with known birthplace                                                                                                                                                                                            | • Surveillance data of all women of child bearing age in the Newhints trial area<br>• Nov 2008 – Dec 2009                                                                                                                                                                                                                      | • Health facility assessment<br>• Oct-Nov 2010                                        | Signal functions and corresponding drugs & equipment across, 4 dimensions: (1) routine delivery care, including labour and immediate postnatal care, (2) emergency obstetric care (EmOC), (3) emergency newborn care (EmNC), and                                                                                                                                                                                                                                                                                                                                                                                                                                                                                                                                                   | Based on functions included in other large-scale facility assessments in consultation with local clinicians:<br>• Gabrysch et al. 2012, New Signal Functions to Measure the Ability of | • Composite measure<br>• Estimates coverage & quality gap between coverage of facility delivery and provision of high quality care. Presented for each quality dimension separately and all 4 dimensions combined. | Relied on reported performance of signal functions as did not observe provision of care. May have overestimated quality of functions that did not validate with tracer items.                                                                                                                                                                        |

| Reference               | Intervention/service                                                                                                                                                                                                                                                                                                                           | Setting | Study aim(s)                                                                                                                                                    | Indicator                                                                                                                                                                                                                                                                                                                                                                                                                      | Numerator                                                                                                                                                                                                                                                                                                                                                                                                                                                                                                                  | Denominator                                                                                                                                                                                                                                                                                                                                                                                                       | Data source(s)                                                                       |                                                                                                            | Quality measure(s)<br>(see Appendix D for individual items)                                                                                                                                                                                                                                                                                                                                                                                       | How quality measures derived                                    | Results presented                                                                                                    | Limitations of EC measure reported by author                                                                                                                                                                                                                                                                                                                                       |
|-------------------------|------------------------------------------------------------------------------------------------------------------------------------------------------------------------------------------------------------------------------------------------------------------------------------------------------------------------------------------------|---------|-----------------------------------------------------------------------------------------------------------------------------------------------------------------|--------------------------------------------------------------------------------------------------------------------------------------------------------------------------------------------------------------------------------------------------------------------------------------------------------------------------------------------------------------------------------------------------------------------------------|----------------------------------------------------------------------------------------------------------------------------------------------------------------------------------------------------------------------------------------------------------------------------------------------------------------------------------------------------------------------------------------------------------------------------------------------------------------------------------------------------------------------------|-------------------------------------------------------------------------------------------------------------------------------------------------------------------------------------------------------------------------------------------------------------------------------------------------------------------------------------------------------------------------------------------------------------------|--------------------------------------------------------------------------------------|------------------------------------------------------------------------------------------------------------|---------------------------------------------------------------------------------------------------------------------------------------------------------------------------------------------------------------------------------------------------------------------------------------------------------------------------------------------------------------------------------------------------------------------------------------------------|-----------------------------------------------------------------|----------------------------------------------------------------------------------------------------------------------|------------------------------------------------------------------------------------------------------------------------------------------------------------------------------------------------------------------------------------------------------------------------------------------------------------------------------------------------------------------------------------|
|                         |                                                                                                                                                                                                                                                                                                                                                |         |                                                                                                                                                                 |                                                                                                                                                                                                                                                                                                                                                                                                                                |                                                                                                                                                                                                                                                                                                                                                                                                                                                                                                                            |                                                                                                                                                                                                                                                                                                                                                                                                                   | Household                                                                            | Facility/provider                                                                                          |                                                                                                                                                                                                                                                                                                                                                                                                                                                   |                                                                 |                                                                                                                      |                                                                                                                                                                                                                                                                                                                                                                                    |
|                         |                                                                                                                                                                                                                                                                                                                                                |         |                                                                                                                                                                 |                                                                                                                                                                                                                                                                                                                                                                                                                                |                                                                                                                                                                                                                                                                                                                                                                                                                                                                                                                            |                                                                                                                                                                                                                                                                                                                                                                                                                   |                                                                                      |                                                                                                            | (4) non-medical quality.<br><br><i>Categorical: highest/ basic/ intermediate/ low/ lowest</i><br>Calculated based on reported availability of drugs & equipment, reported frequency of performance of signal functions, number of trained health professionals & capacity for referral.                                                                                                                                                           | Health Facilities to Provide Routine and Emergency Newborn Care |                                                                                                                      |                                                                                                                                                                                                                                                                                                                                                                                    |
| Nguhiu et al. 2017 (40) | (1) Childbirth: skilled delivery & perinatal care<br><br>(2) Vaccination: complete set of basic vaccines<br><br>(3) Sick child care: care seeking for acute respiratory illness/fever<br><br>(4) Exclusive breastfeeding during first 6 months of life<br><br>(5) Sick child care: management of diarrhoea<br><br>(6) Insecticide treated nets | Kenya   | To estimate the levels of and inequities in EC of maternal and child health (MCH) services in Kenya, as a means of tracking the country's progress towards UHC. | Effective coverage: (1, 2 & 3) Propn of individuals in need of intervention who attended a health facility that was ready to provide care.<br><br>(4, 5 & 6) Propn of individuals in need of intervention who reported receipt of recommended components of care.<br><br>Overall EC estimate calculated as the average of 8 intervention-specific EC<br>* Note data on 2 interventions (family planning and ANC) not extracted | (1) Women attended by a SBA at most recent birth adjusted for facility quality<br><br>(2) All children who received complete set of vaccines adjusted for facility quality<br><br>(3) All children who sought advice from a medical provider adjusted for facility quality<br><br>(4) All children exclusively breastfed within the last 24hrs.<br><br>(5) All children given ORT or increased fluids<br><br>(6) All pregnant women & children who lived in a house with an ITN and slept under the net the previous night | (1) All women 15–49 yrs old with at least one child under 5 yrs<br><br>(2) All children alive aged 12-23 mnths<br><br>(3) All children under 5 yrs reported to have had acute respiratory illness and/or fever in preceding 2 wks<br><br>(4) All children aged 0-5 mths<br><br>(5) All children under 5 yrs reported to have had diarrhoea in preceding 4 wks<br><br>(6) All children (age NR assume under 5 yrs) | <ul style="list-style-type: none"> <li>DHS</li> <li>2003, 2008-2009, 2014</li> </ul> | <ul style="list-style-type: none"> <li>Interventions 1-3 only:</li> <li>SPA</li> <li>2004, 2010</li> </ul> | (1) HCW reports of 9 items incl. structural features, essential newborn care practices and administration of key medicines<br><br>(2 & 3) quality of primary care for children based on observed or HCW reports for 7 items incl. structural features and processes of care<br><br><i>Average score</i><br>Calculated at the provincial level<br><br>(4, 5 & 6) Receipt of intervention based on respondent's report.<br><br><i>Average score</i> | None given                                                      | <ul style="list-style-type: none"> <li>Composite measure</li> <li>Presents change in EC from 2003 to 2014</li> </ul> | Few other reliable national data sources in Kenya other than DHS (MICS only conducted in selected regions and not representative at country level)<br>Good estimates of quality of care requires information from different datasets; not available for all interventions. For those interventions where available in KSPA quality measure was applied equally to all individuals. |

| Reference               | Intervention/service                                                                                                                                                                           | Setting                                                                             | Study aim(s)                                                                                                                                                                                                                                                                                                                                              | Indicator                                                                                                                                                                                                                       | Numerator                                                                                                                                                                                                                                         | Denominator                                                                                                                                                                                                         | Data source(s)                                   |                   | Quality measure(s)<br>(see Appendix D for individual items)                                                                                                                                                                                                                                                                                      | How quality measures derived                                                                                                                                                                                                                                                                                                                                                             | Results presented                                                                                    | Limitations of EC measure reported by author                                                                                                                                                                                                                                                                                                                                                                                                                                                               |
|-------------------------|------------------------------------------------------------------------------------------------------------------------------------------------------------------------------------------------|-------------------------------------------------------------------------------------|-----------------------------------------------------------------------------------------------------------------------------------------------------------------------------------------------------------------------------------------------------------------------------------------------------------------------------------------------------------|---------------------------------------------------------------------------------------------------------------------------------------------------------------------------------------------------------------------------------|---------------------------------------------------------------------------------------------------------------------------------------------------------------------------------------------------------------------------------------------------|---------------------------------------------------------------------------------------------------------------------------------------------------------------------------------------------------------------------|--------------------------------------------------|-------------------|--------------------------------------------------------------------------------------------------------------------------------------------------------------------------------------------------------------------------------------------------------------------------------------------------------------------------------------------------|------------------------------------------------------------------------------------------------------------------------------------------------------------------------------------------------------------------------------------------------------------------------------------------------------------------------------------------------------------------------------------------|------------------------------------------------------------------------------------------------------|------------------------------------------------------------------------------------------------------------------------------------------------------------------------------------------------------------------------------------------------------------------------------------------------------------------------------------------------------------------------------------------------------------------------------------------------------------------------------------------------------------|
|                         |                                                                                                                                                                                                |                                                                                     |                                                                                                                                                                                                                                                                                                                                                           |                                                                                                                                                                                                                                 |                                                                                                                                                                                                                                                   |                                                                                                                                                                                                                     | Household                                        | Facility/provider |                                                                                                                                                                                                                                                                                                                                                  |                                                                                                                                                                                                                                                                                                                                                                                          |                                                                                                      |                                                                                                                                                                                                                                                                                                                                                                                                                                                                                                            |
| Nguyen et al. 2021 (44) | (1) Childbirth: birth care<br><br>(2) Child Growth Monitoring<br><br>(3) Sick child care: nutrition education, vit A supplementation, deworming, anaemia management ORS and zinc for diarrhoea | Bangladesh                                                                          | To adjust contact-based health coverage estimates in Bangladesh, taking into consideration the inputs required to deliver quality nutrition interventions across the continuum of care, specifically ANC and delivery for women and growth monitoring and curative care for young children.                                                               | Input-adjusted coverage: the proportion of women/children who sought care at a facility accounting for the type of facility where care was sought<br><br>* defines effective coverage using Marsh seven-step coverage framework | (1) Women 15–49 years old with at least one child under 5, whom for their most recent birth, reported delivery in a health facility<br><br>(2 -3) All children who had diarrhoea or ARI symptoms for whom care was sought from a medical provider | (1) Women 15–49 years old with at least one child under 5<br><br>(2) All children alive between 0 and 59 months;<br><br>(3) All children alive between 0 and 59 months who had diarrhoea or ARI in the last 2 weeks | • DHS<br>• 2014                                  | • SPA<br>• 2014   | Facility readiness, based on 5 attributes guided by SARA: (1) trained personnel, (2) guidelines, (3) equipment, (4) diagnostic capacity and (5) medicines.<br><br><i>Average score from 0 to 100</i><br>Calculated at facility-level and disaggregating by region and urban/rural location<br>Five domains weighted equally within each measure. | Based on the WHO's SARA theoretical framework.                                                                                                                                                                                                                                                                                                                                           | • Composite measure                                                                                  | Contact coverage based on woman's recall.<br>Underestimate contact coverage of growth monitoring services if well children are frequently brought to health facilities for this purpose.<br>SPA does not capture every aspect to measure facility readiness to provide nutrition interventions (such as the infrastructure to implement kangaroo mother care, calcium or food supplements for pregnant women, or IFA and food supplements for children).<br>Data do not allow calculation of care cascade. |
| Nguyen et al. 2016 (57) | Nutrition: Complementary foods with micronutrient powders                                                                                                                                      | 4 provinces in Vietnam (Hai Phong, Thai Nguyen, Quang Nam, and Ca Mau in the South) | To present the pilot's design, implementation, coverage results, and MNP use and compliance by caregivers. To provide recommendations on how the results from this pilot could help inform the strategy on home fortification of complementary foods with MNPs for micronutrient deficiency prevention, and how this model could be scaled up in Vietnam. | Effective coverage: the proportion of children that consumed at least 3 sachets of the National Institute of Nutrition-produced micronutrient powder in the last week                                                           | Number of children aged 6-59 mnths that consumed at least 3 sachets of the National Institute of Nutrition-produced micronutrient powder in the last one week                                                                                     | Number of children aged 6-59 mnths                                                                                                                                                                                  | • Household survey<br>• November - December 2014 | n/a               | Receipt and timing of supplement based on caregiver's report<br><br><i>Binary: taken as prescribed vs. not</i>                                                                                                                                                                                                                                   | Consumption per week based on WHO recommendations and the Home Fortification Technical Advisory Group Programmatic Brief:<br>• WHO. Guidelines: Use of Multiple Micronutrients Powders for Home Fortification of Foods Consumed by Infants and Children 6–23 Months of Age. 2011.<br>• HF-TAG. Programmatic Guidance Brief on Use of Micronutrient Powders (MNP) for Home Fortification. | • Coverage level, 4 steps: message coverage, contact coverage, partial coverage & effective coverage | Data was collected from caregivers at health centres which could have biased responses. Used one-week recall period to avoid recall bias. Questionnaire was developed to have harmonized questions for countries implementing MNP programs globally, some relevant indicators that would have helped better understand caregivers' behaviours/purchase trends/use of Bibomix in Vietnam were missing.                                                                                                      |

| Reference                                 | Intervention/service                                                           | Setting                             | Study aim(s)                                                                                                                                                                                                                                                                        | Indicator                                                                                                                                      | Numerator                                                                                                                                                                                                             | Denominator                                                 | Data source(s)                                                                                                |                   | Quality measure(s)<br>(see Appendix D for individual items)                                                                                                                                                                                                                                                                                    | How quality measures derived                                                                                                                                                                                                                                                                                                                                                                                                                                                                                                                                                                                                                                                            | Results presented                                                                                               | Limitations of EC measure reported by author                                                            |
|-------------------------------------------|--------------------------------------------------------------------------------|-------------------------------------|-------------------------------------------------------------------------------------------------------------------------------------------------------------------------------------------------------------------------------------------------------------------------------------|------------------------------------------------------------------------------------------------------------------------------------------------|-----------------------------------------------------------------------------------------------------------------------------------------------------------------------------------------------------------------------|-------------------------------------------------------------|---------------------------------------------------------------------------------------------------------------|-------------------|------------------------------------------------------------------------------------------------------------------------------------------------------------------------------------------------------------------------------------------------------------------------------------------------------------------------------------------------|-----------------------------------------------------------------------------------------------------------------------------------------------------------------------------------------------------------------------------------------------------------------------------------------------------------------------------------------------------------------------------------------------------------------------------------------------------------------------------------------------------------------------------------------------------------------------------------------------------------------------------------------------------------------------------------------|-----------------------------------------------------------------------------------------------------------------|---------------------------------------------------------------------------------------------------------|
|                                           |                                                                                |                                     |                                                                                                                                                                                                                                                                                     |                                                                                                                                                |                                                                                                                                                                                                                       |                                                             | Household                                                                                                     | Facility/provider |                                                                                                                                                                                                                                                                                                                                                |                                                                                                                                                                                                                                                                                                                                                                                                                                                                                                                                                                                                                                                                                         |                                                                                                                 |                                                                                                         |
| Okawa et al. 2019a (49)                   | (1) Childbirth: peripartum care<br><br>(2) postnatal care for mother & newborn | 1 urban and 1 rural region, Myanmar | To assess the contact of women and their newborns with healthcare providers, quality of care and quality-adjusted contacts during ANC, delivery and PNC, and to identify factors associated with having adequate contact and receiving high-quality care in Myanmar.                | Quality-adjusted contact: having adequate contact and receiving high-quality care.                                                             | (1) Attended by skilled care providers at a health care facility and receiving high-quality care.<br><br>(2) At least 3 contacts for PNC, with first contact within 24 hrs postpartum and receiving high-quality care | All women 6 wks to 12 mnths postpartum                      | <ul style="list-style-type: none"> <li>Household survey</li> <li>March 2016</li> </ul>                        | n/a               | <p>Content care based on women's self-reports.</p> <p>(1) 7 interventions for delivery</p> <p><i>Binary: all items present vs. not</i></p> <p>(2) 17 interventions for PNC (12 maternal and 5 newborn)</p> <p><i>Binary: threshold (highest quality vs. rest)</i><br/>High-quality: top 20 percentile</p>                                      | <p>Domain of competent care defined in the high-quality health system framework:</p> <ul style="list-style-type: none"> <li>Kruk et al. 2018 High-quality health systems in the Sustainable Development Goals era: time for a revolution.</li> </ul> <p>National guidelines:</p> <ul style="list-style-type: none"> <li>Ministry of Health and Sports. Maternal and Child Health Handbook. Nay Pyi Taw, Myanmar: Ministry of Health and Sports, Unknown</li> </ul> <p>International guidelines:</p> <ul style="list-style-type: none"> <li>WHO. Pregnancy, childbirth, postpartum and newborn care: a guide for essential practice. 3rd edn. Geneva, Switzerland: WHO, 2015.</li> </ul> | <ul style="list-style-type: none"> <li>Composite measure</li> </ul>                                             | Relies on women's recall on having received interventions. Only assessed one aspect of quality of care. |
| Okawa et al. 2019b (46)<br>*EMBRACE trial | (1) Childbirth: peripartum care<br><br>(2) postnatal care for mother & newborn | 3 rural sites, Ghana                | To examine the effects of the continuum of care intervention package on adequate contacts with healthcare providers and high-quality care by the mothers and their newborns compared with the standard maternal and newborn care under the national guidelines and to determine the | Adequate contacts with high quality care: Proportion of women who received adequate contacts with a healthcare provider and high-quality care. | (1) Skilled facility based delivery and received all components of care<br><br>(2) 3 timely contacts and received all components of care                                                                              | Women aged 15-49 yrs and delivered in 2 yrs prior to survey | <ul style="list-style-type: none"> <li>Household survey</li> <li>July-Sept 2014 &amp; Oct-Dec 2015</li> </ul> | n/a               | <p>Process-of-care dimension in Donabedian's framework</p> <p>(1) Three care items</p> <p>(2) Based on the number and timing of contacts and receipt of 14 care items</p> <p><i>Categorical: Inadequate contact regardless of quality, adequate contact with low or high quality care</i><br/>Low quality: <math>\leq 13</math> care items</p> | <ul style="list-style-type: none"> <li>Composite measure.</li> <li>Presents 3 outcomes: inadequate contact (<math>\leq 2</math> contacts or non-timely contacts), adequate contact with low quality care and adequate contact with high quality care</li> </ul>                                                                                                                                                                                                                                                                                                                                                                                                                         | No standardised measurement of quality available. Although value of each item not equal gave them equal weight. |                                                                                                         |

| Reference                                | Intervention/service                        | Setting                            | Study aim(s)                                                                                                                                                                                                                      | Indicator                                                                                                                                                                                                                                                                                                                                               | Numerator                                                                                                                                                                                      | Denominator                          | Data source(s)                                                                                                                     |                                                                                                                                                  | Quality measure(s)<br>(see Appendix D for individual items)                                                                                                                                                                                                                                                                                    | How quality measures derived                                                                                                                                                                                                                                                                              | Results presented                                                                                                                                                                                                                                                                                                                                                                                                                                                                                                                            | Limitations of EC measure reported by author                                                                                                                                                                                             |
|------------------------------------------|---------------------------------------------|------------------------------------|-----------------------------------------------------------------------------------------------------------------------------------------------------------------------------------------------------------------------------------|---------------------------------------------------------------------------------------------------------------------------------------------------------------------------------------------------------------------------------------------------------------------------------------------------------------------------------------------------------|------------------------------------------------------------------------------------------------------------------------------------------------------------------------------------------------|--------------------------------------|------------------------------------------------------------------------------------------------------------------------------------|--------------------------------------------------------------------------------------------------------------------------------------------------|------------------------------------------------------------------------------------------------------------------------------------------------------------------------------------------------------------------------------------------------------------------------------------------------------------------------------------------------|-----------------------------------------------------------------------------------------------------------------------------------------------------------------------------------------------------------------------------------------------------------------------------------------------------------|----------------------------------------------------------------------------------------------------------------------------------------------------------------------------------------------------------------------------------------------------------------------------------------------------------------------------------------------------------------------------------------------------------------------------------------------------------------------------------------------------------------------------------------------|------------------------------------------------------------------------------------------------------------------------------------------------------------------------------------------------------------------------------------------|
|                                          |                                             |                                    |                                                                                                                                                                                                                                   |                                                                                                                                                                                                                                                                                                                                                         |                                                                                                                                                                                                |                                      | Household                                                                                                                          | Facility/provider                                                                                                                                |                                                                                                                                                                                                                                                                                                                                                |                                                                                                                                                                                                                                                                                                           |                                                                                                                                                                                                                                                                                                                                                                                                                                                                                                                                              |                                                                                                                                                                                                                                          |
|                                          |                                             |                                    | factors associated with having adequate contacts with high-quality care.                                                                                                                                                          |                                                                                                                                                                                                                                                                                                                                                         |                                                                                                                                                                                                |                                      |                                                                                                                                    |                                                                                                                                                  | High-quality: All care items received                                                                                                                                                                                                                                                                                                          |                                                                                                                                                                                                                                                                                                           |                                                                                                                                                                                                                                                                                                                                                                                                                                                                                                                                              |                                                                                                                                                                                                                                          |
| Sharma et al. 2017 (41)                  | Childbirth: delivery care                   | Kenya                              | To assess whether high quality maternal care is equitably distributed by (1) mapping the quality of maternal care in facilities located in poorer versus wealthier areas of Kenya; and (2) comparing the quality of maternal care | Population access to quality care: percentage of the population with access to minimally adequate standard of maternal care.<br><br>(1) quality of maternal health care infrastructure<br><br>(2) quality of delivery care                                                                                                                              | (1) Population living within 5-km radius of a facility with adequate maternal care infrastructure<br><br>(2) Population living within 5-km radius of a facility with adequate delivery quality | Total population                     | <ul style="list-style-type: none"> <li>DHS</li> <li>Oxford Poverty &amp; Human Development Initiative</li> <li>2010</li> </ul>     | <ul style="list-style-type: none"> <li>SPA</li> <li>2014</li> </ul>                                                                              | Structural inputs (infrastructure, staffing & equipment) and clinical care processes.<br><br><i>Binary: threshold (adequate maternal care quality &lt;0.75)</i><br>Averaged to provide a facility-level score from 0 to 1.                                                                                                                     | Using Donabedian's framework. Applied the quality of the process of intrapartum and immediate postpartum care (QoPIPC) metric validated by Tripathi et al. 2015 [Development and Validation of an Index to Measure the Quality of Facility-Based Labor and Delivery Care Processes in Sub-Saharan Africa] | <ul style="list-style-type: none"> <li>Composite measure</li> <li>Infrastructure &amp; quality adjusted coverage presented separately</li> </ul>                                                                                                                                                                                                                                                                                                                                                                                             | Small number of observations; difficult to obtain multiple observations for low-volume facilities. Lack of universally defined minimum quality standards, selected 0.75 threshold on premise that women should receive most basic items. |
| Sheff et al 2020 (48)<br>* CHPS+ project | Vaccination: Complete set of basic vaccines | 7 districts in Volta Region, Ghana | Using a modified version of the 1978 Tanahashi model as an analytical framework, aims to examine the system of care at the community level in Ghana's Volta Region to highlight the continued reforms needed to achieve UHC.      | Quality coverage: the proportion of children who have received all vaccines mandated by Ghana's Expanded Programme on Immunisation by 24 months<br><br>* Two additional coverage measures calculated separately and are not included in extraction<br><br>(1) Availability coverage: the proportion of facilities with all health commodities and human | Number of children that received all vaccines on time                                                                                                                                          | Number of children aged 12-23 months | <ul style="list-style-type: none"> <li>Household survey incl. review of vaccination card</li> <li>April to October 2017</li> </ul> | <ul style="list-style-type: none"> <li>Health facility assessment</li> <li>July 2018</li> </ul> <p>* used to calculate availability coverage</p> | Receipt of complete package of vaccine on time: one dose of BCG at birth, three doses of the oral polio vaccine (excluding the dose given at birth), three doses of a DPT containing vaccine and hepatitis B vaccine at 6, 10, and 14 weeks, and one dose of the measles vaccine, all done by 24 months.<br><br><i>Binary: received or not</i> | Mandated by Ghana's Expanded Programme on Immunization (EPI)                                                                                                                                                                                                                                              | <ul style="list-style-type: none"> <li>Modified Tanahashi model, 5 steps: (1) availability of health services &amp; human resources, (2) geographic &amp; financial accessibility, (3) initial contact, (4) continued utilisation, (5) quality coverage.</li> </ul> <p>*Calculates two measures: (1) potential coverage, which includes availability and accessibility, calculated at the facility level, (2) actual coverage combining initial contact, continued utilisation and quality coverage, calculated at the population level.</p> | Survey instruments not designed specifically for the Tanahashi model; missing more specific information such as vaccine availability by antigen. Range of data sources needed to develop these models may not be widely available.       |

| Reference                                     | Intervention/service                                                                                  | Setting              | Study aim(s)                                                                                                                                                                                                                                                                                              | Indicator                                                                                                                                                                            | Numerator                                                                                                                                                | Denominator                                                                      | Data source(s)                                                                        |                       | Quality measure(s)<br>(see Appendix D<br>for individual<br>items)                                                    | How quality<br>measures<br>derived                                                                                                                                                                                                                                                                                                                                                                                                                                                                                                                                                              | Results presented                                                   | Limitations of EC<br>measure reported<br>by author                                                                                                  |
|-----------------------------------------------|-------------------------------------------------------------------------------------------------------|----------------------|-----------------------------------------------------------------------------------------------------------------------------------------------------------------------------------------------------------------------------------------------------------------------------------------------------------|--------------------------------------------------------------------------------------------------------------------------------------------------------------------------------------|----------------------------------------------------------------------------------------------------------------------------------------------------------|----------------------------------------------------------------------------------|---------------------------------------------------------------------------------------|-----------------------|----------------------------------------------------------------------------------------------------------------------|-------------------------------------------------------------------------------------------------------------------------------------------------------------------------------------------------------------------------------------------------------------------------------------------------------------------------------------------------------------------------------------------------------------------------------------------------------------------------------------------------------------------------------------------------------------------------------------------------|---------------------------------------------------------------------|-----------------------------------------------------------------------------------------------------------------------------------------------------|
|                                               |                                                                                                       |                      |                                                                                                                                                                                                                                                                                                           |                                                                                                                                                                                      |                                                                                                                                                          |                                                                                  | Household                                                                             | Facility/provi<br>der |                                                                                                                      |                                                                                                                                                                                                                                                                                                                                                                                                                                                                                                                                                                                                 |                                                                     |                                                                                                                                                     |
|                                               |                                                                                                       |                      |                                                                                                                                                                                                                                                                                                           | resources available<br><br>(2) Accessibility coverage: the proportion of women who have a valid NHIS card and the proportion of women living within 5km of a facility                |                                                                                                                                                          |                                                                                  |                                                                                       |                       |                                                                                                                      |                                                                                                                                                                                                                                                                                                                                                                                                                                                                                                                                                                                                 |                                                                     |                                                                                                                                                     |
| Shibanuma et al. 2018 (58)<br>* EMBRACE trial | (1) Childbirth: facility delivery<br><br>(2) PNC within 48 hrs and around 2 and 6 weeks post-delivery | 3 rural sites, Ghana | To compare continuum of care achievement in MNCH based on two measurements: (1) visits and (2) key components of services that were received. To compare the factors affecting continuum of care based on the two different measurements. Finally, to examine whether achievements differed across areas. | Continuum of Care achievement: Proportion of women and children who received MNCH services at delivery and post-delivery stages and who received the key components of MNCH services | (1) delivered at a health facility and received all components of care<br><br>(2) both mother and newborn received timely PNC and all components of care | Women aged 15-49 yrs who had a live birth or stillbirth in 2 yr prior to survey. | <ul style="list-style-type: none"> <li>Household survey</li> <li>July 2013</li> </ul> | n/a                   | Receipt of key components of care based on women's self-reports<br><br><i>Binary: received all components or not</i> | International guidelines: <ul style="list-style-type: none"> <li>The Partnership for Maternal, Newborn &amp; Child Health. A global review of the key interventions related to reproductive, maternal, newborn and child health (RMNCH). Geneva, Switzerland: PMNCH, 2011</li> <li>WHO. Guidelines on maternal, newborn, child and adolescent health approved by the WHO guidelines review committee: Recommendations on maternal and perinatal health. Geneva, Switzerland: WHO, 2013</li> <li>United Nations Children's Fund. Committing to child survival: A promise renewed. New</li> </ul> | <ul style="list-style-type: none"> <li>Composite measure</li> </ul> | Visits and receipt of care measured based on women's self-reports; included only key components that could be ascertained in interviews with women. |

| Reference                 | Intervention/service        | Setting                                                                              | Study aim(s)                                                                                                                                                                                                                                                                                                                                          | Indicator                                                                                                                             | Numerator                                                                                                                   | Denominator                                     | Data source(s)                                                                                                 |                       | Quality measure(s)<br>(see Appendix D<br>for individual<br>items)                                             | How quality<br>measures<br>derived                                                                                                                                                                                                                                                                                                                                                                                                                                                                                                                                                                                                                                                               | Results presented                                                                                                                                                                                                                             | Limitations of EC<br>measure reported<br>by author                                                                                                                                                                                                                                                                             |
|---------------------------|-----------------------------|--------------------------------------------------------------------------------------|-------------------------------------------------------------------------------------------------------------------------------------------------------------------------------------------------------------------------------------------------------------------------------------------------------------------------------------------------------|---------------------------------------------------------------------------------------------------------------------------------------|-----------------------------------------------------------------------------------------------------------------------------|-------------------------------------------------|----------------------------------------------------------------------------------------------------------------|-----------------------|---------------------------------------------------------------------------------------------------------------|--------------------------------------------------------------------------------------------------------------------------------------------------------------------------------------------------------------------------------------------------------------------------------------------------------------------------------------------------------------------------------------------------------------------------------------------------------------------------------------------------------------------------------------------------------------------------------------------------------------------------------------------------------------------------------------------------|-----------------------------------------------------------------------------------------------------------------------------------------------------------------------------------------------------------------------------------------------|--------------------------------------------------------------------------------------------------------------------------------------------------------------------------------------------------------------------------------------------------------------------------------------------------------------------------------|
|                           |                             |                                                                                      |                                                                                                                                                                                                                                                                                                                                                       |                                                                                                                                       |                                                                                                                             |                                                 | Household                                                                                                      | Facility/provi<br>der |                                                                                                               |                                                                                                                                                                                                                                                                                                                                                                                                                                                                                                                                                                                                                                                                                                  |                                                                                                                                                                                                                                               |                                                                                                                                                                                                                                                                                                                                |
|                           |                             |                                                                                      |                                                                                                                                                                                                                                                                                                                                                       |                                                                                                                                       |                                                                                                                             |                                                 |                                                                                                                |                       |                                                                                                               | <p>York, NY, USA:<br/>United Nations<br/>Children's<br/>Fund, 2014.</p> <ul style="list-style-type: none"> <li>WHO.<br/>Pregnancy,<br/>childbirth,<br/>postpartum,<br/>and newborn<br/>care: A guide<br/>for essential<br/>practice.<br/>Geneva,<br/>Switzerland:<br/>WHO, 2006</li> </ul> <p>Published<br/>literature:</p> <ul style="list-style-type: none"> <li>Singh et al.<br/>2014 Postnatal<br/>care by<br/>provider type<br/>and neonatal<br/>death in sub-<br/>Saharan Africa:<br/>a multilevel<br/>analysis</li> <li>Adegoke et al.<br/>2009 Skilled<br/>birth<br/>attendance-<br/>lessons learnt</li> </ul> <p>Comments from<br/>health<br/>administrators at<br/>the study site.</p> |                                                                                                                                                                                                                                               |                                                                                                                                                                                                                                                                                                                                |
| Smith et al.<br>2010 (51) | Sick child care:<br>Malaria | 3 districts<br>(Tambacounda,<br>Koumpentoum<br>and Maka<br>Coulibantang),<br>Senegal | To analyse the<br>application of a<br>diagnostic<br>approach to the<br>coverage of<br>prompt and<br>effective<br>treatment for<br>febrile children in<br>rural Senegal,<br>assessing the<br>critical steps at<br>which children<br>exit from the<br>treatment<br>pathway,<br>stratified<br>according to<br>source of first<br>advice or<br>treatment. | Treatment<br>pathway:<br>Proportion of<br>children under<br>the age of five<br>that received<br>artesunate-<br>amodiaquine<br>(AS-AQ) | The number of<br>children under<br>the age of five<br>that sought<br>care within 48<br>hours and that<br>received AS-<br>AQ | Number of<br>children aged<br>under five years. | <ul style="list-style-type: none"> <li>Household<br/>survey</li> <li>August-<br/>September<br/>2008</li> </ul> | n/a                   | <p>Prompt and effective<br/>treatment based on<br/>self-reports</p> <p><i>Binary: received or<br/>not</i></p> | <p>Based on the<br/>National Malaria<br/>Control<br/>Programme,<br/>which specifies<br/>first line anti-<br/>malarial, and the<br/>Roll Back Malaria<br/>(RBM) access<br/>indicator.</p>                                                                                                                                                                                                                                                                                                                                                                                                                                                                                                         | <ul style="list-style-type: none"> <li>Treatment pathway, 5<br/>steps: fever in the previous<br/>two weeks, sought any<br/>advice/treatment, care<br/>sought within 48 hours,<br/>received any anti-malarial,<br/>received an ACT.</li> </ul> | <ul style="list-style-type: none"> <li>Limited sample<br/>size that led to wide<br/>confidence<br/>intervals;</li> <li>Expectations of<br/>inaccuracies in the<br/>drugs provided<br/>given it is based on<br/>recall but this was<br/>minimized with the<br/>presentation of a<br/>photo during the<br/>interview;</li> </ul> |

| Reference                               | Intervention/service                       | Setting                                                              | Study aim(s)                                                                                                                                                                                                                                                                                        | Indicator                                                                                                                                                | Numerator                                                                                                   | Denominator                                                                                                            | Data source(s)                                                                                                                                                                                               |                                                                                                                                                                                                            | Quality measure(s)<br>(see Appendix D for individual items)                                                                                                                                                                                                                                                                                                                                                        | How quality measures derived                                                                                                                                                                                                                                                                                                                                                                                                                                                       | Results presented                                                                                                                  | Limitations of EC measure reported by author                                                                                                                                                                                                                                                                                                                                                                                                                                                       |
|-----------------------------------------|--------------------------------------------|----------------------------------------------------------------------|-----------------------------------------------------------------------------------------------------------------------------------------------------------------------------------------------------------------------------------------------------------------------------------------------------|----------------------------------------------------------------------------------------------------------------------------------------------------------|-------------------------------------------------------------------------------------------------------------|------------------------------------------------------------------------------------------------------------------------|--------------------------------------------------------------------------------------------------------------------------------------------------------------------------------------------------------------|------------------------------------------------------------------------------------------------------------------------------------------------------------------------------------------------------------|--------------------------------------------------------------------------------------------------------------------------------------------------------------------------------------------------------------------------------------------------------------------------------------------------------------------------------------------------------------------------------------------------------------------|------------------------------------------------------------------------------------------------------------------------------------------------------------------------------------------------------------------------------------------------------------------------------------------------------------------------------------------------------------------------------------------------------------------------------------------------------------------------------------|------------------------------------------------------------------------------------------------------------------------------------|----------------------------------------------------------------------------------------------------------------------------------------------------------------------------------------------------------------------------------------------------------------------------------------------------------------------------------------------------------------------------------------------------------------------------------------------------------------------------------------------------|
|                                         |                                            |                                                                      |                                                                                                                                                                                                                                                                                                     |                                                                                                                                                          |                                                                                                             |                                                                                                                        | Household                                                                                                                                                                                                    | Facility/provider                                                                                                                                                                                          |                                                                                                                                                                                                                                                                                                                                                                                                                    |                                                                                                                                                                                                                                                                                                                                                                                                                                                                                    |                                                                                                                                    |                                                                                                                                                                                                                                                                                                                                                                                                                                                                                                    |
| Wang et al. 2019 (36)                   | Childbirth: facility delivery              | 6 countries: Bangladesh, Haiti, Malawi, Nepal, Senegal, and Tanzania | To estimate the effective coverage of obstetric and newborn care with a refined approach. This method takes into account different types of facilities where women delivered their births. We also estimated the uncertainty of the effective coverage estimates, which has not been commonly done. | Effective coverage: Calculated among individuals in need of care as the mathematical product of the use of the service and the quality of care provided. | Facility readiness for the type of facility where delivery care was sought.                                 | Number of births in the 2 yrs preceding the survey                                                                     | <ul style="list-style-type: none"> <li>DHS</li> <li>Bangladesh : 2014,</li> <li>Haiti: 2012,</li> <li>Malawi: 2015-2016,</li> <li>Nepal: 2016,</li> <li>Senegal: 2016,</li> <li>Tanzania: 2015-16</li> </ul> | <ul style="list-style-type: none"> <li>SPA</li> <li>Bangladesh : 2014,</li> <li>Haiti: 2013,</li> <li>Malawi: 2013-14,</li> <li>Nepal: 2015,</li> <li>Senegal: 2015,</li> <li>Tanzania: 2014-15</li> </ul> | <p>Facility readiness, 6 domains: (1) comprehensive EOC, (2) newborn signal functions, (3) infrastructure, (4) equipment, (5) supplies &amp; commodities, (6) the availability of guidelines trained personnel.</p> <p><i>Average score: equal weight approach</i><br/>Equal weight given to 6 domains and to all indicators within the same domain; sum of all domains standardised to have a maximum of 100.</p> | <p>International guidelines:</p> <ul style="list-style-type: none"> <li>WHO. Service Availability and Readiness Assessment (SARA): An annual monitoring system for service delivery Reference Manual. Geneva, Switzerland: WHO; 2015.</li> <li>Save the Children Federation I. Newborn indicators 2017 Systematic review:</li> <li>Gabrysch et al. 2012, New Signal Functions to Measure the Ability of Health Facilities to Provide Routine and Emergency Newborn Care</li> </ul> | <ul style="list-style-type: none"> <li>Composite measure</li> </ul>                                                                | The readiness score itself cannot identify specific deficits. Facilities with a similar score could possess quite different specific tracer items.                                                                                                                                                                                                                                                                                                                                                 |
| Willey et al. 2018 (56)<br>*EQUIP study | Childbirth: Basic emergency obstetric care | 1 district in Uganda                                                 | To explore methods for linking access to skilled birth attendance (SBA) from household surveys to data on provision of care from facility surveys with the aim of estimating population level effective coverage reflecting access to quality care.                                                 | Effective coverage of skilled birth attendance in facilities ready to provide basic emergency obstetric and newborn care.                                | Product of prevalence of attendance by an SBA in a health facility and the prevalence of facility readiness | (1-2) women aged 13-49 with a live birth in previous 12 mnths<br><br>(3) newborns born alive in previous 12 mnths (12) | <ul style="list-style-type: none"> <li>HH survey</li> <li>Jan 2012 – Dec 2013</li> </ul>                                                                                                                     | <ul style="list-style-type: none"> <li>Facility survey</li> <li>Nov 2012 – Feb 2013</li> </ul>                                                                                                             | <p>Facility readiness, 6 components: (1) infrastructure, (2) infection prevention, (3) commodities to monitor and manage labour, (4) essential medicines, (5) commodities to provide neonatal resuscitation, (6) commodities to provide clean cord care.</p> <p><i>Binary: all commodities for all 6 components available vs. not</i></p>                                                                          | <p>Systematic review:</p> <ul style="list-style-type: none"> <li>Gabrysch et al. 2012, New Signal Functions to Measure the Ability of Health Facilities to Provide Routine and Emergency Newborn Care</li> </ul>                                                                                                                                                                                                                                                                   | <ul style="list-style-type: none"> <li>Composite measure</li> <li>EC estimates presented by different linking approach.</li> </ul> | <p>Relied on women's self-report of skilled birth attendance, which is susceptible to measurement error. Facility readiness surveys represent availability on the day of survey; analysis revealed that some but not all commodities were stable over time. Quality measure focused on commodities; did not incorporate availability, training or capability of health facility staff attending births and caring for newborns, nor estimates of coverage of actual life-saving behaviours. EC</p> |



| Reference | Intervention/service | Setting | Study aim(s) | Indicator | Numerator | Denominator | Data source(s) |                       | Quality measure(s)<br>(see Appendix D<br>for individual<br>items) | How quality<br>measures<br>derived | Results presented | Limitations of EC<br>measure reported<br>by author                                                          |
|-----------|----------------------|---------|--------------|-----------|-----------|-------------|----------------|-----------------------|-------------------------------------------------------------------|------------------------------------|-------------------|-------------------------------------------------------------------------------------------------------------|
|           |                      |         |              |           |           |             | Household      | Facility/provi<br>der |                                                                   |                                    |                   |                                                                                                             |
|           |                      |         |              |           |           |             |                |                       |                                                                   |                                    |                   | measure represents capacity to deliver quality care, rather than the quality of care delivered in practice. |



|                                                     |  |  |  |  |                                                                                                                                                                              |                                                                                                                                                                                                                                                   |                  |  |  |  |                                                                                                                                                          |  |  |  |
|-----------------------------------------------------|--|--|--|--|------------------------------------------------------------------------------------------------------------------------------------------------------------------------------|---------------------------------------------------------------------------------------------------------------------------------------------------------------------------------------------------------------------------------------------------|------------------|--|--|--|----------------------------------------------------------------------------------------------------------------------------------------------------------|--|--|--|
|                                                     |  |  |  |  | radio or phone (landline or cellular)                                                                                                                                        | include private cell phones unless the facility reimburses for cost of phone calls. This will not include payphones outside of the facility.                                                                                                      |                  |  |  |  |                                                                                                                                                          |  |  |  |
| Computer with email/internet access                 |  |  |  |  |                                                                                                                                                                              | Reported availability: Facility has a functioning computer and has access to email/internet with internet working on the day of the survey.                                                                                                       |                  |  |  |  |                                                                                                                                                          |  |  |  |
| Delivery beds                                       |  |  |  |  | Observed availability of a delivery bed                                                                                                                                      |                                                                                                                                                                                                                                                   | Delivery table   |  |  |  | Delivery bed                                                                                                                                             |  |  |  |
| Examination light                                   |  |  |  |  | Observed availability and reported functionality of a spotlight source (or flashlight)                                                                                       | Items observed and functioning in the main service area: Spotlight source that can be used for patient examinations. A functional flashlight is accepted.                                                                                         | Examination lamp |  |  |  | Observed a functioning spotlight source that can be used for patient examinations in service area or adjacent area. A functional flashlight is accepted. |  |  |  |
| Facility register                                   |  |  |  |  |                                                                                                                                                                              |                                                                                                                                                                                                                                                   |                  |  |  |  |                                                                                                                                                          |  |  |  |
| Patient toilet clean & water & soap for handwashing |  |  |  |  |                                                                                                                                                                              |                                                                                                                                                                                                                                                   |                  |  |  |  |                                                                                                                                                          |  |  |  |
| Power/Electricity                                   |  |  |  |  | Reported availability of electricity for lights and communication (at a minimum) from any power source, with no break in power for more than 2 h per day during the past 7 d | Reported availability: Facility routinely has electricity for lights and communication (at a minimum) from any power source during normal working hours; there has not been a break in power for more than 2 hours per day during the past 7 days | Electricity      |  |  |  |                                                                                                                                                          |  |  |  |

|                       |  |  |  |  |                                                                                                                                                              |                                                                                                                                                                                                                                                                                                                                                                                                                         |                   |  |  |  |  |  |  |  |
|-----------------------|--|--|--|--|--------------------------------------------------------------------------------------------------------------------------------------------------------------|-------------------------------------------------------------------------------------------------------------------------------------------------------------------------------------------------------------------------------------------------------------------------------------------------------------------------------------------------------------------------------------------------------------------------|-------------------|--|--|--|--|--|--|--|
| Private delivery room |  |  |  |  |                                                                                                                                                              | Observed availability: Private room or screened off area available in main service area (usually the general outpatient service area), a sufficient distance from sites where providers/clients routinely may be, so that a normal conversation could be held without being overheard, and without the client being observed                                                                                            |                   |  |  |  |  |  |  |  |
| Rooming in            |  |  |  |  |                                                                                                                                                              |                                                                                                                                                                                                                                                                                                                                                                                                                         |                   |  |  |  |  |  |  |  |
| Sanitation            |  |  |  |  | Reported availability of improved sanitation: flush/pour flush to piped sewer system or septic tank or pit latrine, pit latrine with slab, composting toilet | Observed availability: The toilet/latrine is classified using uniform criteria for improved sanitation promoted by UNICEF. These include the following: Flush/pour flush to piped sewer system or septic tank or pit latrine, pit latrine (ventilated improved pit (VIP) or other) with slab, composting toilet. There is adequate sanitation facilities accessible (unlocked or key available) for clients on premises | Toilet facilities |  |  |  |  |  |  |  |

|                                                    |  |  |  |  |                                                                                                                                                                                     |                                                                                                                                                                                                                                                                                                                                                                                                                                  |             |  |  |  |  |                                                                                                                       |  |                       |
|----------------------------------------------------|--|--|--|--|-------------------------------------------------------------------------------------------------------------------------------------------------------------------------------------|----------------------------------------------------------------------------------------------------------------------------------------------------------------------------------------------------------------------------------------------------------------------------------------------------------------------------------------------------------------------------------------------------------------------------------|-------------|--|--|--|--|-----------------------------------------------------------------------------------------------------------------------|--|-----------------------|
| Water supply                                       |  |  |  |  | Observed availability of an improved water source within 500 meters of facility: piped, public tap, standpipe, tubewell/bore hole, protected dug well, protected spring, rain water | Observed availability: Improved water source uses uniform definitions for safe water sources promoted by UNICEF. These include the following: Piped, public tap, standpipe, tubewell/bore hole, protected dug well, protected spring, rain water. NOTE: The type of base for the standpipe or tubewell is not considered for this question. The water source is located inside the facility or within the ground of the facility | Clean water |  |  |  |  |                                                                                                                       |  |                       |
| <b>Inputs: Staffing, training &amp; guidelines</b> |  |  |  |  |                                                                                                                                                                                     |                                                                                                                                                                                                                                                                                                                                                                                                                                  |             |  |  |  |  |                                                                                                                       |  |                       |
| Checklist/job aid                                  |  |  |  |  |                                                                                                                                                                                     | Check-lists and/or job-aids for essential childbirth care. Guidelines observed in service area.                                                                                                                                                                                                                                                                                                                                  |             |  |  |  |  | checklist/job aid                                                                                                     |  |                       |
| Guidelines: BEmONC                                 |  |  |  |  |                                                                                                                                                                                     |                                                                                                                                                                                                                                                                                                                                                                                                                                  |             |  |  |  |  | guidelines for BEmONC                                                                                                 |  | guidelines for BEmONC |
| Guidelines: CEmONC                                 |  |  |  |  |                                                                                                                                                                                     | Country adapt to which guidelines are required/accepted. Guidelines observed in service area.                                                                                                                                                                                                                                                                                                                                    |             |  |  |  |  | guidelines for CEmONC                                                                                                 |  |                       |
| Guidelines: essential childbirth care              |  |  |  |  |                                                                                                                                                                                     | Guidelines for essential childbirth care. Country adapt to which guidelines are required/accepted. Guidelines                                                                                                                                                                                                                                                                                                                    |             |  |  |  |  | Guidelines for essential childbirth observed in service area. Country adapt to which guidelines are required/accepted |  |                       |



|                                                                           |  |  |  |  |  |                                                                                                                                                                                                                                                |  |  |  |  |                                |  |  |  |
|---------------------------------------------------------------------------|--|--|--|--|--|------------------------------------------------------------------------------------------------------------------------------------------------------------------------------------------------------------------------------------------------|--|--|--|--|--------------------------------|--|--|--|
| Training: KMC                                                             |  |  |  |  |  |                                                                                                                                                                                                                                                |  |  |  |  |                                |  |  |  |
| Training: neonatal resuscitation                                          |  |  |  |  |  | At least one staff member providing the service trained in newborn resuscitation using bag and mask in the last two years. Interview response from in-charge of service area day of survey.                                                    |  |  |  |  |                                |  |  |  |
| Training: newborn infection and management (inlc. Injectable antibiotics) |  |  |  |  |  |                                                                                                                                                                                                                                                |  |  |  |  |                                |  |  |  |
| Training: routine labour and delivery care                                |  |  |  |  |  | At least one staff member providing the service trained in essential childbirth care in the last two years (other than training on newborn resuscitation using bag and mask). Interview response from in-charge of service area day of survey. |  |  |  |  | 1.qualified staff<br>2.trained |  |  |  |
| Training: thermal care                                                    |  |  |  |  |  |                                                                                                                                                                                                                                                |  |  |  |  |                                |  |  |  |
| Skilled birth attendant                                                   |  |  |  |  |  |                                                                                                                                                                                                                                                |  |  |  |  | skilled person<br>24 hrs       |  |  |  |
| <b>Inputs: Supplies &amp; commodities</b>                                 |  |  |  |  |  |                                                                                                                                                                                                                                                |  |  |  |  |                                |  |  |  |
| Amlodipine tablet or alternative calcium channel blocker                  |  |  |  |  |  | Observed in pharmacy or in area where they are routinely stored, at least one with valid expiration date.                                                                                                                                      |  |  |  |  |                                |  |  |  |
| Amoxicillin syrup/suspension or dispersible tablet                        |  |  |  |  |  | Observed in pharmacy or in area where they are routinely stored, at least one with                                                                                                                                                             |  |  |  |  |                                |  |  |  |

|                                 |  |  |  |  |                                                                                                                                                             |                                                                                                                                                                     |                   |  |  |  |                                                                                                                                                |              |                         |  |
|---------------------------------|--|--|--|--|-------------------------------------------------------------------------------------------------------------------------------------------------------------|---------------------------------------------------------------------------------------------------------------------------------------------------------------------|-------------------|--|--|--|------------------------------------------------------------------------------------------------------------------------------------------------|--------------|-------------------------|--|
|                                 |  |  |  |  |                                                                                                                                                             | valid expiration date.                                                                                                                                              |                   |  |  |  |                                                                                                                                                |              |                         |  |
| Amoxicillin tablet              |  |  |  |  |                                                                                                                                                             | Respiratory antibiotic. Observed in pharmacy or in area where they are routinely stored, at least one with valid expiration date.                                   |                   |  |  |  |                                                                                                                                                |              |                         |  |
| Ampicillin powder for injection |  |  |  |  |                                                                                                                                                             | Observed in pharmacy or in area where they are routinely stored, at least one with valid expiration date.                                                           |                   |  |  |  |                                                                                                                                                |              |                         |  |
| Antibiotic eye ointment         |  |  |  |  | Observed availability of at least one valid unit of antibiotic eye ointment (tetracycline or other) for newborns in service area or where routinely stocked | Antibiotic eye ointment for newborn. Observed in service area OR where routinely stored; in stock with at least one valid.                                          |                   |  |  |  | Antibiotic eye ointment for newborn. Observed in service area OR where routinely stored; in stock with at least one valid.                     | Eye ointment |                         |  |
| Antibiotics for preterm         |  |  |  |  |                                                                                                                                                             |                                                                                                                                                                     |                   |  |  |  |                                                                                                                                                |              | Antibiotics for preterm |  |
| Anticonvulsants                 |  |  |  |  | Observed availability of at least one valid unit of injectable magnesium sulphate or diazepam in service area or where routinely stocked                    | Magnesium sulphate 50% injection or alternative strength. Observed in service area OR where routinely stored; in stock with at least one valid.                     | Magnesium sulfate |  |  |  | Magnesium sulphate 50% injection or alternative strength. Observed in service area OR where routinely stored; in stock with at least one valid |              |                         |  |
| Storage of infectious waste     |  |  |  |  |                                                                                                                                                             | Waste receptacle (pedal bin) with lid and plastic bin liner. Observed availability in all three main service areas: general OPD, HIV testing area, and surgery area |                   |  |  |  |                                                                                                                                                |              |                         |  |



|                                                                 |  |  |  |  |  |                                                                                                                                                                                                                                                                                             |                         |  |  |  |                                                                                         |  |  |  |
|-----------------------------------------------------------------|--|--|--|--|--|---------------------------------------------------------------------------------------------------------------------------------------------------------------------------------------------------------------------------------------------------------------------------------------------|-------------------------|--|--|--|-----------------------------------------------------------------------------------------|--|--|--|
| Aspirin cap/tab                                                 |  |  |  |  |  | Observed in pharmacy or in area where they are routinely stored, at least one with valid expiration date.                                                                                                                                                                                   |                         |  |  |  |                                                                                         |  |  |  |
| ATC for mother                                                  |  |  |  |  |  |                                                                                                                                                                                                                                                                                             | Apricitabine for mother |  |  |  |                                                                                         |  |  |  |
| Beclometasone inhaler                                           |  |  |  |  |  | Observed in pharmacy or in area where they are routinely stored, at least one with valid expiration date.                                                                                                                                                                                   |                         |  |  |  |                                                                                         |  |  |  |
| Beta blocker (e.g.bisoprolol, metoprolol, carvedilol, atenolol) |  |  |  |  |  | Observed in pharmacy or in area where they are routinely stored, at least one with valid expiration date.                                                                                                                                                                                   |                         |  |  |  |                                                                                         |  |  |  |
| Blood glucose                                                   |  |  |  |  |  | Glucometer and glucometer test strips. Able to conduct the test on-site (in the facility) and functioning equipment and reagents needed to conduct the test are observed on-site on the day of the survey. These may be in a laboratory or in the service area where the test is conducted. |                         |  |  |  |                                                                                         |  |  |  |
| Blood pressure apparatus                                        |  |  |  |  |  | Items observed and functioning in the main service area: Digital BP machine or manual sphygmoman                                                                                                                                                                                            | Blood pressure cuff     |  |  |  | Digital BP machine or manual sphygmomanometer with stethoscope observed in service area |  |  |  |

|                                                                                                                                                                               |  |  |  |  |                                                                                                                                                                             |                                                                                                                                                                  |              |  |  |  |                                                                                                                                                     |                                                               |                                                                                                                                             |  |
|-------------------------------------------------------------------------------------------------------------------------------------------------------------------------------|--|--|--|--|-----------------------------------------------------------------------------------------------------------------------------------------------------------------------------|------------------------------------------------------------------------------------------------------------------------------------------------------------------|--------------|--|--|--|-----------------------------------------------------------------------------------------------------------------------------------------------------|---------------------------------------------------------------|---------------------------------------------------------------------------------------------------------------------------------------------|--|
|                                                                                                                                                                               |  |  |  |  |                                                                                                                                                                             | ometer with stethoscope                                                                                                                                          |              |  |  |  |                                                                                                                                                     |                                                               |                                                                                                                                             |  |
| Carbamazepine tablet                                                                                                                                                          |  |  |  |  |                                                                                                                                                                             | Observed in pharmacy or in area where they are routinely stored, at least one with valid expiration date.                                                        |              |  |  |  |                                                                                                                                                     |                                                               |                                                                                                                                             |  |
| Ceftriaxone injection                                                                                                                                                         |  |  |  |  |                                                                                                                                                                             | 2nd line injectable antibiotic. Observed in pharmacy or in area where they are routinely stored, at least one with valid expiration date.                        |              |  |  |  |                                                                                                                                                     |                                                               |                                                                                                                                             |  |
| Chlorhexidine                                                                                                                                                                 |  |  |  |  |                                                                                                                                                                             |                                                                                                                                                                  |              |  |  |  |                                                                                                                                                     | Chlorhexidine for the newborn cord                            |                                                                                                                                             |  |
| Clock/timer/watch                                                                                                                                                             |  |  |  |  |                                                                                                                                                                             |                                                                                                                                                                  | Clock        |  |  |  |                                                                                                                                                     |                                                               |                                                                                                                                             |  |
| Cloth to dry/wrap baby                                                                                                                                                        |  |  |  |  |                                                                                                                                                                             |                                                                                                                                                                  |              |  |  |  |                                                                                                                                                     | Clean cloths/towels to dry the baby<br>Cloth to wrap the baby |                                                                                                                                             |  |
| Corticosteroids                                                                                                                                                               |  |  |  |  |                                                                                                                                                                             |                                                                                                                                                                  |              |  |  |  |                                                                                                                                                     |                                                               | Betamethasone or dexamethasone. Observed available in pharmacy or where they are routinely stored, at least one with valid expiration date. |  |
| Delivery pack<br>OR all the following individual equipment:<br>cord clamp, episiotomy scissors, scissors or blade to cut cord, suture material with needle, and needle holder |  |  |  |  | Observed availability of at least one delivery pack<br>OR all the following individual equipment:<br>cord clamp, episiotomy scissors, scissors or blade to cut cord, suture | Delivery pack<br>OR cord clamp, episiotomy scissors, scissors/blade to cut cord, suture material with needle, AND needle holder. Observed availability, reported | Delivery kit |  |  |  | Observed delivery pack<br>OR cord clamp, episiotomy scissors, scissors/blade to cut cord, suture material with needle, AND needle holder in service |                                                               |                                                                                                                                             |  |

|                                                                                      |  |                                                             |  |  |                                         |                                                                                                           |             |  |  |  |                       |                                                     |  |  |
|--------------------------------------------------------------------------------------|--|-------------------------------------------------------------|--|--|-----------------------------------------|-----------------------------------------------------------------------------------------------------------|-------------|--|--|--|-----------------------|-----------------------------------------------------|--|--|
|                                                                                      |  |                                                             |  |  | material with needle, and needle holder | functionality, and in service area or adjacent area.                                                      |             |  |  |  | area or adjacent area |                                                     |  |  |
| Delivery pack component: Cord clamps                                                 |  |                                                             |  |  |                                         |                                                                                                           | Cord clamps |  |  |  |                       | Cord ligatures                                      |  |  |
| Delivery pack component: Sterile scissors or new razor to cut cord                   |  |                                                             |  |  |                                         |                                                                                                           |             |  |  |  |                       | Sterile scissors or new razor blade to cut the cord |  |  |
| Delivery pack component: Sterile syringes and needles                                |  | Health facility with sterile syringes and needles available |  |  |                                         | Single use — standard disposable or auto-disable syringes. Observed availability anywhere in the facility |             |  |  |  |                       |                                                     |  |  |
| Delivery pack component: Sutures                                                     |  |                                                             |  |  |                                         |                                                                                                           | Sutures     |  |  |  |                       |                                                     |  |  |
| Diazepam injection                                                                   |  |                                                             |  |  |                                         | Observed in pharmacy or in area where they are routinely stored, at least one with valid expiration date. |             |  |  |  |                       |                                                     |  |  |
| Enalapril tablet or alternative ACE inhibitor e.g. lisinopril, ramipril, perindopril |  |                                                             |  |  |                                         | Observed in pharmacy or in area where they are routinely stored, at least one with valid expiration date. |             |  |  |  |                       |                                                     |  |  |
| Foetal Stethoscope                                                                   |  |                                                             |  |  |                                         |                                                                                                           |             |  |  |  |                       |                                                     |  |  |
| Fluoxetine tablet                                                                    |  |                                                             |  |  |                                         | Observed in pharmacy or in area where they are routinely stored, at least one with valid expiration date. |             |  |  |  |                       |                                                     |  |  |
| Gauze                                                                                |  |                                                             |  |  |                                         |                                                                                                           |             |  |  |  |                       | Gauze                                               |  |  |
| Gentamicin injection                                                                 |  |                                                             |  |  |                                         | Observed in pharmacy or in area where they are                                                            |             |  |  |  |                       |                                                     |  |  |

|                      |  |  |  |  |                                                     |                                                                                                                                                                                                                                                                                                                    |                      |  |  |  |                                                      |                |  |  |
|----------------------|--|--|--|--|-----------------------------------------------------|--------------------------------------------------------------------------------------------------------------------------------------------------------------------------------------------------------------------------------------------------------------------------------------------------------------------|----------------------|--|--|--|------------------------------------------------------|----------------|--|--|
|                      |  |  |  |  |                                                     | routinely stored, at least one with valid expiration date.                                                                                                                                                                                                                                                         |                      |  |  |  |                                                      |                |  |  |
| Glibenclamide tablet |  |  |  |  |                                                     | Oral treatment type 2 diabetes. Observed in pharmacy or in area where they are routinely stored, at least one with valid expiration date.                                                                                                                                                                          |                      |  |  |  |                                                      |                |  |  |
| Gloves               |  |  |  |  | Observed availability of latex gloves or equivalent | Latex gloves. If equivalent non latex gloves are available this is acceptable. Observed available in all four main service areas: general OPD, HIV testing area, basic obstetric and newborn care area and surgery area.                                                                                           | Gloves               |  |  |  | Sterile latex or equivalent observed in service area | Sterile gloves |  |  |
| Haemoglobin test kit |  |  |  |  |                                                     | This may include colorimeter OR haemoglobin meter OR hemocue. Able to conduct the test on-site (in the facility) and functioning equipment and reagents needed to conduct the test are observed on-site on the day of the survey. These may be in a laboratory or in the service area where the test is conducted. | Haemoglobin test kit |  |  |  |                                                      |                |  |  |

|                                                                              |  |  |  |  |                                                                                       |                                                                                                                                                                                                                                                                                                                                            |              |  |  |  |                                                                                                         |              |  |  |
|------------------------------------------------------------------------------|--|--|--|--|---------------------------------------------------------------------------------------|--------------------------------------------------------------------------------------------------------------------------------------------------------------------------------------------------------------------------------------------------------------------------------------------------------------------------------------------|--------------|--|--|--|---------------------------------------------------------------------------------------------------------|--------------|--|--|
| Haloperidol tablet                                                           |  |  |  |  |                                                                                       | Observed in pharmacy or in area where they are routinely stored, at least one with valid expiration date.                                                                                                                                                                                                                                  |              |  |  |  |                                                                                                         |              |  |  |
| Heat source move to infrastructure?                                          |  |  |  |  |                                                                                       |                                                                                                                                                                                                                                                                                                                                            |              |  |  |  |                                                                                                         |              |  |  |
| HIV diagnostic capacity                                                      |  |  |  |  |                                                                                       | RDT kit or ELISA test with ELISA washer, ELISA reader, incubator, specific assay kit. Able to conduct the test on-site (in the facility) and functioning equipment and reagents needed to conduct the test are observed on-site on the day of the survey. These may be in a laboratory or in the service area where the test is conducted. |              |  |  |  |                                                                                                         |              |  |  |
| Hydralazine                                                                  |  |  |  |  |                                                                                       |                                                                                                                                                                                                                                                                                                                                            | Hydralazine  |  |  |  |                                                                                                         |              |  |  |
| Infection control measures in delivery room                                  |  |  |  |  |                                                                                       |                                                                                                                                                                                                                                                                                                                                            |              |  |  |  |                                                                                                         |              |  |  |
| Infection control: Disinfectant                                              |  |  |  |  |                                                                                       |                                                                                                                                                                                                                                                                                                                                            | Disinfectant |  |  |  | Disinfectant                                                                                            | Disinfectant |  |  |
| Infection control: hand rub/disinfectant or delivery room has water and soap |  |  |  |  |                                                                                       | Soap and running water or alcohol based hand rub. Observed in service area.                                                                                                                                                                                                                                                                |              |  |  |  | Soap and running water OR alcohol based hand rub observed in service area                               |              |  |  |
| Infection control: Skin disinfectant                                         |  |  |  |  | Observed availability of skin disinfectant in service area or where routinely stocked | Skin disinfectant. Observed in service area OR where routinely stored; in stock with at least one valid.                                                                                                                                                                                                                                   |              |  |  |  | skin disinfectant. Observed in service area OR where routinely stored; in stock with at least one valid |              |  |  |

|                                     |  |  |  |  |                                                                                                                                                                                            |                                                                                                                                                                                                                                                                                                     |                                  |  |  |  |  |                                                                                                                                                                                                                                                                                                      |                                                                                                                                                                           |  |
|-------------------------------------|--|--|--|--|--------------------------------------------------------------------------------------------------------------------------------------------------------------------------------------------|-----------------------------------------------------------------------------------------------------------------------------------------------------------------------------------------------------------------------------------------------------------------------------------------------------|----------------------------------|--|--|--|--|------------------------------------------------------------------------------------------------------------------------------------------------------------------------------------------------------------------------------------------------------------------------------------------------------|---------------------------------------------------------------------------------------------------------------------------------------------------------------------------|--|
| Infusion set and intravenous fluids |  |  |  |  | Observed availability of infusion set and intravenous fluids (normal saline or Ringers Lactate or Dextrose 5%)                                                                             | Normal saline or Ringers Lactate, and Dextrose 5%. Observed in service area OR where routinely stored; in stock with at least one valid.                                                                                                                                                            | Intravenous fluids               |  |  |  |  | Normal saline or Ringers Lactate, and Dextrose 5%. Observed in service area OR where routinely stored; in stock with at least one valid.                                                                                                                                                             |                                                                                                                                                                           |  |
| Injectable antibiotics              |  |  |  |  | Observed availability of at least one valid unit of broad-spectrum injectable antibiotic (gentamicin, penicillin, or ampicillin or ceftriaxone) in service area or where routinely stocked | Broad-spectrum injectable antibiotic treatment of sepsis in mother and newborn-Specific combination-Ampicillin + gentamicin OR penicillin + gentamicin OR ceftriaxone OR as per country specific formulation. Observed in service area OR where routinely stored; in stock with at least one valid. | Injectable antibiotic for mother |  |  |  |  | Broad-spectrum injectable antibiotic treatment of sepsis in mother and newborn. Specific combination Ampicillin + gentamicin OR penicillin + gentamicin OR ceftriaxone OR as per country specific formulation. Observed in service area OR where routinely stored; in stock with at least one valid. | Procaine benzylpenicillin (PBP) or gentamicin and ceftriaxone. Observed available in pharmacy or where they are routinely stored, at least one with valid expiration date |  |
| Insulin regular injection           |  |  |  |  |                                                                                                                                                                                            | Observed in pharmacy or in area where they are routinely stored, at least one with valid expiration date.                                                                                                                                                                                           |                                  |  |  |  |  |                                                                                                                                                                                                                                                                                                      |                                                                                                                                                                           |  |
| Malaria diagnostic capacity         |  |  |  |  |                                                                                                                                                                                            | RDT kit or smear with microscope, slides, and Wright Giemsa stain. Able to conduct the test on-site (in the facility) and functioning equipment and reagents needed to conduct the test are                                                                                                         |                                  |  |  |  |  |                                                                                                                                                                                                                                                                                                      |                                                                                                                                                                           |  |

|                                                                    |  |  |  |  |                                                                               |                                                                                                                                                                   |                            |  |  |  |                                                                                                                       |  |  |  |
|--------------------------------------------------------------------|--|--|--|--|-------------------------------------------------------------------------------|-------------------------------------------------------------------------------------------------------------------------------------------------------------------|----------------------------|--|--|--|-----------------------------------------------------------------------------------------------------------------------|--|--|--|
|                                                                    |  |  |  |  |                                                                               | observed on-site on the day of the survey. These may be in a laboratory or in the service area where the test is conducted.                                       |                            |  |  |  |                                                                                                                       |  |  |  |
| Manual vacuum extractor                                            |  |  |  |  | Observed availability and reported functionality of a manual vacuum extractor | Manual vacuum extractor. Observed availability, reported functionality, and in service area or adjacent area.                                                     |                            |  |  |  | Observed manual vacuum extractor in service area or adjacent area                                                     |  |  |  |
| Measuring cup                                                      |  |  |  |  |                                                                               |                                                                                                                                                                   |                            |  |  |  |                                                                                                                       |  |  |  |
| Metformin tablet                                                   |  |  |  |  |                                                                               | Gastroesophageal reflux. Observed in pharmacy or in area where they are routinely stored, at least one with valid expiration date.                                |                            |  |  |  |                                                                                                                       |  |  |  |
| Neonatal antibiotic                                                |  |  |  |  |                                                                               |                                                                                                                                                                   | Neonatal antibiotic        |  |  |  |                                                                                                                       |  |  |  |
| Neonatal bag & mask                                                |  |  |  |  | Observed availability and reported functionality of a newborn bag and mask    | Newborn bag and mask (size 1 for term babies AND size 0 for preterm babies). Observed availability, reported functionality, and in service area or adjacent area. | Neonatal ambu-bag and mask |  |  |  | Observed newborn bag and mask (size 1 for term babies AND size 0 for preterm babies) in service area or adjacent area |  |  |  |
| Nevirapine for baby                                                |  |  |  |  |                                                                               |                                                                                                                                                                   | Nevirapine for baby        |  |  |  |                                                                                                                       |  |  |  |
| Nevirapine for mother                                              |  |  |  |  |                                                                               |                                                                                                                                                                   | Nevirapine for mother      |  |  |  |                                                                                                                       |  |  |  |
| Omeprazole tablet or alternative such as pantoprazole, rabeprazole |  |  |  |  |                                                                               | Observed in pharmacy or in area where they are routinely stored, at least one with valid expiration date.                                                         |                            |  |  |  |                                                                                                                       |  |  |  |
| Oral rehydration solution                                          |  |  |  |  |                                                                               | Observed in pharmacy or in area where                                                                                                                             |                            |  |  |  |                                                                                                                       |  |  |  |

|                                          |                                          |  |  |  |                                            |                                                                                                                                                                                                                                                                                                                                                                  |             |  |  |  |                                   |  |  |  |
|------------------------------------------|------------------------------------------|--|--|--|--------------------------------------------|------------------------------------------------------------------------------------------------------------------------------------------------------------------------------------------------------------------------------------------------------------------------------------------------------------------------------------------------------------------|-------------|--|--|--|-----------------------------------|--|--|--|
|                                          |                                          |  |  |  |                                            | they are routinely stored, at least one with valid expiration date.                                                                                                                                                                                                                                                                                              |             |  |  |  |                                   |  |  |  |
| Partograph                               | Facility with blank partographs in stock |  |  |  | Observed availability of blank partographs | Blank partograph. Observed in service area.                                                                                                                                                                                                                                                                                                                      | Partographs |  |  |  | Blank partographs in service area |  |  |  |
| Safe final disposal of infectious wastes |                                          |  |  |  |                                            | Safe final disposal of infectious wastes includes incineration, open burning in protected area, dump without burning in protected area, or remove offsite with protected storage. If method is incineration, incinerator functioning and fuel available. Observed final disposal/holding site for infectious wastes and verify no unprotected waste is observed. |             |  |  |  |                                   |  |  |  |
| Safe final disposal of sharps            |                                          |  |  |  |                                            | Safe final disposal of sharps includes incineration, open burning in protected area, dump without burning in protected area, or remove offsite with protected storage. If method is incineration, incinerator functioning and fuel available. Observed final disposal/holdi                                                                                      |             |  |  |  |                                   |  |  |  |



|                                                |  |  |  |  |  |                                                                                                                                                                                                                                                                                                                            |                           |  |  |  |                                                |  |  |  |
|------------------------------------------------|--|--|--|--|--|----------------------------------------------------------------------------------------------------------------------------------------------------------------------------------------------------------------------------------------------------------------------------------------------------------------------------|---------------------------|--|--|--|------------------------------------------------|--|--|--|
|                                                |  |  |  |  |  | ng site for sharps and verify no unprotected sharps are observed.                                                                                                                                                                                                                                                          |                           |  |  |  |                                                |  |  |  |
| Salbutamol inhaler                             |  |  |  |  |  | Chronic asthma attacks. Observed in pharmacy or in area where they are routinely stored, at least one with valid expiration date.                                                                                                                                                                                          |                           |  |  |  |                                                |  |  |  |
| Scale                                          |  |  |  |  |  | Items observed and functioning in the main service area: Adult scale & child scale with weight gradation minimum 250 grams. A digital standing scale where adult holds child and gradations go to 250 grams is acceptable                                                                                                  | Infant and/or child scale |  |  |  | Infant weighing scale observed in service area |  |  |  |
| Sharps box/Appropriate storage of sharps waste |  |  |  |  |  | A puncture-resistant, rigid, leak resistant container designed to hold used sharps safely during collection, disposal and destruction. Sharps containers should be made of plastic, metal, or cardboard and have a lid that can be closed. Sharps containers should be fitted with a sharps aperture, capable of receiving |                           |  |  |  |                                                |  |  |  |

|                                                                                       |  |  |  |  |                                                                                                         |                                                                                                                                                                                                                                                                                                                                                                                    |                                |  |  |  |  |  |  |  |
|---------------------------------------------------------------------------------------|--|--|--|--|---------------------------------------------------------------------------------------------------------|------------------------------------------------------------------------------------------------------------------------------------------------------------------------------------------------------------------------------------------------------------------------------------------------------------------------------------------------------------------------------------|--------------------------------|--|--|--|--|--|--|--|
|                                                                                       |  |  |  |  |                                                                                                         | <p>syringes and needle assemblies of all standard sizes, together with other sharps. Boxes must be clearly marked with the international biohazard warning not less than 50mm diameter, printed in black or red on each of the front and back faces of the box.</p> <p>Observed availability in all three main service areas: general OPD, HIV testing area, and surgery area.</p> |                                |  |  |  |  |  |  |  |
| <p>Simvastatin tablet or other statin e.g. atorvastatin, pravastatin, fluvastatin</p> |  |  |  |  |                                                                                                         | <p>High cholesterol. Observed in pharmacy or in area where they are routinely stored, at least one with valid expiration date.</p>                                                                                                                                                                                                                                                 |                                |  |  |  |  |  |  |  |
| <p>Stainless steel bowl</p>                                                           |  |  |  |  |                                                                                                         |                                                                                                                                                                                                                                                                                                                                                                                    | <p>Stainless steel bowls</p>   |  |  |  |  |  |  |  |
| <p>Sterilisation equipment</p>                                                        |  |  |  |  | <p>Observed availability and reported functionality of either a dry heat sterilizer or an autoclave</p> | <p>This is usually either a dry heat sterilizer or an autoclave. If the machine is not electric, then make sure that the heat source is available and (If relevant) functioning (e.g., wood or gas is present for the autoclave). Observed availability anywhere in the facility</p>                                                                                               | <p>Sterilization equipment</p> |  |  |  |  |  |  |  |

|                                     |  |  |  |  |                                                                                                               |                                                                                                                                                                                                                                                               |               |  |  |  |                                                                                                                                                                            |  |  |  |
|-------------------------------------|--|--|--|--|---------------------------------------------------------------------------------------------------------------|---------------------------------------------------------------------------------------------------------------------------------------------------------------------------------------------------------------------------------------------------------------|---------------|--|--|--|----------------------------------------------------------------------------------------------------------------------------------------------------------------------------|--|--|--|
|                                     |  |  |  |  |                                                                                                               | reported functionality.                                                                                                                                                                                                                                       |               |  |  |  |                                                                                                                                                                            |  |  |  |
| Stethoscope                         |  |  |  |  |                                                                                                               | Items observed and functioning in the main service area: stethoscope                                                                                                                                                                                          | Stethoscope   |  |  |  |                                                                                                                                                                            |  |  |  |
| Suction apparatus                   |  |  |  |  | Observed availability and reported functionality of suction bulb or electric suction pump or suction catheter | Suction bulb (single use or sterilisable multi-use) or electric suction pump AND suction catheter for suctioning newborn. Observed availability, reported functionality, and in service area or adjacent area.                                                | Mucus suction |  |  |  | Observed to have suction bulb (single use or sterilisable multi-use) or electric suction pump AND suction catheter for suctioning newborn in service area or adjacent area |  |  |  |
| Surface disinfectant                |  |  |  |  |                                                                                                               | Chlorine-based or other country specific used for environmental disinfection                                                                                                                                                                                  |               |  |  |  |                                                                                                                                                                            |  |  |  |
| Syphilis rapid test                 |  |  |  |  |                                                                                                               | RDT kit. Able to conduct the test on-site (in the facility) and functioning equipment and reagents needed to conduct the test are observed on-site on the day of the survey. These may be in a laboratory or in the service area where the test is conducted. |               |  |  |  |                                                                                                                                                                            |  |  |  |
| Thermometer                         |  |  |  |  |                                                                                                               | Items observed and functioning in the main service area: thermometer                                                                                                                                                                                          | Thermometer   |  |  |  |                                                                                                                                                                            |  |  |  |
| Thiazide (e.g. hydrochlorothiazide) |  |  |  |  |                                                                                                               | Observed in pharmacy or in area where they are routinely                                                                                                                                                                                                      |               |  |  |  |                                                                                                                                                                            |  |  |  |

|                          |  |  |  |  |  |                                                                                                                                                                                                                                                                                                                |  |  |  |  |  |  |  |  |
|--------------------------|--|--|--|--|--|----------------------------------------------------------------------------------------------------------------------------------------------------------------------------------------------------------------------------------------------------------------------------------------------------------------|--|--|--|--|--|--|--|--|
|                          |  |  |  |  |  | stored, at least one with valid expiration date.                                                                                                                                                                                                                                                               |  |  |  |  |  |  |  |  |
| Urine glucose dipstick   |  |  |  |  |  | Dipsticks for urine glucose (with valid expiration date). Able to conduct the test on-site (in the facility) and functioning equipment and reagents needed to conduct the test are observed on-site on the day of the survey. These may be in a laboratory or in the service area where the test is conducted. |  |  |  |  |  |  |  |  |
| Urine protein dipstick   |  |  |  |  |  | Dipsticks for urine protein (with valid expiration date). Able to conduct the test on-site (in the facility) and functioning equipment and reagents needed to conduct the test are observed on-site on the day of the survey. These may be in a laboratory or in the service area where the test is conducted. |  |  |  |  |  |  |  |  |
| Urine test for pregnancy |  |  |  |  |  | RDT kit. Able to conduct the test on-site (in the facility) and functioning equipment and reagents needed to conduct the test are observed on-                                                                                                                                                                 |  |  |  |  |  |  |  |  |

|                                                     |  |                                                 |  |                                                                                                 |                                                                                                                                          |                                                                                                                                   |                                                  |  |  |  |                                                                                                 |                                                  |  |  |
|-----------------------------------------------------|--|-------------------------------------------------|--|-------------------------------------------------------------------------------------------------|------------------------------------------------------------------------------------------------------------------------------------------|-----------------------------------------------------------------------------------------------------------------------------------|--------------------------------------------------|--|--|--|-------------------------------------------------------------------------------------------------|--------------------------------------------------|--|--|
|                                                     |  |                                                 |  |                                                                                                 |                                                                                                                                          | site on the day of the survey. These may be in a laboratory or in the service area where the test is conducted.                   |                                                  |  |  |  |                                                                                                 |                                                  |  |  |
| Uterotonic                                          |  | Facility with oxytocin or ergometrine available |  |                                                                                                 | Observed availability of at least one valid unit of injectable uterotonic (oxytocin or other) in service area or where routinely stocked | Oxytocin. Observed in service area OR where routinely stored; in stock with at least one valid.                                   | Uterotonic                                       |  |  |  | Oxytocin. Observed in service area OR where routinely stored; in stock with at least one valid. | Oxytocin, Ergometrine, Misoprostol, Syntometrine |  |  |
| Vacuum aspirator or D&C kit                         |  |                                                 |  |                                                                                                 | Observed availability and reported functionality of a vacuum aspirator or D&C kit                                                        | Vacuum aspirator or D&C kit (with speculum). Observed availability, reported functionality, and in service area or adjacent area. |                                                  |  |  |  | Observed vacuum aspirator or D&C kit (with speculum) in service area or adjacent area           |                                                  |  |  |
| Zinc sulphate tablets, dispersible tablets or syrup |  |                                                 |  |                                                                                                 |                                                                                                                                          | Observed in pharmacy or in area where they are routinely stored, at least one with valid expiration date.                         |                                                  |  |  |  |                                                                                                 |                                                  |  |  |
| <b>Inputs: service availability</b>                 |  |                                                 |  |                                                                                                 |                                                                                                                                          |                                                                                                                                   |                                                  |  |  |  |                                                                                                 |                                                  |  |  |
| CEmOC: blood transfusion                            |  |                                                 |  | Reported performance of blood transfusion in the three months before the health facility survey |                                                                                                                                          |                                                                                                                                   |                                                  |  |  |  |                                                                                                 |                                                  |  |  |
| CEmOC: c-section                                    |  |                                                 |  | Reported performance of caesarean section in the three months before the health facility survey |                                                                                                                                          |                                                                                                                                   |                                                  |  |  |  |                                                                                                 |                                                  |  |  |
| EmOC: Administers antibiotic                        |  |                                                 |  | Reported performance of parenteral antibiotics in the three months                              |                                                                                                                                          | Parenteral administration of antibiotics for mothers                                                                              | Parenteral antibiotics provided in last 3 months |  |  |  | Facility offering parenteral administration of antibiotics for mothers                          |                                                  |  |  |

|                                                                                            |  |  |  |                                                                                                                   |  |                                                                                                                                                 |                                                                          |  |  |  |  |                                                                                                                                                |                                                       |  |
|--------------------------------------------------------------------------------------------|--|--|--|-------------------------------------------------------------------------------------------------------------------|--|-------------------------------------------------------------------------------------------------------------------------------------------------|--------------------------------------------------------------------------|--|--|--|--|------------------------------------------------------------------------------------------------------------------------------------------------|-------------------------------------------------------|--|
|                                                                                            |  |  |  | before the health facility survey                                                                                 |  |                                                                                                                                                 |                                                                          |  |  |  |  |                                                                                                                                                |                                                       |  |
| EmOC: Assisted/instrumental vaginal delivery                                               |  |  |  | Reported performance of assisted vaginal delivery in the three months before the health facility survey           |  | Assisted vaginal delivery                                                                                                                       |                                                                          |  |  |  |  | Facility offering assisted vaginal delivery                                                                                                    |                                                       |  |
| EmOC: Corticosteroids                                                                      |  |  |  |                                                                                                                   |  | Facility offers: Corticosteroids in preterm labour                                                                                              |                                                                          |  |  |  |  |                                                                                                                                                |                                                       |  |
| EmOC: Manual removal of placenta                                                           |  |  |  | Reported performance of manual removal of placenta in the three months before the health facility survey          |  | Facility offers: Manual removal of placenta                                                                                                     | Manual removal of placenta provided in last 3 months                     |  |  |  |  | Facility offering manual removal of placenta                                                                                                   |                                                       |  |
| EmOC: Manual removal of retained products                                                  |  |  |  | Reported performance of manual removal of retained products in the three months before the health facility survey |  | Facility offers: Manual removal of retained products                                                                                            | Removal of retained products of conception provided in the last 3 months |  |  |  |  | Facility offering manual removal of retained products                                                                                          |                                                       |  |
| EmOC: Parenteral administration of anticonvulsants for hypertensive disorders of pregnancy |  |  |  | Reported performance of parenteral anticonvulsants in the three months before the health facility survey          |  | Parenteral administration of anticonvulsants                                                                                                    | Parenteral anticonvulsants provided in the last 3 months                 |  |  |  |  |                                                                                                                                                |                                                       |  |
| EmOC: Parenteral uterotonic for haemorrhage                                                |  |  |  | Reported performance of parenteral uterotonics in the three months before the health facility survey              |  | Facility offers: Routine administration of oxytocin injection immediately after birth to all women for the prevention of postpartum haemorrhage | Uterotonic provided in the last 3 months                                 |  |  |  |  | Facility offers routine administration of oxytocin injection immediately after birth to all women for the prevention of postpartum haemorrhage |                                                       |  |
| Newborn signal function: baby weigh                                                        |  |  |  |                                                                                                                   |  |                                                                                                                                                 |                                                                          |  |  |  |  |                                                                                                                                                |                                                       |  |
| Newborn signal function: Breastfeeding                                                     |  |  |  |                                                                                                                   |  | Facility offers: Immediate and exclusive breastfeeding                                                                                          |                                                                          |  |  |  |  |                                                                                                                                                | Facility offering immediate and routine breastfeeding |  |

|                                                 |  |  |  |                                                                                                      |  |                                                                                                                                           |                                                                       |  |  |  |  |                                                     |                                                                                                                                                                   |  |
|-------------------------------------------------|--|--|--|------------------------------------------------------------------------------------------------------|--|-------------------------------------------------------------------------------------------------------------------------------------------|-----------------------------------------------------------------------|--|--|--|--|-----------------------------------------------------|-------------------------------------------------------------------------------------------------------------------------------------------------------------------|--|
| Newborn signal function: cord care              |  |  |  |                                                                                                      |  | Facility offers hygienic cord care: Cut with sterile item and apply disinfectant to tip and stump, and no application of other substances |                                                                       |  |  |  |  |                                                     | Service availability: facility offering hygienic cord care. Cut with sterile item and apply disinfectant to tip and stump, and no application of other substances |  |
| Newborn signal function: Drying and wrapping    |  |  |  |                                                                                                      |  | Facility offers: Thermal protection (drying baby immediately after birth and wrapping)                                                    |                                                                       |  |  |  |  |                                                     | Facility offers Thermal protection (drying baby immediately after birth and wrapping)                                                                             |  |
| Newborn signal function: KMC for LBW babies     |  |  |  |                                                                                                      |  | Facility offers: KMC (Kangaroo mother care) for premature/very small babies                                                               |                                                                       |  |  |  |  |                                                     | Facility offering KMC for LBW babies                                                                                                                              |  |
| Newborn signal function: Neonatal resuscitation |  |  |  | Reported performance of neonatal resuscitation in the three months before the health facility survey |  | Facility offers: Neonatal resuscitation with bag and mask                                                                                 | Newborn resuscitation with bag and mask provided in the last 3 months |  |  |  |  |                                                     | Facility offering neonatal resuscitation with bag and mask                                                                                                        |  |
| Newborn signal function: PROM                   |  |  |  |                                                                                                      |  | Facility offers: Antibiotics for preterm or prolonged PROM to prevent infection                                                           |                                                                       |  |  |  |  |                                                     |                                                                                                                                                                   |  |
| Newborn signal function: sepsis management      |  |  |  |                                                                                                      |  | Facility offers: Injectable antibiotics for neonatal sepsis                                                                               |                                                                       |  |  |  |  |                                                     |                                                                                                                                                                   |  |
| Newborn signal function: skin-to-skin           |  |  |  |                                                                                                      |  |                                                                                                                                           |                                                                       |  |  |  |  |                                                     |                                                                                                                                                                   |  |
| Newborn: BCG vaccine                            |  |  |  |                                                                                                      |  |                                                                                                                                           |                                                                       |  |  |  |  |                                                     |                                                                                                                                                                   |  |
| Newborn: polio vaccine                          |  |  |  |                                                                                                      |  |                                                                                                                                           |                                                                       |  |  |  |  |                                                     |                                                                                                                                                                   |  |
| Newborn: postnatal check                        |  |  |  |                                                                                                      |  |                                                                                                                                           |                                                                       |  |  |  |  |                                                     |                                                                                                                                                                   |  |
| Partograph                                      |  |  |  |                                                                                                      |  | Facility offers: Monitoring and management of labour                                                                                      |                                                                       |  |  |  |  | Facility offers monitoring and management of labour |                                                                                                                                                                   |  |

|                                                     |  |                                                                         |                                                                   |  |  |                  |                                                                          |  |  |                                                                                                                                   |                  |  |  |                                                                  |
|-----------------------------------------------------|--|-------------------------------------------------------------------------|-------------------------------------------------------------------|--|--|------------------|--------------------------------------------------------------------------|--|--|-----------------------------------------------------------------------------------------------------------------------------------|------------------|--|--|------------------------------------------------------------------|
|                                                     |  |                                                                         |                                                                   |  |  | using partograph |                                                                          |  |  |                                                                                                                                   | using partograph |  |  |                                                                  |
| Vitamin A                                           |  |                                                                         |                                                                   |  |  |                  |                                                                          |  |  |                                                                                                                                   |                  |  |  |                                                                  |
| <b>Intervention coverage</b>                        |  |                                                                         |                                                                   |  |  |                  |                                                                          |  |  |                                                                                                                                   |                  |  |  |                                                                  |
| Administer prophylaxis for eyes/apply eye ointment  |  |                                                                         |                                                                   |  |  |                  |                                                                          |  |  |                                                                                                                                   |                  |  |  | HCW report at last delivery: administer prophylaxis for the eyes |
| AMSTL: Active management of 3rd stage labour        |  |                                                                         |                                                                   |  |  |                  |                                                                          |  |  | SBA reported undertaking active management of third stage of labour at last birth attended                                        |                  |  |  |                                                                  |
| AMSTL: Administers uterotonic/Parenteral uterotonic |  | HCW reported giving an oxytocic agent during the last delivery attended |                                                                   |  |  |                  |                                                                          |  |  | SBA reported undertaking administration of prophylactic uterotonics to prevent post-partum haemorrhage during last birth attended |                  |  |  |                                                                  |
| AMSTL: Controlled cord traction                     |  |                                                                         |                                                                   |  |  |                  |                                                                          |  |  |                                                                                                                                   |                  |  |  |                                                                  |
| AMSTL: Prepares uterotonic                          |  |                                                                         |                                                                   |  |  |                  |                                                                          |  |  |                                                                                                                                   |                  |  |  |                                                                  |
| AMSTL: Uterine massage                              |  |                                                                         |                                                                   |  |  |                  |                                                                          |  |  |                                                                                                                                   |                  |  |  |                                                                  |
| Apgar score                                         |  |                                                                         |                                                                   |  |  |                  | Average of all deliveries recorded in the facility delivery Apgar score  |  |  |                                                                                                                                   |                  |  |  |                                                                  |
| Baby weighed                                        |  |                                                                         |                                                                   |  |  |                  | Average of all deliveries recorded in the facility delivery baby weighed |  |  |                                                                                                                                   |                  |  |  | HCW report at last delivery: weigh the baby                      |
| Breastfeeding                                       |  |                                                                         | Observation of breastfeeding initiation within 1 hour of delivery |  |  |                  | Average of all deliveries recorded in the facility delivery baby         |  |  |                                                                                                                                   |                  |  |  | HCW report at last delivery: initiate breastfeeding              |





|                                                                    |  |  |  |  |  |  |                                                                      |  |  |  |  |  |  |  |                                                                                                                                                                        |
|--------------------------------------------------------------------|--|--|--|--|--|--|----------------------------------------------------------------------|--|--|--|--|--|--|--|------------------------------------------------------------------------------------------------------------------------------------------------------------------------|
| EmNC: Neonatal resuscitation                                       |  |  |  |  |  |  |                                                                      |  |  |  |  |  |  |  | HCW report at last delivery: resuscitation open the airways, clean the mouth/use suction device, stimulating/drying/wrapping the baby, use the ambu bag, heart massage |
| EmOC: Assisted/instrumental vaginal delivery                       |  |  |  |  |  |  |                                                                      |  |  |  |  |  |  |  |                                                                                                                                                                        |
| EmOC: Blood transfusions                                           |  |  |  |  |  |  |                                                                      |  |  |  |  |  |  |  |                                                                                                                                                                        |
| EmOC: Caesarean sections                                           |  |  |  |  |  |  |                                                                      |  |  |  |  |  |  |  |                                                                                                                                                                        |
| EmOC: Manual removal of placenta                                   |  |  |  |  |  |  |                                                                      |  |  |  |  |  |  |  |                                                                                                                                                                        |
| EmOC: Manual removal of retained products                          |  |  |  |  |  |  |                                                                      |  |  |  |  |  |  |  |                                                                                                                                                                        |
| EmOC: Parenteral antibiotics or antibiotics for maternal infection |  |  |  |  |  |  |                                                                      |  |  |  |  |  |  |  |                                                                                                                                                                        |
| EmOC: Parenteral anticonvulsants                                   |  |  |  |  |  |  |                                                                      |  |  |  |  |  |  |  |                                                                                                                                                                        |
| EmOC: Parenteral oxytocin for haemorrhage                          |  |  |  |  |  |  |                                                                      |  |  |  |  |  |  |  |                                                                                                                                                                        |
| Examine perineal and vaginal lacerations                           |  |  |  |  |  |  |                                                                      |  |  |  |  |  |  |  |                                                                                                                                                                        |
| Examine placenta/assesses completeness of placenta and membranes   |  |  |  |  |  |  |                                                                      |  |  |  |  |  |  |  |                                                                                                                                                                        |
| HIV test                                                           |  |  |  |  |  |  | Average of all deliveries recorded in the facility delivery HIV test |  |  |  |  |  |  |  |                                                                                                                                                                        |
| Infection prevention/wash hands before examination                 |  |  |  |  |  |  |                                                                      |  |  |  |  |  |  |  |                                                                                                                                                                        |
| Iron folate tablets                                                |  |  |  |  |  |  |                                                                      |  |  |  |  |  |  |  |                                                                                                                                                                        |
| Palpitates uterus 15 min after delivery                            |  |  |  |  |  |  |                                                                      |  |  |  |  |  |  |  |                                                                                                                                                                        |
| Thermal care: Baby dried/wrapped                                   |  |  |  |  |  |  |                                                                      |  |  |  |  |  |  |  | HCW report at last delivery: Ensure the baby is dry                                                                                                                    |

|                                             |  |  |                                            |  |  |  |                                                                                     |  |  |  |  |  |                                                               |                                                       |
|---------------------------------------------|--|--|--------------------------------------------|--|--|--|-------------------------------------------------------------------------------------|--|--|--|--|--|---------------------------------------------------------------|-------------------------------------------------------|
| Thermal care: Baby kept dry/warm            |  |  |                                            |  |  |  |                                                                                     |  |  |  |  |  |                                                               | HCW report at last delivery: ensure baby is kept warm |
| Thermal care: Bathing delayed               |  |  |                                            |  |  |  |                                                                                     |  |  |  |  |  |                                                               |                                                       |
| Thermal care: Skin-to-skin                  |  |  | Observation of newborn placed skin-to-skin |  |  |  |                                                                                     |  |  |  |  |  |                                                               |                                                       |
| Wear sterile gloves for vaginal examination |  |  |                                            |  |  |  |                                                                                     |  |  |  |  |  |                                                               |                                                       |
| <b>Process quality-adjusted coverage</b>    |  |  |                                            |  |  |  |                                                                                     |  |  |  |  |  |                                                               |                                                       |
| <b>Quality: process</b>                     |  |  |                                            |  |  |  |                                                                                     |  |  |  |  |  |                                                               |                                                       |
| Asks about headaches, bleeding              |  |  |                                            |  |  |  |                                                                                     |  |  |  |  |  |                                                               |                                                       |
| Delivered on a clean floor/bed              |  |  |                                            |  |  |  |                                                                                     |  |  |  |  |  |                                                               |                                                       |
| Maternal blood pressure                     |  |  |                                            |  |  |  | Average of all deliveries recorded in the facility delivery maternal blood pressure |  |  |  |  |  | HCW report at last delivery: monitor maternal blood pressure  |                                                       |
| Maternal pulse                              |  |  |                                            |  |  |  |                                                                                     |  |  |  |  |  | HCW report at last delivery: monitor maternal pulse           |                                                       |
| Maternal temperature                        |  |  |                                            |  |  |  |                                                                                     |  |  |  |  |  | HCW report at last delivery: monitor maternal temperature     |                                                       |
| Monitor colour of amniotic fluid            |  |  |                                            |  |  |  |                                                                                     |  |  |  |  |  | HCW report at last delivery: Monitor colour of amniotic fluid |                                                       |
| Monitor degree of molding                   |  |  |                                            |  |  |  |                                                                                     |  |  |  |  |  | HCW report at last delivery: Monitor degree of molding        |                                                       |
| Monitor descent of head                     |  |  |                                            |  |  |  |                                                                                     |  |  |  |  |  | HCW report at last delivery: Monitor descent of the head      |                                                       |
| Monitor dilation of cervix                  |  |  |                                            |  |  |  |                                                                                     |  |  |  |  |  | HCW report at last delivery: Monitor dilation of the cervix   |                                                       |
| Monitor foetal heartbeat                    |  |  |                                            |  |  |  |                                                                                     |  |  |  |  |  | HCW report at last                                            |                                                       |



|                                   |  |  |  |  |  |  |  |                                                         |                                                                                                                       |  |  |  |  |  |
|-----------------------------------|--|--|--|--|--|--|--|---------------------------------------------------------|-----------------------------------------------------------------------------------------------------------------------|--|--|--|--|--|
| Support person at birth           |  |  |  |  |  |  |  |                                                         |                                                                                                                       |  |  |  |  |  |
| <b>User-adherence coverage</b>    |  |  |  |  |  |  |  |                                                         |                                                                                                                       |  |  |  |  |  |
|                                   |  |  |  |  |  |  |  |                                                         |                                                                                                                       |  |  |  |  |  |
| <b>Outcomes-adjusted coverage</b> |  |  |  |  |  |  |  |                                                         |                                                                                                                       |  |  |  |  |  |
| Death                             |  |  |  |  |  |  |  | Proportion of deliveries without complications or death | Proportion of live births reaching 28 days without death due to respiratory infection, nosocomial infection or sepsis |  |  |  |  |  |

TABLE NOTE: \* extraction based on SARA general service readiness indicators & specific availability & readiness indicators for basic obstetric and newborn care. Authors state used all 70 binary general and delivery-related SARA indicators; we identified 86 in extraction and not possible to determine which were used by the authors.





|                                                                       |                                         |  |                                   |  |  |  |  |  |                                                                                                                                                                    |  |
|-----------------------------------------------------------------------|-----------------------------------------|--|-----------------------------------|--|--|--|--|--|--------------------------------------------------------------------------------------------------------------------------------------------------------------------|--|
| Guidelines: essential newborn care                                    |                                         |  |                                   |  |  |  |  |  |                                                                                                                                                                    |  |
| Guidelines: Integrated Management of pregnancy and childbirth (IMPAC) |                                         |  |                                   |  |  |  |  |  | Integrated Management of Pregnancy and Childbirth (IMPAC) guidelines available in delivery area                                                                    |  |
| Guidelines: management of preterm labour                              |                                         |  |                                   |  |  |  |  |  | Guidelines for management of preterm labour available in delivery area                                                                                             |  |
| Guidelines: standard precaution                                       |                                         |  |                                   |  |  |  |  |  | Guidelines for standard precautions available in delivery area                                                                                                     |  |
| Provider knowledge/skills                                             |                                         |  |                                   |  |  |  |  |  |                                                                                                                                                                    |  |
| Supervision                                                           |                                         |  |                                   |  |  |  |  |  | At least half of interviewed providers reported being personally supervised at least once during the 6 months preceding the survey                                 |  |
| Training: AMTSL                                                       |                                         |  |                                   |  |  |  |  |  | At least one provider of delivery/newborn care in facility received training in AMTSL in the past 24 months                                                        |  |
| Training: CEmOC                                                       |                                         |  |                                   |  |  |  |  |  | At least one provider of delivery/newborn care in facility received training in IMPAC (presented as reported potentially author meant CEmOC) in the past 24 months |  |
| Training: surgery                                                     | ≥ 1 doctor conducting caesarean section |  |                                   |  |  |  |  |  |                                                                                                                                                                    |  |
| Training: clean cord care                                             |                                         |  |                                   |  |  |  |  |  | At least one provider of delivery/newborn care in facility received training in cord care in the past 24 months                                                    |  |
| Training: early and exclusive breastfeeding                           |                                         |  |                                   |  |  |  |  |  | At least one provider of delivery/newborn care in facility received training in early and exclusive breastfeeding in the past 24 months                            |  |
| Training: Integrated Management of                                    |                                         |  | Staff with any training on IMPACT |  |  |  |  |  | At least one provider of delivery/newborn                                                                                                                          |  |



|                                                                           |                                                                                                    |  |  |  |  |                              |  |  |                                                                                                                                                                       |  |
|---------------------------------------------------------------------------|----------------------------------------------------------------------------------------------------|--|--|--|--|------------------------------|--|--|-----------------------------------------------------------------------------------------------------------------------------------------------------------------------|--|
| pregnancy and childbirth (IMPAC)                                          |                                                                                                    |  |  |  |  |                              |  |  | care in facility received training in IMPAC in the past 24 months                                                                                                     |  |
| Training: KMC                                                             |                                                                                                    |  |  |  |  |                              |  |  | At least one provider of delivery/newborn care in facility received training in KMC in the past 24 months                                                             |  |
| Training: neonatal resuscitation                                          | ≥ 1 health professional trained in neonatal resuscitation                                          |  |  |  |  |                              |  |  | At least one provider of delivery/newborn care in facility received training in neonatal resuscitation in the past 24 months                                          |  |
| Training: newborn infection and management (incl. Injectable antibiotics) |                                                                                                    |  |  |  |  |                              |  |  | At least one provider of delivery/newborn care in facility received training in newborn infection management (including injectable antibiotics) in the past 24 months |  |
| Training: routine labour and delivery care                                |                                                                                                    |  |  |  |  | HCW trained in delivery care |  |  | At least one provider of delivery/newborn care in facility received training in routine care during labour and normal vaginal delivery in the past 24 months          |  |
| Training: thermal care                                                    |                                                                                                    |  |  |  |  |                              |  |  | At least one provider of delivery/newborn care in facility received training in thermal care in the past 24 months                                                    |  |
| Skilled birth attendant                                                   | Human resource capacity for 24 hour service availability: ≥3 skilled health professionals employed |  |  |  |  | 24-hour delivery care        |  |  | Provider of delivery care available on-site or on-call 24 hours/day, with observed duty schedule                                                                      |  |
| <b>Inputs: Supplies &amp; commodities</b>                                 |                                                                                                    |  |  |  |  |                              |  |  |                                                                                                                                                                       |  |
| Amlodipine tablet or alternative calcium channel blocker                  |                                                                                                    |  |  |  |  |                              |  |  |                                                                                                                                                                       |  |
| Amoxicillin syrup/suspension or dispersible tablet                        |                                                                                                    |  |  |  |  |                              |  |  |                                                                                                                                                                       |  |
| Amoxicillin tablet                                                        |                                                                                                    |  |  |  |  |                              |  |  |                                                                                                                                                                       |  |
| Ampicillin powder for injection                                           |                                                                                                    |  |  |  |  |                              |  |  |                                                                                                                                                                       |  |
| Antibiotic eye ointment                                                   |                                                                                                    |  |  |  |  |                              |  |  | Tetracycline eye ointment for                                                                                                                                         |  |

|                                                                                                                                                                         |                                        |  |                                |  |  |                       |  |  |                                                                                                                                                            |                                                                                                             |
|-------------------------------------------------------------------------------------------------------------------------------------------------------------------------|----------------------------------------|--|--------------------------------|--|--|-----------------------|--|--|------------------------------------------------------------------------------------------------------------------------------------------------------------|-------------------------------------------------------------------------------------------------------------|
|                                                                                                                                                                         |                                        |  |                                |  |  |                       |  |  | newborn available in delivery area and at least one dose valid.                                                                                            |                                                                                                             |
| Antibiotics for preterm                                                                                                                                                 |                                        |  |                                |  |  |                       |  |  |                                                                                                                                                            |                                                                                                             |
| Anticonvulsants                                                                                                                                                         | Observed Diazepam or Magnesium Sulfate |  |                                |  |  | Magnesium sulfate     |  |  | Magnesium sulphate available in delivery area with at least one dose valid.                                                                                | Essential drugs for management of complications in mothers and babies available: parenteral anticonvulsants |
| Storage of infectious waste                                                                                                                                             |                                        |  |                                |  |  |                       |  |  |                                                                                                                                                            |                                                                                                             |
| Aspirin cap/tab                                                                                                                                                         |                                        |  |                                |  |  |                       |  |  |                                                                                                                                                            |                                                                                                             |
| ATC for mother                                                                                                                                                          |                                        |  |                                |  |  |                       |  |  |                                                                                                                                                            |                                                                                                             |
| Beclometasone inhaler                                                                                                                                                   |                                        |  |                                |  |  |                       |  |  |                                                                                                                                                            |                                                                                                             |
| Beta blocker (e.g.bisoprolol, metoprolol, carvedilol, atenolol)                                                                                                         |                                        |  |                                |  |  |                       |  |  |                                                                                                                                                            |                                                                                                             |
| Blood glucose                                                                                                                                                           |                                        |  |                                |  |  |                       |  |  |                                                                                                                                                            |                                                                                                             |
| Blood pressure apparatus                                                                                                                                                | Reported sphygmomanometer available    |  | Manual or digital BP apparatus |  |  | Blood pressure cuff   |  |  | Manual or digital blood pressure apparatus observed and functioning in delivery area.                                                                      | Commodities to monitor and manage labour available on day of survey: blood pressure cuff                    |
| Carbamazepine tablet                                                                                                                                                    |                                        |  |                                |  |  |                       |  |  |                                                                                                                                                            |                                                                                                             |
| Ceftriaxone injection                                                                                                                                                   |                                        |  |                                |  |  |                       |  |  |                                                                                                                                                            |                                                                                                             |
| Chlorhexidine                                                                                                                                                           |                                        |  |                                |  |  |                       |  |  | Chlorhexidine solution (4%) for umbilical cord cleaning available in delivery area, with at least one dose valid.                                          |                                                                                                             |
| Clock/timer/watch                                                                                                                                                       | Observed clock                         |  |                                |  |  |                       |  |  |                                                                                                                                                            | Commodities to monitor and manage labour available on day of survey: timer                                  |
| Cloth to dry/wrap baby                                                                                                                                                  |                                        |  |                                |  |  | Towels                |  |  |                                                                                                                                                            |                                                                                                             |
| Corticosteroids                                                                                                                                                         | Observed Dexamethasone                 |  |                                |  |  |                       |  |  | Hydrocortisone observed at the facility and at least one dose valid.                                                                                       |                                                                                                             |
| Delivery pack OR all the following individual equipment: cord clamp, episiotomy scissors, scissors or blade to cut cord, suture material with needle, and needle holder |                                        |  |                                |  |  |                       |  |  | Delivery pack OR cord clamp, episiotomy scissors, scissors/blade to cut cord, suture material with need, AND needle holder all available in delivery area. |                                                                                                             |
| Delivery pack component: Cord clamps                                                                                                                                    |                                        |  |                                |  |  | Umbilical cord clamps |  |  |                                                                                                                                                            | Commodities for hygienic core care available on day of survey: cord tie                                     |

|                                                                                      |                                          |  |  |  |  |                                             |  |  |                                                                                                   |                                                                                         |
|--------------------------------------------------------------------------------------|------------------------------------------|--|--|--|--|---------------------------------------------|--|--|---------------------------------------------------------------------------------------------------|-----------------------------------------------------------------------------------------|
| Delivery pack component: Sterile scissors or new razor to cut cord                   |                                          |  |  |  |  | blade                                       |  |  |                                                                                                   | Commodities for hygienic core care available on day of survey: Sterile cord cutter      |
| Delivery pack component: Sterile syringes and needles                                | Observed small syringes/needs for babies |  |  |  |  |                                             |  |  |                                                                                                   |                                                                                         |
| Delivery pack component: Sutures                                                     |                                          |  |  |  |  |                                             |  |  |                                                                                                   |                                                                                         |
| Diazepam injection                                                                   |                                          |  |  |  |  |                                             |  |  |                                                                                                   |                                                                                         |
| Enalapril tablet or alternative ACE inhibitor e.g. lisinopril, ramipril, perindopril |                                          |  |  |  |  |                                             |  |  |                                                                                                   |                                                                                         |
| Foetal Stethoscope                                                                   | Observed fetoscope                       |  |  |  |  |                                             |  |  |                                                                                                   | Commodities to monitor and manage labour available on day of survey: foetal stethoscope |
| Fluoxetine tablet                                                                    |                                          |  |  |  |  |                                             |  |  |                                                                                                   |                                                                                         |
| Gauze                                                                                |                                          |  |  |  |  |                                             |  |  |                                                                                                   |                                                                                         |
| Gentamicin injection                                                                 |                                          |  |  |  |  |                                             |  |  |                                                                                                   |                                                                                         |
| Glibenclamide tablet                                                                 |                                          |  |  |  |  |                                             |  |  |                                                                                                   |                                                                                         |
| Gloves                                                                               |                                          |  |  |  |  |                                             |  |  | Disposable latex gloves observed in delivery area.                                                | Commodities for infection prevention available on day of survey: disposable gloves      |
| Haemoglobin test kit                                                                 |                                          |  |  |  |  |                                             |  |  |                                                                                                   |                                                                                         |
| Haloperidol tablet                                                                   |                                          |  |  |  |  |                                             |  |  |                                                                                                   |                                                                                         |
| Heat source move to infrastructure?                                                  |                                          |  |  |  |  | Heat source                                 |  |  |                                                                                                   |                                                                                         |
| HIV diagnostic capacity                                                              |                                          |  |  |  |  |                                             |  |  |                                                                                                   |                                                                                         |
| Hydralazine                                                                          |                                          |  |  |  |  |                                             |  |  |                                                                                                   |                                                                                         |
| Infection control measures in delivery room                                          |                                          |  |  |  |  | Infection control measures in delivery room |  |  |                                                                                                   |                                                                                         |
| Infection control: Disinfectant                                                      |                                          |  |  |  |  |                                             |  |  |                                                                                                   | Commodities for infection prevention available on day of survey: disinfectant           |
| Infection control: hand rub/disinfectant or delivery room has water and soap         | Observed sink with soap for hand washing |  |  |  |  |                                             |  |  | Hand-washing soap and running water or hand disinfectant available and observed in delivery area. | Commodities for infection prevention available on day of survey: soap                   |

|                                                                    |                                                                |  |              |  |  |                    |  |  |                                                                                                         |                                                                                                                                                   |
|--------------------------------------------------------------------|----------------------------------------------------------------|--|--------------|--|--|--------------------|--|--|---------------------------------------------------------------------------------------------------------|---------------------------------------------------------------------------------------------------------------------------------------------------|
| Infection control: Skin disinfectant                               |                                                                |  |              |  |  |                    |  |  | Skin disinfectant available for newborns in delivery area.                                              |                                                                                                                                                   |
| Infusion set and intravenous fluids                                | Reported availability of intravenous fluids with infusion sets |  |              |  |  |                    |  |  | IV solution with infusion set available in delivery area with at least one set valid.                   |                                                                                                                                                   |
| Injectable antibiotics                                             | Reported availability of ampicillin or gentamicin              |  |              |  |  |                    |  |  | Injectable antibiotics observed in delivery area (i.e., at "service site") and at least one dose valid. | Essential drugs for management of complications in mothers and babies available: parenteral antibiotics for maternal infection and newborn sepsis |
| Insulin regular injection                                          |                                                                |  |              |  |  |                    |  |  |                                                                                                         |                                                                                                                                                   |
| Malaria diagnostic capacity                                        |                                                                |  |              |  |  |                    |  |  |                                                                                                         |                                                                                                                                                   |
| Manual vacuum extractor                                            |                                                                |  |              |  |  |                    |  |  | Manual vacuum extractor available, observed, and functioning in the delivery area.                      |                                                                                                                                                   |
| Measuring cup                                                      | Observed graduated measuring cup                               |  |              |  |  |                    |  |  |                                                                                                         |                                                                                                                                                   |
| Metformin tablet                                                   |                                                                |  |              |  |  |                    |  |  |                                                                                                         |                                                                                                                                                   |
| Neonatal antibiotic                                                |                                                                |  |              |  |  |                    |  |  |                                                                                                         |                                                                                                                                                   |
| Neonatal bag & mask                                                | Observed bag + mask for baby                                   |  |              |  |  | Newborn bag & mask |  |  | Newborn bag and mask (AMBU bag and mask) available, observed, and functioning in the delivery area.     | Bag & mask available on day of survey                                                                                                             |
| Nevirapine for baby                                                |                                                                |  |              |  |  |                    |  |  |                                                                                                         |                                                                                                                                                   |
| Nevirapine for mother                                              |                                                                |  |              |  |  |                    |  |  |                                                                                                         |                                                                                                                                                   |
| Omeprazole tablet or alternative such as pantoprazole, rabeprazole |                                                                |  |              |  |  |                    |  |  |                                                                                                         |                                                                                                                                                   |
| Oral rehydration solution                                          |                                                                |  |              |  |  |                    |  |  |                                                                                                         |                                                                                                                                                   |
| Partograph                                                         | Observed correctly filled partograph                           |  |              |  |  | Partographs        |  |  | Partograph available, observed, and functioning in delivery area.                                       |                                                                                                                                                   |
| Safe final disposal of infectious wastes                           |                                                                |  |              |  |  |                    |  |  |                                                                                                         |                                                                                                                                                   |
| Safe final disposal of sharps                                      |                                                                |  |              |  |  |                    |  |  |                                                                                                         |                                                                                                                                                   |
| Salbutamol inhaler                                                 |                                                                |  |              |  |  |                    |  |  |                                                                                                         |                                                                                                                                                   |
| Scale                                                              | Reported weighing scale                                        |  | Infant scale |  |  |                    |  |  | Infant scale observed and functioning in delivery area.                                                 |                                                                                                                                                   |



|                                                     |                   |  |  |  |  |  |  |  |  |                                                                                                                                                                                       |                                                                                                                                                                                                           |
|-----------------------------------------------------|-------------------|--|--|--|--|--|--|--|--|---------------------------------------------------------------------------------------------------------------------------------------------------------------------------------------|-----------------------------------------------------------------------------------------------------------------------------------------------------------------------------------------------------------|
| Uterotonic                                          | Observed oxytocin |  |  |  |  |  |  |  |  | Oxytocin observed in delivery area with at least one dose valid.                                                                                                                      | Essential drugs for management of complications in mothers and babies available on day of survey: parenteral oxytocics for haemorrhage and uterotonics for active management of the third stage of labour |
| Vacuum aspirator or D&C kit                         |                   |  |  |  |  |  |  |  |  | Vacuum aspirator or D&C kit available, observed, and functioning, in the delivery area.                                                                                               |                                                                                                                                                                                                           |
| Zinc sulphate tablets, dispersible tablets or syrup |                   |  |  |  |  |  |  |  |  |                                                                                                                                                                                       |                                                                                                                                                                                                           |
| <b>Inputs: service availability</b>                 |                   |  |  |  |  |  |  |  |  |                                                                                                                                                                                       |                                                                                                                                                                                                           |
| CEmOC: blood transfusion                            |                   |  |  |  |  |  |  |  |  | Facility performed blood transfusion at least once during the three months before the assessment (incorporate the availability of equipment and materials for performing the service) |                                                                                                                                                                                                           |
| CEmOC: c-section                                    |                   |  |  |  |  |  |  |  |  | Facility performed caesarean section at least once during the three months before the assessment (incorporate the availability of equipment and materials for performing the service) |                                                                                                                                                                                                           |
| EmOC: Administers antibiotic                        |                   |  |  |  |  |  |  |  |  | Facility performed parenteral administration of antibiotics at least once during the three months before the assessment                                                               |                                                                                                                                                                                                           |
| EmOC: Assisted/instrumental vaginal delivery        |                   |  |  |  |  |  |  |  |  | Facility performed assisted vaginal delivery at least once during the three months before the assessment                                                                              |                                                                                                                                                                                                           |
| EmOC: Corticosteroids                               |                   |  |  |  |  |  |  |  |  |                                                                                                                                                                                       |                                                                                                                                                                                                           |
| EmOC: Manual removal of placenta                    |                   |  |  |  |  |  |  |  |  | Facility performed manual removal of placenta at least once during the three months before the assessment                                                                             |                                                                                                                                                                                                           |

|                                                                                            |  |                                                                         |  |  |  |  |  |  |                                                                                                                                                                     |  |
|--------------------------------------------------------------------------------------------|--|-------------------------------------------------------------------------|--|--|--|--|--|--|---------------------------------------------------------------------------------------------------------------------------------------------------------------------|--|
| EmOC: Manual removal of retained products                                                  |  |                                                                         |  |  |  |  |  |  | Facility performed removal of retained products at least once during the three months before the assessment                                                         |  |
| EmOC: Parenteral administration of anticonvulsants for hypertensive disorders of pregnancy |  |                                                                         |  |  |  |  |  |  | Facility performed parenteral administration of anticonvulsants for hypertensive disorders of pregnancy at least once during the three months before the assessment |  |
| EmOC: Parenteral uterotonic for haemorrhage                                                |  |                                                                         |  |  |  |  |  |  | Facility performed parenteral administration of uterotonic drugs/oxytocin at least once during the three months before the assessment                               |  |
| Newborn signal function: baby weigh                                                        |  | HCW report facility routinely weigh the newborn immediately             |  |  |  |  |  |  |                                                                                                                                                                     |  |
| Newborn signal function: Breastfeeding                                                     |  |                                                                         |  |  |  |  |  |  | Facility reported breast feeding in 1st hour is routinely practiced                                                                                                 |  |
| Newborn signal function: cord care                                                         |  |                                                                         |  |  |  |  |  |  |                                                                                                                                                                     |  |
| Newborn signal function: Drying and wrapping                                               |  | HCW report facility routinely dries and wraps newborn to keep them warm |  |  |  |  |  |  | Facility reported drying and wrapping newborns is routinely practiced                                                                                               |  |
| Newborn signal function: KMC for LBW babies                                                |  | HCW report facility practice kangaroo mother care                       |  |  |  |  |  |  |                                                                                                                                                                     |  |
| Newborn signal function: Neonatal resuscitation                                            |  |                                                                         |  |  |  |  |  |  | Facility performed neonatal resuscitation at least once during the three months before the assessment                                                               |  |
| Newborn signal function: PROM                                                              |  |                                                                         |  |  |  |  |  |  |                                                                                                                                                                     |  |
| Newborn signal function: sepsis management                                                 |  |                                                                         |  |  |  |  |  |  |                                                                                                                                                                     |  |
| Newborn signal function: skin-to-skin                                                      |  |                                                                         |  |  |  |  |  |  | Facility reported skin-to-skin is routinely practiced                                                                                                               |  |
| Newborn: BCG vaccine                                                                       |  | HCW report facility routinely gives newborn BCG prior to discharge      |  |  |  |  |  |  |                                                                                                                                                                     |  |











Table S5 Care of sick newborns

| Study (data sources)                      | Murphy et al. 2018 (38)<br>(HF assessment; medical records)                                                                                                                                                                                                                                                                                                                                                                                                                                                                                                                                                                                                                                                                                    |
|-------------------------------------------|------------------------------------------------------------------------------------------------------------------------------------------------------------------------------------------------------------------------------------------------------------------------------------------------------------------------------------------------------------------------------------------------------------------------------------------------------------------------------------------------------------------------------------------------------------------------------------------------------------------------------------------------------------------------------------------------------------------------------------------------|
| Health service                            | Inpatient neonatal care                                                                                                                                                                                                                                                                                                                                                                                                                                                                                                                                                                                                                                                                                                                        |
| <b>Target population</b>                  |                                                                                                                                                                                                                                                                                                                                                                                                                                                                                                                                                                                                                                                                                                                                                |
|                                           | Number of newborns requiring care; estimated by applying the rate of live births requiring inpatient services (183 per 1000 live births) to the total number of live births in the study region between mid-2014 to mid-2015                                                                                                                                                                                                                                                                                                                                                                                                                                                                                                                   |
| <b>Service contact</b>                    |                                                                                                                                                                                                                                                                                                                                                                                                                                                                                                                                                                                                                                                                                                                                                |
|                                           | Total number of neonatal admissions to INC facilities                                                                                                                                                                                                                                                                                                                                                                                                                                                                                                                                                                                                                                                                                          |
| <b>Input-adjusted coverage</b>            |                                                                                                                                                                                                                                                                                                                                                                                                                                                                                                                                                                                                                                                                                                                                                |
| <b>Inputs: service infrastructure</b>     |                                                                                                                                                                                                                                                                                                                                                                                                                                                                                                                                                                                                                                                                                                                                                |
| Power/Electricity                         | Consistent power (outages <monthly) or generator serving NBU                                                                                                                                                                                                                                                                                                                                                                                                                                                                                                                                                                                                                                                                                   |
| Heat source                               | Heating in NBU                                                                                                                                                                                                                                                                                                                                                                                                                                                                                                                                                                                                                                                                                                                                 |
| Water supply                              | Running water                                                                                                                                                                                                                                                                                                                                                                                                                                                                                                                                                                                                                                                                                                                                  |
| <b>Inputs: Supplies &amp; commodities</b> |                                                                                                                                                                                                                                                                                                                                                                                                                                                                                                                                                                                                                                                                                                                                                |
| Laboratory services                       | <ol style="list-style-type: none"> <li>1. Minimum package of care:               <ol style="list-style-type: none"> <li>i. Open 24/7</li> <li>ii. Test for haemoglobin</li> <li>iii. Test for bilirubin (blood test)</li> <li>iv. Glucose tests</li> <li>v. Blood grouping and cross match</li> <li>vi. Electrolytes (sodium / potassium)</li> </ol> </li> <li>2. Blood bank</li> <li>3. Blood slide microscopy for malaria parasites</li> <li>4. Test for direct Coombs test</li> <li>5. Urea or creatinine</li> <li>6. Liver function tests (enzymes e.g. AST/ALT)</li> <li>7. Microscopy &amp; culture: Pus swab and urine culture</li> <li>8. CSF microscopy</li> <li>9. Coagulation profile</li> <li>10. Blood culture ability</li> </ol> |
| Hygiene                                   | <ol style="list-style-type: none"> <li>1. Cleaning/disinfectant supplies</li> <li>2. Sharps disposed in a special container</li> <li>3. Clean gloves available</li> <li>4. Separate clinical and non-clinical waste</li> <li>5. Sinks with soap and water for hand-washing</li> <li>6. Mother has access to running water</li> <li>7. Alcohol hand rub</li> </ol>                                                                                                                                                                                                                                                                                                                                                                              |

|                                                     |                                                                                                                                                                                                                                                                                                                                                                                                                                                                                                                                                                                                                                                                                                                                                                                                                                                                                                                                                                                                                                                                                                                                                                                                                                                                                                                                                                                                                                                                                                                                                                                                                                                                                                                                                                |
|-----------------------------------------------------|----------------------------------------------------------------------------------------------------------------------------------------------------------------------------------------------------------------------------------------------------------------------------------------------------------------------------------------------------------------------------------------------------------------------------------------------------------------------------------------------------------------------------------------------------------------------------------------------------------------------------------------------------------------------------------------------------------------------------------------------------------------------------------------------------------------------------------------------------------------------------------------------------------------------------------------------------------------------------------------------------------------------------------------------------------------------------------------------------------------------------------------------------------------------------------------------------------------------------------------------------------------------------------------------------------------------------------------------------------------------------------------------------------------------------------------------------------------------------------------------------------------------------------------------------------------------------------------------------------------------------------------------------------------------------------------------------------------------------------------------------------------|
| <p>Safe delivery equipment and drugs for mother</p> | <p>Equipment available on the ward and working on the day of the visit</p> <ol style="list-style-type: none"> <li>1. Thermometer</li> <li>2. Sterile syringes</li> <li>3. Sterile needles</li> <li>4. Sterile vaginal examination packs</li> <li>5. Sterile delivery set (complete)</li> <li>6. A stethoscope</li> <li>7. Amnicots/sterile Kocker's forceps for artificial rupture of membrane</li> <li>8. Urine dipstick kits/strips</li> <li>9. Urinary catheters</li> <li>10. Vacuum (such as Kiwi) for assisted vaginal delivery</li> <li>11. Manual vacuum aspirator (MVA)</li> <li>12. Long gloves for manual removal of placenta</li> <li>13. Guedel airways – these should be a full range of sizes</li> <li>14. Bag Valve Mask (BVM) device: adult size bag and mask</li> <li>15. Oxygen source (any and working)</li> <li>16. Nasal catheters/prongs</li> <li>17. Oxygen face –masks (with and without reservoir bags)</li> <li>18. Oxygen flow regulators</li> <li>19. Laryngoscope</li> <li>20. Laryngoscope blades (straight, curved, and different sizes)</li> <li>21. Endotracheal tubes (of different sizes)</li> <li>22. IV fluid giving sets</li> <li>23. Blood giving set</li> <li>24. Adult IV cannula</li> <li>25. Blood pressure monitor (any and working)</li> </ol> <p>Drugs available on the ward or accessible within five minutes without administrative barriers</p> <ol style="list-style-type: none"> <li>1. Adrenaline</li> <li>2. Magnesium sulphate</li> <li>3. Lasix</li> <li>4. Digoxin</li> <li>5. Morphine</li> <li>6. Oxytocin</li> <li>7. Dexamethasone</li> <li>8. Prostaglandin F2 alpha</li> <li>9. Calcium gluconate</li> <li>10. Penicillin</li> <li>11. Gentamicin</li> <li>12. Ceftriaxone/Cefuroxime</li> </ol> |
| <p>Neonatal resuscitation equipment</p>             | <p>Available on the ward and working on the day of the visit</p> <ol style="list-style-type: none"> <li>1. Thermometer</li> <li>2. Weighing scales</li> <li>3. Sterile syringes</li> <li>4. Sterile needles</li> <li>5. Warm dry towels for drying and wrapping the newborn</li> <li>6. Sterile cord clamp</li> <li>7. Sterile scissors</li> <li>8. A firm stable surface for placing the newborn for resuscitation (where warmth can be maintained)</li> <li>9. An overhead light source above the surface for resuscitation</li> <li>10. A clock in view or reach of surface for resuscitation</li> <li>11. A stethoscope</li> <li>12. Suction tubes/catheters</li> <li>13. Suction Machine</li> <li>14. Guedel airways – these should be a full range of sizes</li> <li>15. Bag Valve Mask (BVM) devices: bag size 500 ml or 750 ml, that are in working order with newborn face masks (sizes 0 and 1)</li> <li>16. Oxygen source (any and working)</li> <li>17. Nasal catheters/prongs</li> <li>18. Oxygen face –masks (with and without reservoir bags)</li> <li>19. Oxygen flow regulators</li> <li>20. Warming equipment-working radiant heaters</li> </ol>                                                                                                                                                                                                                                                                                                                                                                                                                                                                                                                                                                                             |

|                                                                             |                                                                                                                                                                                                                                                                                                                                                                                                                                                                                                                                                                                                                                                                                                                                                                                                                                                                                                                                             |
|-----------------------------------------------------------------------------|---------------------------------------------------------------------------------------------------------------------------------------------------------------------------------------------------------------------------------------------------------------------------------------------------------------------------------------------------------------------------------------------------------------------------------------------------------------------------------------------------------------------------------------------------------------------------------------------------------------------------------------------------------------------------------------------------------------------------------------------------------------------------------------------------------------------------------------------------------------------------------------------------------------------------------------------|
| Essential ward equipment in the NBU for treatment and diagnostic procedures | <p>Available on the ward and working on the day of the visit</p> <ol style="list-style-type: none"> <li>1. Thermometer</li> <li>2. Weighing scales</li> <li>3. Sterile syringes</li> <li>4. Sterile needles</li> <li>5. A stethoscope</li> <li>6. Suction tubes/catheters</li> <li>7. Suction Machine</li> <li>8. Guedel airways – these should be a full range of sizes</li> <li>9. Bag Valve Mask (BVM) devices: bag size 500 ml or 750 ml, that are in working order with newborn face masks (sizes 0 and 1)</li> <li>10. Oxygen source (any and working)</li> <li>11. Nasal catheters/prongs</li> <li>12. Oxygen face –masks (with and without reservoir bags)</li> <li>13. Oxygen flow regulators</li> <li>14. Warming equipment-working radiant heaters</li> <li>15. Kangaroo mother care wraps</li> <li>16. Phototherapy equipment</li> <li>17. Eye protection for phototherapy</li> <li>18. Blood transfusion giving set</li> </ol> |
| IV fluid and feeds in the NBU                                               | <ol style="list-style-type: none"> <li>1. Feeding cups for giving expressed breast milk</li> <li>2. IV fluid burette</li> <li>3. Infusion set / adult IV fluid set</li> <li>4. Paediatric cannula</li> <li>5. Nasogastric tube (FG6 or 8 or other)</li> <li>6. glucose 10%</li> <li>7. normal saline IV or ringers lactate</li> <li>8. term formula</li> </ol>                                                                                                                                                                                                                                                                                                                                                                                                                                                                                                                                                                              |
| NBU drugs                                                                   | <p>Available if they were on the ward or accessible within five minutes without administrative barriers. * considered available if on the ward or available within the facility and within 2 hours of request</p> <ol style="list-style-type: none"> <li>1. Vitamin K</li> <li>2. Nevirapine solution</li> <li>3. Prophylactic tetracycline eye ointment*</li> <li>4. Phenobarbitone (injection)</li> <li>5. Phenytoin (injection) *</li> <li>6. Aminophylline*</li> <li>7. Penicillin (injection)</li> <li>8. Gentamicin or Amikacin</li> <li>9. Ampicillin / Cloxacillin (injection) *</li> <li>10. Oral Cloxacillin *</li> <li>11. Oral erythromycin*</li> <li>12. Metronidazole (injection) *</li> <li>13. Ceftriaxone or cefotaxime*</li> <li>14. Ferrous Fumarate suspension*</li> <li>15. Folate drops*</li> <li>16. Multivitamin syrup/drops*</li> <li>17. Intravenous (Anti-D) immunoglobulin (for rhesus disease) *</li> </ol>    |
| <b>Intervention coverage</b>                                                |                                                                                                                                                                                                                                                                                                                                                                                                                                                                                                                                                                                                                                                                                                                                                                                                                                                                                                                                             |
| Appropriate antibiotic prescription                                         | Dose of gentamicin and/or penicillin as per national guidelines, allowing for $\pm 20\%$ margin of error                                                                                                                                                                                                                                                                                                                                                                                                                                                                                                                                                                                                                                                                                                                                                                                                                                    |
| Correct oxygen prescription                                                 | Correct route and prescribed to patients requiring oxygen treatment as per recorded signs and symptoms                                                                                                                                                                                                                                                                                                                                                                                                                                                                                                                                                                                                                                                                                                                                                                                                                                      |
| Correct fluids and feeds volume                                             | As per national guidelines, allowing for $\pm 20\%$ margin of error                                                                                                                                                                                                                                                                                                                                                                                                                                                                                                                                                                                                                                                                                                                                                                                                                                                                         |
| <b>Process quality-adjusted coverage</b>                                    |                                                                                                                                                                                                                                                                                                                                                                                                                                                                                                                                                                                                                                                                                                                                                                                                                                                                                                                                             |
| <b>Quality: process of care</b>                                             |                                                                                                                                                                                                                                                                                                                                                                                                                                                                                                                                                                                                                                                                                                                                                                                                                                                                                                                                             |
| Documentation of newborn characteristics                                    | Document 9 characteristics: age, sex, mode of delivery, weight, gestational age, Apgar score at 5 min, HIV status, diagnosis, outcome                                                                                                                                                                                                                                                                                                                                                                                                                                                                                                                                                                                                                                                                                                                                                                                                       |

|                                         |                                                                                                                                                                                                                                                                                                                                                                                   |
|-----------------------------------------|-----------------------------------------------------------------------------------------------------------------------------------------------------------------------------------------------------------------------------------------------------------------------------------------------------------------------------------------------------------------------------------|
| Documentation of signs and symptoms     | Signs (evaluation on admission): Temperature, bulging fontanelle, can suck or breastfeed, reduced mobility or floppy, respiratory rate, in drawing, grunting, central cyanosis<br>Symptoms (history): Prolonged rupture of membranes (ROM) (>18 h), fever, difficulty breathing, severe vomiting, difficulty feeding or breastfeeding, convulsions, partial or focal fits, apnoea |
| Evidence of monitoring                  | Treatment sheet available and filled, vital signs chart available and filled, evidence of weight monitoring                                                                                                                                                                                                                                                                       |
| <b>Quality: interpersonal</b>           |                                                                                                                                                                                                                                                                                                                                                                                   |
|                                         |                                                                                                                                                                                                                                                                                                                                                                                   |
| <b>User-adherence adjusted coverage</b> |                                                                                                                                                                                                                                                                                                                                                                                   |
|                                         |                                                                                                                                                                                                                                                                                                                                                                                   |
| <b>Outcomes-adjusted coverage</b>       |                                                                                                                                                                                                                                                                                                                                                                                   |
|                                         |                                                                                                                                                                                                                                                                                                                                                                                   |

Table S6 Exclusive breastfeeding

| Study<br>(data sources)                  | Nguhiu et al. 2017 (40)<br>(DHS)                                                                        |
|------------------------------------------|---------------------------------------------------------------------------------------------------------|
| Intervention                             | Exclusive Breastfeeding                                                                                 |
| <b>Target population</b>                 |                                                                                                         |
| Children                                 | Children 0-5 mnths                                                                                      |
| <b>Service contact</b>                   |                                                                                                         |
| Breastfed                                | Breastfed in last 24 hours                                                                              |
| <b>Input-adjusted coverage</b>           |                                                                                                         |
|                                          |                                                                                                         |
| <b>Intervention coverage</b>             |                                                                                                         |
|                                          |                                                                                                         |
| <b>Process quality-adjusted coverage</b> |                                                                                                         |
|                                          |                                                                                                         |
| <b>User-adherence adjusted coverage</b>  |                                                                                                         |
| Adherence to guidelines                  | Respondent reported exclusively breastfeeding in preceding 24 h AND no other complementary feed offered |
| <b>Outcome-adjusted coverage</b>         |                                                                                                         |
|                                          |                                                                                                         |





|                                                            |  |                                           |  |                                                                                 |                               |                                                |                                                                                                          |                                               |                                                                 |                                                                   |
|------------------------------------------------------------|--|-------------------------------------------|--|---------------------------------------------------------------------------------|-------------------------------|------------------------------------------------|----------------------------------------------------------------------------------------------------------|-----------------------------------------------|-----------------------------------------------------------------|-------------------------------------------------------------------|
| Scale                                                      |  |                                           |  |                                                                                 |                               | Infant weighing scale observed in service area |                                                                                                          |                                               |                                                                 |                                                                   |
| Stethoscope                                                |  |                                           |  |                                                                                 |                               | Stethoscope                                    |                                                                                                          |                                               |                                                                 |                                                                   |
| Thermometer                                                |  |                                           |  |                                                                                 |                               | Thermometer                                    |                                                                                                          |                                               |                                                                 |                                                                   |
| <b>Inputs: service availability</b>                        |  |                                           |  |                                                                                 |                               |                                                |                                                                                                          |                                               |                                                                 |                                                                   |
| ARVs                                                       |  |                                           |  |                                                                                 |                               | ARV to mother<br>ARV to infant                 |                                                                                                          |                                               |                                                                 |                                                                   |
| Counselling: Breastfeeding                                 |  |                                           |  |                                                                                 |                               | Breastfeeding counselling                      |                                                                                                          |                                               |                                                                 |                                                                   |
| Counselling: HIV prevention                                |  |                                           |  |                                                                                 |                               | HIV preventive counselling                     |                                                                                                          |                                               |                                                                 |                                                                   |
| Counselling: HIV test                                      |  |                                           |  |                                                                                 |                               | HIV test counselling                           |                                                                                                          |                                               |                                                                 |                                                                   |
| Counselling: ITNs                                          |  |                                           |  |                                                                                 |                               | Counselling on ITNs                            |                                                                                                          |                                               |                                                                 |                                                                   |
| Counselling: newborn care                                  |  |                                           |  |                                                                                 |                               | Newborn cares counselling                      |                                                                                                          |                                               |                                                                 |                                                                   |
| HIV test                                                   |  |                                           |  |                                                                                 |                               | HIV test                                       |                                                                                                          |                                               |                                                                 |                                                                   |
| Inpatient                                                  |  |                                           |  |                                                                                 |                               | Inpatient                                      |                                                                                                          |                                               |                                                                 |                                                                   |
| Counselling: family planning                               |  |                                           |  |                                                                                 |                               | FP counselling                                 |                                                                                                          |                                               |                                                                 |                                                                   |
| <b>Intervention coverage</b>                               |  |                                           |  |                                                                                 |                               |                                                |                                                                                                          |                                               |                                                                 |                                                                   |
| Anaemia                                                    |  |                                           |  |                                                                                 |                               |                                                |                                                                                                          | Women report anaemia checked                  | Haemoglobin assessment                                          |                                                                   |
| Baby weighed                                               |  | Women reported newborn weighed at birth   |  |                                                                                 | Women reported weight checked |                                                |                                                                                                          |                                               |                                                                 |                                                                   |
| Family planning                                            |  |                                           |  |                                                                                 |                               |                                                | Family planning method                                                                                   |                                               |                                                                 |                                                                   |
| Immunisation: BCG vaccination                              |  | Women reported BCG vaccination            |  |                                                                                 |                               |                                                |                                                                                                          | Women reported BCG immunisation given         | BCG immunisation                                                | Received necessary immunisations                                  |
| Immunisation: Hepatitis B                                  |  |                                           |  |                                                                                 |                               |                                                |                                                                                                          | Women reported Hepatitis B immunisation given |                                                                 |                                                                   |
| Immunisation: Oral polio vaccine                           |  | Women reported polio vaccination at birth |  |                                                                                 |                               |                                                |                                                                                                          |                                               | Oral polio vaccine                                              |                                                                   |
| Iron folate tablets                                        |  |                                           |  |                                                                                 |                               |                                                | Iron tablets                                                                                             | Women reported iron folate tablets prescribed |                                                                 |                                                                   |
| Vitamin A given to mother                                  |  |                                           |  |                                                                                 |                               |                                                | Vitamin A capsules                                                                                       | Women report Vitamin A tablets prescribed     | Vitamin A supplement                                            |                                                                   |
| Vitamin B given to mother                                  |  |                                           |  |                                                                                 |                               |                                                |                                                                                                          | Women report Vitamin B tablets prescribed     |                                                                 |                                                                   |
| <b>Process quality-adjusted coverage</b>                   |  |                                           |  |                                                                                 |                               |                                                |                                                                                                          |                                               |                                                                 |                                                                   |
| <b>Quality: process</b>                                    |  |                                           |  |                                                                                 |                               |                                                |                                                                                                          |                                               |                                                                 |                                                                   |
| Breastfeeding checked                                      |  |                                           |  |                                                                                 |                               |                                                | Other assessments (breastfeeding, child's weight/growth, etc.)                                           | Women report breastfeeding checked            | Breastfeeding problem check<br>Breastfeeding difficulties check |                                                                   |
| Counselled on breastfeeding, thermal care and danger signs |  |                                           |  | Women reported being counselled on breastfeeding, thermal care and danger signs |                               |                                                | Advice on preventive PNC (keeping baby warm, cord, breastfeeding, FP, postpartum hygiene, ITN)           |                                               |                                                                 | Learnt about post-delivery complications among women and children |
| Counselled on danger signs, nutrition and family planning  |  |                                           |  | Women reported being counselled on danger signs, nutrition, and family planning |                               |                                                | Advice to seek care if child has any danger sign (fever, cold, difficulty to breastfeed, rapid/difficult | Women reported family planning counselling    |                                                                 | Learnt about nutrition, anaemia and breast feeding                |





|                                                    |                                                                                            |  |  |  |                                                                                       |  |  |  |  |                                                                                                      |  |  |                                                                                                |  |
|----------------------------------------------------|--------------------------------------------------------------------------------------------|--|--|--|---------------------------------------------------------------------------------------|--|--|--|--|------------------------------------------------------------------------------------------------------|--|--|------------------------------------------------------------------------------------------------|--|
| Water supply                                       |                                                                                            |  |  |  | Functional water source and soap available in the consultation room                   |  |  |  |  |                                                                                                      |  |  |                                                                                                |  |
| <b>Inputs: Staffing, training &amp; guidelines</b> |                                                                                            |  |  |  |                                                                                       |  |  |  |  |                                                                                                      |  |  |                                                                                                |  |
| Qualified HCW                                      |                                                                                            |  |  |  | Observed cases attended by a qualified HCW                                            |  |  |  |  |                                                                                                      |  |  |                                                                                                |  |
| IMCI guidelines                                    | Guidelines (IMCI guidelines or relevant guidelines or job aid available)                   |  |  |  |                                                                                       |  |  |  |  | IMCI guidelines observed in service area                                                             |  |  | IMCI guideline: national guidelines for IMCI, IMCI chart booklet, IMCI card, other visual aids |  |
| HCW Knowledge: breathing difficulties              | Average performance on case scenarios                                                      |  |  |  | Vignette-based scenario: Breathing difficulties in a 1-year-old with simple pneumonia |  |  |  |  |                                                                                                      |  |  |                                                                                                |  |
| HCW knowledge: severe dehydration                  |                                                                                            |  |  |  | Vignette-based scenario: Viral illness with severe dehydration in a 2-year-old        |  |  |  |  |                                                                                                      |  |  |                                                                                                |  |
| HCW knowledge: lethargy                            |                                                                                            |  |  |  | Vignette-based scenario: Lethargic 1-month-old                                        |  |  |  |  |                                                                                                      |  |  |                                                                                                |  |
| Supervision                                        | Supervision (received supervision visit with case management observation in past 3 months) |  |  |  |                                                                                       |  |  |  |  | Supervised with observation                                                                          |  |  |                                                                                                |  |
| Trained ARI                                        |                                                                                            |  |  |  |                                                                                       |  |  |  |  | Trained on ARI diagnosis and management                                                              |  |  |                                                                                                |  |
| Trained diarrhoea management                       |                                                                                            |  |  |  |                                                                                       |  |  |  |  | Trained on diarrhoea management                                                                      |  |  |                                                                                                |  |
| Trained iCCM                                       |                                                                                            |  |  |  |                                                                                       |  |  |  |  | Trained on iCCM (CHWs)                                                                               |  |  |                                                                                                |  |
| Trained IMCI                                       | Training (at least one staff member with IMCI or relevant training)                        |  |  |  | Observed cases attended by a HCW trained in IMCI                                      |  |  |  |  | At least one staff member providing the service trained in some aspect of IMCI in the last two years |  |  | Staff with any training on IMCI Guidelines                                                     |  |

|                                               |                                                                        |  |  |  |                                                                       |  |  |  |  |                                                                                                                                                              |  |  |                                  |  |
|-----------------------------------------------|------------------------------------------------------------------------|--|--|--|-----------------------------------------------------------------------|--|--|--|--|--------------------------------------------------------------------------------------------------------------------------------------------------------------|--|--|----------------------------------|--|
| Trained malaria diagnosis & management        |                                                                        |  |  |  |                                                                       |  |  |  |  | Trained on malaria diagnosis and management                                                                                                                  |  |  |                                  |  |
| Trained nutrition                             |                                                                        |  |  |  |                                                                       |  |  |  |  | Trained on nutritional assessment                                                                                                                            |  |  |                                  |  |
| Trained paediatric HIV diagnosis & management |                                                                        |  |  |  |                                                                       |  |  |  |  | Trained on paediatric HIV diagnosis and management                                                                                                           |  |  |                                  |  |
| <b>Inputs: Supplies &amp; commodities</b>     |                                                                        |  |  |  |                                                                       |  |  |  |  |                                                                                                                                                              |  |  |                                  |  |
| ACT                                           | Basic medicine: Artemisinin combination therapy (ACT)                  |  |  |  |                                                                       |  |  |  |  | Artemisinin combination therapy (ACT) any child dosage or formulation. Observed in service area OR where routinely stored; in stock with at least one valid. |  |  |                                  |  |
| Anthelmintic                                  |                                                                        |  |  |  |                                                                       |  |  |  |  |                                                                                                                                                              |  |  | Albendazole/ mebendazole         |  |
| Antibiotic                                    | Basic medicine: Oral antibiotic                                        |  |  |  | Antibiotics in stock; ceftriaxone in stock                            |  |  |  |  | Cotrimoxazole or amoxicillin any child dosage or formulation. Observed in service area OR where routinely stored; in stock with at least one valid.          |  |  |                                  |  |
| Clock/timer                                   |                                                                        |  |  |  |                                                                       |  |  |  |  | Timer                                                                                                                                                        |  |  |                                  |  |
| Haemoglobin                                   |                                                                        |  |  |  |                                                                       |  |  |  |  |                                                                                                                                                              |  |  | Diagnostic capacity: Haemoglobin |  |
| Injectable antibiotics                        | Severe/complicated illness medicines: Injectable antibiotics           |  |  |  |                                                                       |  |  |  |  | Injectable antibiotics                                                                                                                                       |  |  |                                  |  |
| Injectable antimalarials                      | Severe/complicated illness medicines: Injectable quinine or artesunate |  |  |  |                                                                       |  |  |  |  | Injectable antimalarials                                                                                                                                     |  |  |                                  |  |
| Iron                                          |                                                                        |  |  |  |                                                                       |  |  |  |  |                                                                                                                                                              |  |  | Iron tablet                      |  |
| IV fluids                                     | Severe/complicated illness medicines: IV fluids                        |  |  |  | Dextrose solutions or dextrose containing intravenous fluids in stock |  |  |  |  |                                                                                                                                                              |  |  |                                  |  |
| Microscopy supplies                           | Diagnostics: General microscopy                                        |  |  |  |                                                                       |  |  |  |  | Microscopy supplies                                                                                                                                          |  |  |                                  |  |

|             |                                                                                    |  |  |  |                                                                  |  |  |  |  |                                                                                                                                                                                                                                                                                                                                                                   |                                                              |  |                  |  |
|-------------|------------------------------------------------------------------------------------|--|--|--|------------------------------------------------------------------|--|--|--|--|-------------------------------------------------------------------------------------------------------------------------------------------------------------------------------------------------------------------------------------------------------------------------------------------------------------------------------------------------------------------|--------------------------------------------------------------|--|------------------|--|
|             | (functioning microscope and slides)                                                |  |  |  |                                                                  |  |  |  |  |                                                                                                                                                                                                                                                                                                                                                                   |                                                              |  |                  |  |
| ORS         | Basic medicine: Oral rehydration solution                                          |  |  |  | Isotonic fluid or Oral rehydration solution and nasogastric tube |  |  |  |  | Oral Rehydration Salts (ORS) sachets any child dosage or formulation. Observed in service area OR where routinely stored; in stock with at least one valid.                                                                                                                                                                                                       |                                                              |  | ORS              |  |
| Paracetamol |                                                                                    |  |  |  | Paracetamol suppository in stock                                 |  |  |  |  |                                                                                                                                                                                                                                                                                                                                                                   |                                                              |  |                  |  |
| RDT         | Diagnostics: Malaria Diagnostic (RDTs or microscopy)                               |  |  |  | Diagnostic: Malaria testing supplies in stock                    |  |  |  |  | Malaria rapid test or smear (microscope, slides, and stain). Able to conduct the test on-site (in the facility) and functioning equipment and reagents needed to conduct the test are observed on-site on the day of the survey. In area where tests for child health are carried out or anywhere in the facility where laboratory testing is routinely conducted |                                                              |  |                  |  |
| Scale       | Diagnostics: Malnutrition Diagnostic (MUAC or Scale + Height board + Growth chart) |  |  |  | Functional scale available                                       |  |  |  |  | Child and infant scale. Weight gradations at minimum 250 grams and 100 grams. Observed availability, reported functionality, and in service area or adjacent area.                                                                                                                                                                                                | Observed availability of at least one working weighing scale |  | Scale (observed) |  |
| Stethoscope | Diagnostics: ARI Diagnostic (stethoscope)                                          |  |  |  |                                                                  |  |  |  |  | Stethoscope. Observed availability, reported                                                                                                                                                                                                                                                                                                                      |                                                              |  |                  |  |





|                                                    |  |                                                |                                                                                                                                               |                                                                     |                                                                                    |                                                                |  |  |                                                                                                      |  |                                                                       |  |  |                                 |
|----------------------------------------------------|--|------------------------------------------------|-----------------------------------------------------------------------------------------------------------------------------------------------|---------------------------------------------------------------------|------------------------------------------------------------------------------------|----------------------------------------------------------------|--|--|------------------------------------------------------------------------------------------------------|--|-----------------------------------------------------------------------|--|--|---------------------------------|
|                                                    |  | received antibiotic pills, syrup or injections |                                                                                                                                               |                                                                     |                                                                                    |                                                                |  |  |                                                                                                      |  |                                                                       |  |  |                                 |
| Antimalarial                                       |  |                                                |                                                                                                                                               |                                                                     |                                                                                    |                                                                |  |  | Mother reported child took Artemisinin-based combination therapy (ACT) if the blood test is positive |  |                                                                       |  |  | Child received an anti-malarial |
| Deworming medication                               |  |                                                |                                                                                                                                               |                                                                     |                                                                                    | Children 2-59mths: deworming medication                        |  |  |                                                                                                      |  |                                                                       |  |  |                                 |
| Malaria test                                       |  |                                                |                                                                                                                                               | Mother reported blood taken from child's finger or heel for testing |                                                                                    |                                                                |  |  | Mother reported child received diagnostic blood test (either microscopy or RDT)                      |  |                                                                       |  |  |                                 |
| ORT                                                |  |                                                | Mother reported child received oral rehydration therapy (from oral rehydration salts (ORS), pre-packaged ORS liquid or other homemade fluids) |                                                                     |                                                                                    |                                                                |  |  |                                                                                                      |  |                                                                       |  |  |                                 |
| Vitamin A dosage                                   |  |                                                |                                                                                                                                               |                                                                     |                                                                                    | All children: Vitamin A dosage                                 |  |  |                                                                                                      |  |                                                                       |  |  |                                 |
| <b>Process quality-adjusted coverage</b>           |  |                                                |                                                                                                                                               |                                                                     |                                                                                    |                                                                |  |  |                                                                                                      |  |                                                                       |  |  |                                 |
| <b>Quality: process of care</b>                    |  |                                                |                                                                                                                                               |                                                                     |                                                                                    |                                                                |  |  |                                                                                                      |  |                                                                       |  |  |                                 |
| Check Convulsions                                  |  |                                                |                                                                                                                                               |                                                                     |                                                                                    | All children: history taking convulsions                       |  |  |                                                                                                      |  |                                                                       |  |  |                                 |
| Check danger signs                                 |  |                                                |                                                                                                                                               |                                                                     | Provider observed to ask for at least two general danger signs per IMCI guidelines |                                                                |  |  |                                                                                                      |  | Observed checked for 3 danger signs                                   |  |  |                                 |
| Check diarrhoea                                    |  |                                                |                                                                                                                                               |                                                                     | Provider observed to ask for presence of diarrhoea                                 |                                                                |  |  |                                                                                                      |  |                                                                       |  |  |                                 |
| Check edema of feet                                |  |                                                |                                                                                                                                               |                                                                     |                                                                                    | Children 2-59mths: edema of feet                               |  |  |                                                                                                      |  |                                                                       |  |  |                                 |
| Check Fever, cough/difficulty breathing, diarrhoea |  |                                                |                                                                                                                                               |                                                                     | Provider observed to ask for presence of fever<br>Provider                         | Children 2-59mths: history taking cough or difficult breathing |  |  |                                                                                                      |  | Observed checked for fever, cough/difficulty breathing, and diarrhoea |  |  |                                 |

|                                                     |  |  |  |  |                                                                       |                                                                                                                   |  |  |  |  |                                                    |                                                                    |  |  |
|-----------------------------------------------------|--|--|--|--|-----------------------------------------------------------------------|-------------------------------------------------------------------------------------------------------------------|--|--|--|--|----------------------------------------------------|--------------------------------------------------------------------|--|--|
|                                                     |  |  |  |  | observed to ask for presence of cough                                 | All children: history taking diarrhoea and blood in stool (dysentery)<br>Children 2-59mnths: history taking fever |  |  |  |  |                                                    |                                                                    |  |  |
| Check health card                                   |  |  |  |  |                                                                       |                                                                                                                   |  |  |  |  | Observed checked health card                       |                                                                    |  |  |
| Check immunisations                                 |  |  |  |  | Provider observed to check child's current vaccination status         | All children: checked immunisation card or immunised                                                              |  |  |  |  |                                                    | Observed or HCW reported routine assessment of immunisation status |  |  |
| Check mouth (thrush in IMCI)                        |  |  |  |  |                                                                       | Children <2mnths: mouth (thrush IMCI)                                                                             |  |  |  |  |                                                    |                                                                    |  |  |
| Check pallor                                        |  |  |  |  | Provider observed to check for signs of anaemia (conjunctivae, palms) | Children 2-59mnths: pallor                                                                                        |  |  |  |  | Observed checked for palmar or conjunctival pallor |                                                                    |  |  |
| Check Vomiting                                      |  |  |  |  |                                                                       | Children 2-59mnths: history taking vomiting                                                                       |  |  |  |  |                                                    |                                                                    |  |  |
| Check: Ear problems                                 |  |  |  |  | Provider observed to ask for presence of ear problems                 | Children 2-59mnths: history taking ear problems                                                                   |  |  |  |  |                                                    |                                                                    |  |  |
| Check: Inability to drink                           |  |  |  |  |                                                                       | All children: history taking inability to drink anything                                                          |  |  |  |  |                                                    |                                                                    |  |  |
| Check: Maternal HIV status                          |  |  |  |  |                                                                       | All children: history taking Maternal HIV status                                                                  |  |  |  |  |                                                    |                                                                    |  |  |
| Check: Normal feeding                               |  |  |  |  |                                                                       | Children <2mnths: history taking normal feeding pattern                                                           |  |  |  |  |                                                    |                                                                    |  |  |
| Check: Sick feeding                                 |  |  |  |  |                                                                       | Children <2mnths: history taking sick feeding pattern                                                             |  |  |  |  |                                                    |                                                                    |  |  |
| Described danger signs requiring return to facility |  |  |  |  |                                                                       | All children: Described danger signs requiring return to facility                                                 |  |  |  |  |                                                    |                                                                    |  |  |
| Directions for feeding                              |  |  |  |  |                                                                       | All children: Directions for feeding                                                                              |  |  |  |  |                                                    |                                                                    |  |  |

|                                                   |  |  |  |  |                                              |                                                                 |                                                                                                                         |                                                                                                                            |  |                                                                                |                                                         |                                                                                 |  |                             |  |
|---------------------------------------------------|--|--|--|--|----------------------------------------------|-----------------------------------------------------------------|-------------------------------------------------------------------------------------------------------------------------|----------------------------------------------------------------------------------------------------------------------------|--|--------------------------------------------------------------------------------|---------------------------------------------------------|---------------------------------------------------------------------------------|--|-----------------------------|--|
| Explained how to administer prescribed medication |  |  |  |  |                                              | All children: Explained how to administer prescribed medication |                                                                                                                         |                                                                                                                            |  |                                                                                |                                                         |                                                                                 |  |                             |  |
| Gave diagnosis                                    |  |  |  |  |                                              | Children 2-59mths: Gave diagnosis                               |                                                                                                                         |                                                                                                                            |  |                                                                                |                                                         |                                                                                 |  |                             |  |
| Plotted weight on chart                           |  |  |  |  |                                              | All children: plotted weight on chart                           |                                                                                                                         |                                                                                                                            |  |                                                                                |                                                         |                                                                                 |  |                             |  |
| Records                                           |  |  |  |  |                                              |                                                                 |                                                                                                                         |                                                                                                                            |  |                                                                                |                                                         | Observed or HCW reported keeping of individual patient records                  |  |                             |  |
| Scheduled/discussed return visit                  |  |  |  |  |                                              | All children: Scheduled/discussed return visit                  |                                                                                                                         |                                                                                                                            |  |                                                                                |                                                         |                                                                                 |  |                             |  |
| Take temperature                                  |  |  |  |  | Provider observed to ask child's temperature | All children: temperature                                       |                                                                                                                         |                                                                                                                            |  |                                                                                |                                                         | Observed or HCW reported routine temperature taking and recording               |  |                             |  |
| Timely treatment                                  |  |  |  |  |                                              |                                                                 |                                                                                                                         |                                                                                                                            |  | Mother reported prompt care-seeking within the first 24 hours of symptom onset |                                                         |                                                                                 |  | Sought care within 48 hours |  |
| Treated according to guidelines                   |  |  |  |  |                                              |                                                                 |                                                                                                                         |                                                                                                                            |  |                                                                                | Observed child correctly treated per provider diagnosis | HCW reported providers follow IMCI guidelines to assess and treat sick children |  |                             |  |
| Weighed                                           |  |  |  |  | Provider observed to check child's weight    | All children: weight                                            |                                                                                                                         |                                                                                                                            |  |                                                                                | Observed weighed and weight plotted on growth chart     | Observed or HCW reported child weight taken                                     |  |                             |  |
| <b>Quality: experience of care</b>                |  |  |  |  |                                              |                                                                 |                                                                                                                         |                                                                                                                            |  |                                                                                |                                                         |                                                                                 |  |                             |  |
| <b>User adherence</b>                             |  |  |  |  |                                              |                                                                 |                                                                                                                         |                                                                                                                            |  |                                                                                |                                                         |                                                                                 |  |                             |  |
| <b>Outcomes-adjusted coverage</b>                 |  |  |  |  |                                              |                                                                 |                                                                                                                         |                                                                                                                            |  |                                                                                |                                                         |                                                                                 |  |                             |  |
|                                                   |  |  |  |  |                                              |                                                                 | Visits to IMSS family medicine clinics that did not result in hospitalization due to diarrhoea for children under age 5 | Visits to IMSS family medicine clinics that did not result in hospitalization due to non-chronic respiratory condition for |  |                                                                                |                                                         |                                                                                 |  |                             |  |

|  |  |  |  |  |  |  |  |                         |  |  |  |  |  |  |
|--|--|--|--|--|--|--|--|-------------------------|--|--|--|--|--|--|
|  |  |  |  |  |  |  |  | children<br>under age 5 |  |  |  |  |  |  |
|--|--|--|--|--|--|--|--|-------------------------|--|--|--|--|--|--|

Table S9 Complementary feeding

| Study (data sources)                     | Aaron et al. 2016 (63) (HH)                                                                                                                              | Leyvraz et al. 2016a (61) (HH)                                                                                    | Leyvraz et al. 2016b (62) (HH)                                                                                    | Leyvraz et al. 2018 (60) (HH)                                                                                     | Nguyen et al. 2016 (57) (HH)                                                                                       |
|------------------------------------------|----------------------------------------------------------------------------------------------------------------------------------------------------------|-------------------------------------------------------------------------------------------------------------------|-------------------------------------------------------------------------------------------------------------------|-------------------------------------------------------------------------------------------------------------------|--------------------------------------------------------------------------------------------------------------------|
| Intervention                             | Complementary feeding supplement                                                                                                                         | Fortified Complementary Food                                                                                      | Fortified Complementary Food                                                                                      | Home fortification with micronutrient powders                                                                     | Fortification of complementary Foods with Micronutrient Powders                                                    |
| <b>Target population</b>                 |                                                                                                                                                          |                                                                                                                   |                                                                                                                   |                                                                                                                   |                                                                                                                    |
| Children                                 | Children aged 6-24 months<br>(1) all children<br>(2) children at-risk based on poverty, poor maternal dietary diversity and suboptimal feeding practices | Children aged 0-23 months<br>(1) all children<br>(2) children at-risk based on poverty and poor feeding practices | Children aged 0-35 months<br>(1) all children<br>(2) children at-risk based on poverty and poor feeding practices | Children aged 6-23 months<br>(1) all children<br>(2) children at-risk based on poverty and poor feeding practices | Children aged 6-59 mnths                                                                                           |
| <b>Service contact</b>                   |                                                                                                                                                          |                                                                                                                   |                                                                                                                   |                                                                                                                   |                                                                                                                    |
| Heard product                            | Caregiver ever heard of the product                                                                                                                      | Caregiver ever heard of Farinor or Nutribon                                                                       | Caregiver has ever heard of Bal Amrutham                                                                          | Caregiver has ever heard MNP                                                                                      | Caregiver has ever heard of or seen of the National Institute of Nutrition-specific micronutrient powder (Bibomix) |
| Received product                         |                                                                                                                                                          |                                                                                                                   | Caregiver ever received product                                                                                   |                                                                                                                   |                                                                                                                    |
| <b>Input-adjusted coverage</b>           |                                                                                                                                                          |                                                                                                                   |                                                                                                                   |                                                                                                                   |                                                                                                                    |
|                                          |                                                                                                                                                          |                                                                                                                   |                                                                                                                   |                                                                                                                   |                                                                                                                    |
| <b>Intervention coverage</b>             |                                                                                                                                                          |                                                                                                                   |                                                                                                                   |                                                                                                                   |                                                                                                                    |
| Consumed fortified food                  | Child ever been fed the product                                                                                                                          | Caregiver ever fed child fortified complementary food (Farinor or Nutribon)                                       | Caregiver ever fed child fortified complementary food                                                             | Child ever given micronutrient powder                                                                             | Child ever fed product                                                                                             |
| <b>Process quality-adjusted coverage</b> |                                                                                                                                                          |                                                                                                                   |                                                                                                                   |                                                                                                                   |                                                                                                                    |
|                                          |                                                                                                                                                          |                                                                                                                   |                                                                                                                   |                                                                                                                   |                                                                                                                    |
| <b>User-adherence adjusted coverage</b>  |                                                                                                                                                          |                                                                                                                   |                                                                                                                   |                                                                                                                   |                                                                                                                    |
| Partial                                  |                                                                                                                                                          | Child fed Farinor or Nutribon at least once in past mnth                                                          | Target child consumes Bal Amrutham sometimes or always                                                            | Child consumed at least 1 sachet of MNP in the past week                                                          | Consumed at least 1 sachet over the past week.                                                                     |
| Effective                                | Child fed product at least one in the previous seven days                                                                                                | Child fed Farinor or Nutribon at least once in past 7 days                                                        | Child always consumes Bal Amrutham                                                                                | Child consumed at least 3 sachets of MNP in past week                                                             | Consumed 3 or more sachets over the past week.                                                                     |
| <b>Outcome-adjusted coverage</b>         |                                                                                                                                                          |                                                                                                                   |                                                                                                                   |                                                                                                                   |                                                                                                                    |
|                                          |                                                                                                                                                          |                                                                                                                   |                                                                                                                   |                                                                                                                   |                                                                                                                    |

Table S10 Growth monitoring

| Study<br>(data sources)                            | Nguyen et al. 2021 (44)<br>(DHS, SPA)                                                           |
|----------------------------------------------------|-------------------------------------------------------------------------------------------------|
| Intervention                                       | Growth monitoring                                                                               |
| <b>Target population</b>                           |                                                                                                 |
| Children                                           | All children alive between 0-59 mnths                                                           |
| <b>Service contact</b>                             |                                                                                                 |
| Attend health service                              | All children who had diarrhoea or ARI symptoms for whom care was sought from a medical provider |
| <b>Input-adjusted coverage</b>                     |                                                                                                 |
| <b>Inputs: Staffing, training &amp; guidelines</b> |                                                                                                 |
| Guidelines                                         | Guidelines for growth monitoring (observed)                                                     |
| Training                                           | Staff with any training on growth monitoring                                                    |
| <b>Inputs: Supplies &amp; commodities</b>          |                                                                                                 |
| Growth chart                                       | Growth chart (observed)                                                                         |
| Length or height board                             | Length or height board (observed)                                                               |
| Scale                                              | Child scale (observed)                                                                          |
| Tape for measuring head                            | Tape for measuring head (observed)                                                              |
| <b>Intervention coverage</b>                       |                                                                                                 |
|                                                    |                                                                                                 |
| <b>Process quality-adjusted coverage</b>           |                                                                                                 |
|                                                    |                                                                                                 |
| <b>User-adherence adjusted coverage</b>            |                                                                                                 |
|                                                    |                                                                                                 |
| <b>Outcome-adjusted coverage</b>                   |                                                                                                 |
|                                                    |                                                                                                 |

Table S11 Insecticide treated bed net (ITN)

| Study<br>(data sources)                  | Nguhiu et al. 2017 (40)<br>(DHS)             |
|------------------------------------------|----------------------------------------------|
| Intervention                             | Malaria prevention                           |
| <b>Target population</b>                 |                                              |
|                                          | Children and pregnant women                  |
| <b>Service contact</b>                   |                                              |
|                                          | Live in household that own an ITN            |
| <b>Input-adjusted coverage</b>           |                                              |
|                                          |                                              |
| <b>Intervention coverage</b>             |                                              |
|                                          | Self-report slept under ITN the night before |
| <b>Process quality-adjusted coverage</b> |                                              |
|                                          |                                              |
| <b>User adherence-adjusted coverage</b>  |                                              |
|                                          |                                              |
| <b>Outcomes-adjusted coverage</b>        |                                              |
|                                          |                                              |

Table S12 Vaccination

| Study (data sources)                      | Mmanga et al. 2021 (59) (DHS)                              | Mokdad et al. 2015 (35) (HH survey)                                                      |                                                                                          |                                                                                          |                                                                                          | Nguhiu et al. 2017 (40) (DHS; SPA)                                                                                                                                                                                                                                                                                                                                     | Sheff et al. 2020 (48) (HH survey)                                                                                                                                                                                                  |
|-------------------------------------------|------------------------------------------------------------|------------------------------------------------------------------------------------------|------------------------------------------------------------------------------------------|------------------------------------------------------------------------------------------|------------------------------------------------------------------------------------------|------------------------------------------------------------------------------------------------------------------------------------------------------------------------------------------------------------------------------------------------------------------------------------------------------------------------------------------------------------------------|-------------------------------------------------------------------------------------------------------------------------------------------------------------------------------------------------------------------------------------|
| Intervention                              | Complete immunisation                                      | (1) Timely MMR vaccine                                                                   | (2) MMR vaccine: facility readiness (MMR in stock)                                       | (3) MMR vaccine: facility readiness (MMR stock-out in last 3 mnths)                      | (4) MMR vaccine: facility readiness (ORS in stock)                                       | Quality of primary care for children: complete set of basic vaccines                                                                                                                                                                                                                                                                                                   | Complete set of basic vaccines: quality coverage                                                                                                                                                                                    |
| <b>Target population</b>                  |                                                            |                                                                                          |                                                                                          |                                                                                          |                                                                                          |                                                                                                                                                                                                                                                                                                                                                                        |                                                                                                                                                                                                                                     |
|                                           | Children aged 12–23 months                                 | Children 13.5–59 months with a vaccination card                                          | Children 13.5–59 months with a vaccination card                                          | Children 13.5–59 months with a vaccination card                                          | Children 13.5–59 months with a vaccination card                                          | All children alive between 12-23 mnths                                                                                                                                                                                                                                                                                                                                 | Children aged 12-23 mnths                                                                                                                                                                                                           |
| <b>Service contact</b>                    |                                                            |                                                                                          |                                                                                          |                                                                                          |                                                                                          |                                                                                                                                                                                                                                                                                                                                                                        |                                                                                                                                                                                                                                     |
| Vaccination                               | Received either BCG or Penta1 vaccine during the past year | At least one caregiver-reported or card-documented MMR dose.                             | At least one caregiver-reported or card-documented MMR dose.                             | At least one caregiver-reported or card-documented MMR dose.                             | At least one caregiver-reported or card-documented MMR dose.                             | Received the complete set of vaccines as outlined in the Kenya Ministry of Health National Vaccination Schedule i.e. BCG, three doses of oral or intravenous Polio, three doses of Diphtheria, Pertussis, Tetanus, Hepatitis B and Haemophilus Influenza type B pentavalent vaccine, three doses of pneumococcal vaccine (from Jan 2011 onwards), and Measles vaccines | Received BCG vaccination                                                                                                                                                                                                            |
| <b>Inputs-adjusted coverage</b>           |                                                            |                                                                                          |                                                                                          |                                                                                          |                                                                                          |                                                                                                                                                                                                                                                                                                                                                                        |                                                                                                                                                                                                                                     |
| <b>Inputs: Supplies &amp; commodities</b> |                                                            |                                                                                          |                                                                                          |                                                                                          |                                                                                          |                                                                                                                                                                                                                                                                                                                                                                        |                                                                                                                                                                                                                                     |
| MMR                                       |                                                            |                                                                                          | MMR in stock on day of survey                                                            | MMR in stock on day of survey & stock out in three months prior to survey                |                                                                                          |                                                                                                                                                                                                                                                                                                                                                                        |                                                                                                                                                                                                                                     |
| ORS                                       |                                                            |                                                                                          |                                                                                          |                                                                                          | ORS in stock on day of health facility survey                                            |                                                                                                                                                                                                                                                                                                                                                                        |                                                                                                                                                                                                                                     |
| Scale                                     |                                                            |                                                                                          |                                                                                          |                                                                                          |                                                                                          | Observed at least one working infant weighing scale or child scale present                                                                                                                                                                                                                                                                                             |                                                                                                                                                                                                                                     |
| Thermometer                               |                                                            |                                                                                          |                                                                                          |                                                                                          |                                                                                          | Observed at least one thermometer                                                                                                                                                                                                                                                                                                                                      |                                                                                                                                                                                                                                     |
| <b>Intervention coverage</b>              |                                                            |                                                                                          |                                                                                          |                                                                                          |                                                                                          |                                                                                                                                                                                                                                                                                                                                                                        |                                                                                                                                                                                                                                     |
| Additional vaccines                       | Received Penta 3 vaccine during past year                  |                                                                                          |                                                                                          |                                                                                          |                                                                                          |                                                                                                                                                                                                                                                                                                                                                                        | Received all three doses of the DPT vaccine                                                                                                                                                                                         |
|                                           | Received with MR1 during the past year                     |                                                                                          |                                                                                          |                                                                                          |                                                                                          |                                                                                                                                                                                                                                                                                                                                                                        |                                                                                                                                                                                                                                     |
| <b>Process quality-adjusted coverage</b>  |                                                            |                                                                                          |                                                                                          |                                                                                          |                                                                                          |                                                                                                                                                                                                                                                                                                                                                                        |                                                                                                                                                                                                                                     |
| <b>Quality: process of care</b>           |                                                            |                                                                                          |                                                                                          |                                                                                          |                                                                                          |                                                                                                                                                                                                                                                                                                                                                                        |                                                                                                                                                                                                                                     |
| Check immunisations                       |                                                            |                                                                                          |                                                                                          |                                                                                          |                                                                                          | Observed or HCW reported routine assessment of immunisation status                                                                                                                                                                                                                                                                                                     |                                                                                                                                                                                                                                     |
| Records                                   |                                                            |                                                                                          |                                                                                          |                                                                                          |                                                                                          | Observed or HCW reported keeping of individual patient records                                                                                                                                                                                                                                                                                                         |                                                                                                                                                                                                                                     |
| Temperature                               |                                                            |                                                                                          |                                                                                          |                                                                                          |                                                                                          | Observed or HCW reported child's temperature taken                                                                                                                                                                                                                                                                                                                     |                                                                                                                                                                                                                                     |
| Weighed                                   |                                                            |                                                                                          |                                                                                          |                                                                                          |                                                                                          | Observed or HCW reported child weight taken                                                                                                                                                                                                                                                                                                                            |                                                                                                                                                                                                                                     |
| Guidelines                                |                                                            |                                                                                          |                                                                                          |                                                                                          |                                                                                          | HCW reported providers follow IMCI guidelines to assess and treat sick children                                                                                                                                                                                                                                                                                        |                                                                                                                                                                                                                                     |
| Recommended according to schedule         | Received BCG, OPV3, Penta3, PCV3, Rota2 and MCV1 vaccines  | MMR vaccine given within recommended interval: administered between 11.5 and 13.5 months | MMR vaccine given within recommended interval: administered between 11.5 and 13.5 months | MMR vaccine given within recommended interval: administered between 11.5 and 13.5 months | MMR vaccine given within recommended interval: administered between 11.5 and 13.5 months |                                                                                                                                                                                                                                                                                                                                                                        | Received all of the basic vaccinations by 24 months: one dose of BCG at birth, three doses of the oral polio vaccine (excluding the dose given at birth), three doses of a DPT containing vaccine and hepatitis B vaccine at 6, 10, |



|                                         |  |  |  |  |  |  |                                                    |
|-----------------------------------------|--|--|--|--|--|--|----------------------------------------------------|
|                                         |  |  |  |  |  |  | and 14 weeks, and one dose of the measles vaccine. |
| <b>User-adherence adjusted coverage</b> |  |  |  |  |  |  |                                                    |
|                                         |  |  |  |  |  |  |                                                    |
| <b>Outcomes-adjusted coverage</b>       |  |  |  |  |  |  |                                                    |
|                                         |  |  |  |  |  |  |                                                    |
